# Supplementary material
Source: PubMed Central journal article supplement (PMC7796985)
Supplement: NIHMS1654501-supplement-table_3.pdf [file NIHMS1654501-supplement-table_3.pdf]

| Bacteria Name                                    | Protein ID | Gene Product  | Function                 | 4 dpi SAC | 10 dpi SAC | 4 dpi Interface | 10 dpi Interface |
|--------------------------------------------------|------------|---------------|--------------------------|-----------|------------|-----------------|------------------|
| 30S ribosomal protein S10                        | Q2FEN8     | RpsJ          | Ribosome                 | NO        | YES        | NO              | YES              |
| 50S ribosomal protein L2                         | Q2FEP2     | RplB          | Ribosome                 | YES       | YES        | NO              | YES              |
| 30S ribosomal protein S8                         | Q2FEQ3     | RpsH          | Ribosome                 | NO        | YES        | NO              | YES              |
| 50S ribosomal protein L6                         | Q2FEQ4     | RplF          | Ribosome                 | NO        | NO         | NO              | YES              |
| 50S ribosomal protein L18                        | Q2FEQ5     | RplR          | Ribosome                 | NO        | NO         | NO              | YES              |
| 30S ribosomal protein S5                         | Q2FEQ6     | RpsE          | Ribosome                 | NO        | NO         | NO              | YES              |
| 50S ribosomal protein L15                        | Q2FEQ8     | RplO          | Ribosome                 | NO        | YES        | NO              | YES              |
| 50S ribosomal protein L21                        | Q2FG80     | RplU          | Ribosome                 | NO        | YES        | NO              | YES              |
| 30S ribosomal protein S20                        | Q2FGD8     | RpsT          | Ribosome                 | NO        | YES        | NO              | YES              |
| Ribosome-recycling factor                        | Q2FHH9     | Frr           | Ribosome                 | NO        | YES        | NO              | YES              |
| 50S ribosomal protein L25                        | Q2FJE0     | RplY          | Ribosome                 | NO        | YES        | NO              | YES              |
| Uncharacterized leukocidin-like protein 1        | Q2FFA3     | LukB          | Virulence                | NO        | YES        | NO              | YES              |
| Chemotaxis inhibitory protein                    | Q2FFF7     | Chp           | Virulence/Immune Evasion | NO        | YES        | NO              | YES              |
| Serine-aspartate repeat-containing protein E     | Q2FJ77     | SdrE          | Virulence/Immune Evasion | NO        | YES        | NO              | YES              |
| Putative heme-dependent peroxidase SAUSA300_0569 | Q2FJ56     | ChdC          | Metal homeostasis        | NO        | YES        | NO              | YES              |
| Sulfur carrier protein FdhD                      | Q2FEL2     | FdhD          | Sulfur Carrier Protein   | NO        | NO         | NO              | YES              |
| Acetate kinase                                   | Q2FG27     | AckA          | Anaerobic metabolism     | NO        | YES        | NO              | NO               |
| L-lactate dehydrogenase 1                        | Q2FK29     | Ldh1          | Anaerobic metabolism     | YES       | YES        | NO              | YES              |
| UPF0342 protein SAUSA300_1795                    | Q2FFQ0     | SAUSA300_1795 | Unknown function         | NO        | YES        | NO              | YES              |
| 60 kDa chaperonin                                | Q2FF95     | GroL          | Protein folding          | NO        | YES        | NO              | YES              |
| Thioredoxin                                      | Q2FHT6     | TrxA          | Redox reactions          | NO        | YES        | NO              | YES              |

|                                                        |        |       |                                                |     |     |     |     |
|--------------------------------------------------------|--------|-------|------------------------------------------------|-----|-----|-----|-----|
| HTH-type transcriptional regulator ArcR                | Q2FDM8 | ArcR  | Regulation/Anaerobic Conditions                | NO  | NO  | YES | NO  |
| Transcription elongation factor GreA                   | Q2FGB6 | GreA  | Transcription Elongation Factor                | NO  | YES | NO  | YES |
| Nuclease SbcCD subunit C                               | Q2FH88 | SbcC  | DNA Replication                                | YES | NO  | YES | NO  |
| Pyrimidine-nucleoside phosphorylase                    | Q2FEZ3 | Pdp   | Phosphorolysis of the pyrimidine nucleosides   | YES | YES | NO  | YES |
| ATP synthase subunit b                                 | Q2FF20 | AtpF  | Energy                                         | NO  | YES | NO  | YES |
| Probable manganese-dependent inorganic pyrophosphatase | Q2FFH6 | PpaC  | Unknown function                               | YES | NO  | YES | NO  |
| Phosphoenolpyruvate carboxykinase (ATP)                | Q2FFV5 | PckA  | Gluconeogenesis                                | NO  | YES | NO  | YES |
| L-threonine dehydratase catabolic TdcB                 | Q2FH01 | TdcB  | L-threonine degradation via propanoate pathway | NO  | YES | NO  | YES |
| Bifunctional protein FOLD                              | Q2FI15 | FoldD | Folate biosynthesis                            | NO  | YES | NO  | YES |

Table S3: List of bacterial proteins detected and their localizations with lower identification confidence
