# Supplementary material
Source: PubMed Central journal article supplement (PMC7796985)
Supplement: NIHMS1654501-supplement-Table_S1.pdf [file NIHMS1654501-supplement-Table_S1.pdf]

|                                                                       |        |     |     |     |     |     |     |      |
|-----------------------------------------------------------------------|--------|-----|-----|-----|-----|-----|-----|------|
| GPX3 Glutathione peroxidase 3                                         | P46412 | YES | YES | NO  | YES | YES | NO  | P/MQ |
| GSHR Glutathione reductase, mitochondrial                             | P47791 | YES | YES | YES | YES | YES | YES | P/MQ |
| ACADVL Very long-chain specific acyl-CoA dehydrogenase, mitochondrial | P50544 | YES | YES | YES | YES | NO  | YES | P/MQ |
| ACADL Long-chain specific acyl-CoA dehydrogenase, mitochondrial       | P51174 | YES | YES | YES | YES | YES | YES | P/MQ |
| GSHB Glutathione synthetase                                           | P51855 | YES | YES | NO  | NO  | NO  | NO  | P    |
| KPYM Pyruvate kinase PKM                                              | P52480 | YES | YES | YES | YES | YES | YES | P/MQ |
| IDH2 Isocitrate dehydrogenase [NADP], mitochondrial                   | P54071 | YES | YES | YES | YES | YES | YES | P/MQ |
| FH Fumarate hydratase, mitochondrial                                  | P97807 | YES | NO  | YES | YES | YES | YES | P/MQ |
| G6PDX Glucose-6-phosphate 1-dehydrogenase X                           | Q00612 | NO  | NO  | YES | YES | YES | YES | P/MQ |
| ACADS Short-chain specific acyl-CoA dehydrogenase, mitochondrial      | Q07417 | YES | YES | NO  | NO  | NO  | NO  | P    |
| HK3 Hexokinase-3                                                      | Q3TRM8 | NO  | NO  | YES | YES | YES | YES | P/MQ |
| GSTT2 Glutathione S-transferase theta-2                               | Q61133 | NO  | YES | NO  | NO  | NO  | NO  | P    |
| HADH Hydroxyacyl-coenzyme A dehydrogenase, mitochondrial              | Q61425 | YES | NO  | YES | NO  | YES | NO  | P    |
| ECI3 Enoyl-CoA delta isomerase 3, peroxisomal                         | Q78JN3 | NO  | YES | NO  | NO  | NO  | NO  | P    |
| ECHM Enoyl-CoA hydratase, mitochondrial                               | Q8BH95 | YES | NO  | YES | YES | YES | YES | P/MQ |
| ACAA2 3-ketoacyl-CoA thiolase, mitochondrial                          | Q8BWT1 | YES | NO  | YES | YES | YES | YES | P/MQ |
| ACAD9 Acyl-CoA dehydrogenase family member 9, mitochondrial           | Q8JZN5 | NO  | YES | NO  | NO  | NO  | NO  | P    |
| ACAD10 Acyl-CoA dehydrogenase family member 10                        | Q8K370 | NO  | YES | NO  | NO  | NO  | NO  | P    |
| ACAA1B 3-ketoacyl-CoA thiolase B, peroxisomal                         | Q8VCH0 | NO  | YES | NO  | NO  | NO  | NO  | P/MQ |
| ALDOB Fructose-bisphosphate aldolase B                                | Q91Y97 | YES | NO  | YES | YES | YES | YES | P/MQ |
| ACO2 Aconitate hydratase, mitochondrial                               | Q99KI0 | YES | NO  | YES | YES | YES | YES | P/MQ |
| GSTT3 Glutathione S-transferase theta-3                               | Q99L20 | NO  | YES | NO  | NO  | NO  | NO  | P    |
| PECR Peroxisomal trans-2-enoyl-CoA reductase                          | Q99MZ7 | YES | NO  | YES | NO  | YES | NO  | P/MQ |
| PGLS 6-phosphogluconolactonase                                        | Q9CQ60 | YES | NO  | YES | YES | YES | YES | P/MQ |
| DECR1 2,4-dienoyl-CoA reductase, mitochondrial                        | Q9CQ62 | YES | NO  | YES | NO  | YES | NO  | P/MQ |



|                                                                                  |            |     |     |     |     |     |     |     |      |
|----------------------------------------------------------------------------------|------------|-----|-----|-----|-----|-----|-----|-----|------|
| Kininogen 2                                                                      | A0A338P699 | YES | MQ   |
| High mobility group protein HMG-I/HMG-Y                                          | A0A338P6G6 | YES | MQ   |
| Myosin-11                                                                        | A0A338P6K2 | YES | MQ   |
| Receptor expression-enhancing protein 5                                          | A0A494BBE3 | YES | MQ   |
| K1522 Uncharacterized protein KIAA1522                                           | A2A7S8     | NO  | YES | NO  | NO  | NO  | NO  | NO  | P    |
| SPD2B SH3 and PX domain-containing protein 2B                                    | A2AAY5     | NO  | NO  | NO  | YES | NO  | NO  | NO  | P    |
| DDI2 Protein DDI1 homolog 2                                                      | A2ADY9     | YES | P/MQ |
| CKAP5 Cytoskeleton-associated protein 5                                          | A2AGT5     | NO  | NO  | NO  | YES | YES | YES | YES | P    |
| MA7D1 MAP7 domain-containing protein 1                                           | A2AJI0     | NO  | YES | NO  | YES | NO  | NO  | NO  | P    |
| QCR2 Cytochrome b-c1 complex subunit 2, mitochondrial                            | A2AKK5     | YES | YES | NO  | NO  | NO  | NO  | NO  | P    |
| UBR4 E3 ubiquitin-protein ligase UBR4                                            | A2AN08     | NO  | NO  | NO  | NO  | YES | NO  | NO  | P    |
| LRP2 Low-density lipoprotein receptor-related protein 2                          | A2ARV4     | YES | YES | YES | NO  | YES | NO  | NO  | P/MQ |
| AGRIN Agrin                                                                      | A2ASQ1     | NO  | YES | YES | YES | YES | NO  | NO  | P    |
| ARI1A AT-rich interactive domain-containing protein 1A                           | A2BH40     | NO  | NO  | NO  | YES | YES | NO  | NO  | P    |
| RPN2 Dolichyl-diphosphooligosaccharide--protein glycosyltransferase subunit 2    | A3KMP2     | YES | YES | NO  | NO  | NO  | NO  | NO  | P    |
| MMRN2 Multimerin-2                                                               | A6H6E2     | NO  | YES | NO  | NO  | NO  | NO  | NO  | P    |
| ITIH4 Inter alpha-trypsin inhibitor, heavy chain 4                               | A6X935     | YES | P/MQ |
| THOC2 THO complex subunit 2                                                      | B1AZI6     | NO  | NO  | NO  | YES | NO  | NO  | NO  | P    |
| ANR44 Serine/threonine-protein phosphatase 6 regulatory ankyrin repeat subunit B | B2RXR6     | NO  | NO  | NO  | YES | NO  | NO  | NO  | P    |
| PLXB2 Plexin-B2                                                                  | B2RXS4     | NO  | YES | NO  | NO  | NO  | NO  | NO  | P    |
| RBM25 RNA-binding protein 25                                                     | B2RY56     | NO  | NO  | YES | YES | NO  | NO  | NO  | P    |
| OSBL8 Oxysterol-binding protein-related protein 8                                | B9EJ86     | NO  | YES | NO  | YES | NO  | NO  | NO  | P    |
| H2A1D Histone H2A type 1-D                                                       | COHKE3     | NO  | NO  | NO  | YES | NO  | NO  | NO  | P/MQ |
| RNT2A Ribonuclease T2-A                                                          | COHKG5     | NO  | YES | NO  | NO  | NO  | NO  | NO  | P    |
| SAFB1 Scaffold attachment factor B1                                              | D3YXK2     | NO  | NO  | NO  | YES | YES | NO  | NO  | P    |





|                                                                                   |        |     |     |     |     |     |     |      |
|-----------------------------------------------------------------------------------|--------|-----|-----|-----|-----|-----|-----|------|
| NAPSA Napsin-A                                                                    | O09043 | NO  | YES | NO  | NO  | NO  | NO  | P    |
| SNP23 Synaptosomal-associated protein 23                                          | O09044 | YES | YES | NO  | YES | NO  | YES | P/MQ |
| PSB1 Proteasome subunit beta type-1                                               | O09061 | NO  | NO  | YES | YES | YES | YES | P    |
| NDUBB NADH dehydrogenase [ubiquinone] 1 beta subcomplex subunit 11, mitochondrial | O09111 | NO  | YES | NO  | NO  | NO  | NO  | P    |
| MA2B1 Lysosomal alpha-mannosidase                                                 | O09159 | NO  | YES | NO  | YES | NO  | YES | P/MQ |
| SODE Extracellular superoxide dismutase [Cu-Zn]                                   | O09164 | NO  | YES | NO  | YES | YES | NO  | P    |
| RL21 60S ribosomal protein L21                                                    | O09167 | YES | YES | YES | YES | YES | YES | P/MQ |
| GSH0 Glutamate--cysteine ligase regulatory subunit                                | O09172 | NO  | NO  | NO  | YES | YES | NO  | P    |
| HGD Homogentisate 1,2-dioxygenase                                                 | O09173 | NO  | YES | NO  | NO  | NO  | NO  | P    |
| AMACR Alpha-methylacyl-CoA racemase                                               | O09174 | YES | YES | NO  | NO  | NO  | NO  | P    |
| PHB2 Prohibitin-2                                                                 | O35129 | YES | YES | YES | YES | YES | YES | P/MQ |
| ATIF1 ATPase inhibitor, mitochondrial                                             | O35143 | YES | YES | YES | YES | YES | YES | P    |
| COFA1 Collagen alpha-1(XV) chain                                                  | O35206 | NO  | YES | NO  | YES | NO  | NO  | P    |
| DOPD D-dopachrome decarboxylase                                                   | O35215 | YES | YES | YES | NO  | YES | NO  | P/MQ |
| PSMD4 26S proteasome non-ATPase regulatory subunit 4                              | O35226 | NO  | YES | YES | YES | NO  | NO  | P    |
| DHX15 Pre-mRNA-splicing factor ATP-dependent RNA helicase DHX15                   | O35286 | YES | YES | YES | YES | YES | YES | P/MQ |
| PURB Transcriptional activator protein Pur-beta                                   | O35295 | YES | YES | NO  | YES | YES | YES | P/MQ |
| SRSF5 Serine/arginine-rich splicing factor 5                                      | O35326 | NO  | YES | NO  | NO  | NO  | NO  | P    |
| CAN1 Calpain-1 catalytic subunit                                                  | O35350 | NO  | YES | YES | YES | YES | YES | P/MQ |
| AN32A Acidic leucine-rich nuclear phosphoprotein 32 family member A               | O35381 | YES | YES | YES | YES | YES | YES | P/MQ |
| EXOC4 Exocyst complex component 4                                                 | O35382 | NO  | YES | NO  | YES | NO  | NO  | P/MQ |
| FOLH1 Glutamate carboxypeptidase 2                                                | O35409 | NO  | YES | NO  | NO  | NO  | NO  | P    |
| ECH1 Delta(3,5)-Delta(2,4)-dienoyl-CoA isomerase, mitochondrial                   | O35459 | YES | YES | NO  | NO  | YES | NO  | P/MQ |
| FKBP8 Peptidyl-prolyl cis-trans isomerase FKBP8                                   | O35465 | NO  | YES | NO  | NO  | NO  | NO  | P    |
| S27A2 Very long-chain acyl-CoA synthetase                                         | O35488 | YES | YES | NO  | NO  | YES | NO  | P    |

|                                                                                     |        |     |     |     |     |     |     |      |
|-------------------------------------------------------------------------------------|--------|-----|-----|-----|-----|-----|-----|------|
| PSDE 26S proteasome non-ATPase regulatory subunit 14                                | O35593 | NO  | YES | NO  | YES | YES | NO  | P/MQ |
| FYB1 FYN-binding protein 1                                                          | O35601 | NO  | NO  | NO  | YES | NO  | YES | P/MQ |
| SCAM3 Secretory carrier-associated membrane protein 3                               | O35609 | NO  | YES | NO  | YES | YES | NO  | P    |
| ANXA3 Annexin A3                                                                    | O35639 | YES | YES | YES | YES | YES | YES | P/MQ |
| AP1B1 AP-1 complex subunit beta-1                                                   | O35643 | NO  | YES | NO  | YES | NO  | NO  | P    |
| NEUR1 Sialidase-1                                                                   | O35657 | NO  | YES | NO  | NO  | NO  | NO  | P    |
| C1QBP Complement component 1 Q subcomponent-binding protein, mitochondrial          | O35658 | NO  | NO  | NO  | NO  | YES | NO  | P/MQ |
| NUDC Nuclear migration protein nudC                                                 | O35685 | YES | YES | YES | YES | YES | YES | P/MQ |
| PININ Pinin                                                                         | O35691 | NO  | YES | NO  | NO  | NO  | NO  | P    |
| SPTC1 Serine palmitoyltransferase 1                                                 | O35704 | NO  | YES | NO  | NO  | NO  | NO  | P    |
| HNRH1 Heterogeneous nuclear ribonucleoprotein H                                     | O35737 | NO  | NO  | YES | YES | YES | YES | P/MQ |
| CHIL3 Chitinase-like protein 3                                                      | O35744 | YES | YES | YES | YES | YES | YES | P/MQ |
| API5 Apoptosis inhibitor 5                                                          | O35841 | NO  | YES | NO  | YES | YES | YES | P    |
| BCAT2 Branched-chain-amino-acid aminotransferase, mitochondrial                     | O35855 | NO  | YES | NO  | NO  | NO  | NO  | P    |
| TIM44 Mitochondrial import inner membrane translocase subunit TIM44                 | O35857 | NO  | YES | NO  | YES | YES | NO  | P    |
| CALU Calumenin                                                                      | O35887 | YES | YES | YES | YES | YES | YES | P    |
| SP100 Nuclear autoantigen Sp-100                                                    | O35892 | NO  | YES | NO  | YES | NO  | NO  | P/MQ |
| PSB10 Proteasome subunit beta type-10                                               | O35955 | NO  | YES | YES | YES | NO  | YES | P/MQ |
| RM23 39S ribosomal protein L23, mitochondrial                                       | O35972 | NO  | YES | NO  | NO  | NO  | NO  | P    |
| SDC4 Syndecan-4                                                                     | O35988 | YES | YES | NO  | NO  | NO  | NO  | P/MQ |
| CAVN1 Caveolae-associated protein 1                                                 | O54724 | YES | YES | YES | YES | NO  | NO  | P/MQ |
| OST48 Dolichyl-diphosphooligosaccharide--protein glycosyltransferase 48 kDa subunit | O54734 | YES | YES | YES | YES | YES | YES | P    |
| AP3D1 AP-3 complex subunit delta-1                                                  | O54774 | NO  | NO  | NO  | YES | NO  | YES | P    |
| IL16 Pro-interleukin-16                                                             | O54824 | NO  | NO  | NO  | YES | YES | YES | P    |



|                                                             |        |     |     |     |     |     |     |      |
|-------------------------------------------------------------|--------|-----|-----|-----|-----|-----|-----|------|
| HMGB3 High mobility group protein B3                        | O54879 | NO  | YES | NO  | YES | YES | YES | P    |
| REPS1 RalBP1-associated Eps domain-containing protein 1     | O54916 | NO  | YES | NO  | NO  | NO  | NO  | P    |
| AKAP2 A-kinase anchor protein 2                             | O54931 | YES | YES | YES | YES | YES | YES | P    |
| MTG16 Protein CBFA2T3                                       | O54972 | NO  | NO  | NO  | YES | NO  | NO  | P    |
| ASNA ATPase Asna1                                           | O54984 | NO  | NO  | NO  | YES | NO  | NO  | P    |
| SLK STE20-like serine/threonine-protein kinase              | O54988 | YES | YES | YES | YES | YES | YES | P/MQ |
| PROM1 Prominin-1                                            | O54990 | NO  | YES | NO  | NO  | NO  | NO  | P    |
| TPPC3 Trafficking protein particle complex subunit 3        | O55013 | NO  | YES | NO  | NO  | NO  | NO  | P    |
| PGRC1 Membrane-associated progesterone receptor component 1 | O55022 | YES | YES | NO  | YES | NO  | NO  | P    |
| IMPA1 Inositol monophosphatase 1                            | O55023 | YES | YES | YES | YES | YES | YES | P    |
| COPB2 Coatomer subunit beta'                                | O55029 | YES | YES | YES | YES | YES | YES | P    |
| SYUA Alpha-synuclein                                        | O55042 | YES | YES | NO  | NO  | YES | NO  | P    |
| STK10 Serine/threonine-protein kinase 10                    | O55098 | NO  | NO  | YES | YES | YES | YES | P/MQ |
| STRN Striatin                                               | O55106 | NO  | YES | NO  | YES | YES | YES | P    |
| O55125                                                      | O55125 | YES | NO  | NO  | NO  | NO  | NO  | P    |
| SEPT7 Septin-7                                              | O55131 | YES | YES | YES | YES | YES | YES | P/MQ |
| IF6 Eukaryotic translation initiation factor 6              | O55135 | NO  | YES | YES | YES | YES | NO  | P/MQ |
| RL35A 60S ribosomal protein L35a                            | O55142 | YES | YES | NO  | NO  | YES | YES | P    |
| AT2A2 Sarcoplasmic/endoplasmic reticulum calcium ATPase 2   | O55143 | YES | YES | YES | YES | YES | YES | P/MQ |
| SPT5H Transcription elongation factor SPT5                  | O55201 | NO  | NO  | NO  | YES | NO  | NO  | P    |
| ILK Integrin-linked protein kinase                          | O55222 | NO  | NO  | YES | YES | YES | YES | P    |
| PSB5 Proteasome subunit beta type-5                         | O55234 | NO  | YES | NO  | NO  | NO  | NO  | P    |
| DHX9 ATP-dependent RNA helicase A                           | O70133 | NO  | YES | YES | YES | YES | YES | P/MQ |
| MMP8 Neutrophil collagenase                                 | O70138 | NO  | NO  | NO  | YES | NO  | YES | P    |
| NCF2 Neutrophil cytosol factor 2                            | O70145 | NO  | NO  | YES | YES | YES | YES | P/MQ |
| AIF1 Allograft inflammatory factor 1                        | O70200 | NO  | NO  | NO  | YES | NO  | NO  | P    |

|                                                                      |        |     |     |     |     |     |     |      |
|----------------------------------------------------------------------|--------|-----|-----|-----|-----|-----|-----|------|
| EF1B Elongation factor 1-beta                                        | O70251 | YES | YES | NO  | YES | YES | YES | P/MQ |
| NMT1 Glycylpeptide N-tetradecanoyltransferase 1                      | O70310 | NO  | NO  | NO  | YES | YES | YES | P    |
| E41L2 Band 4.1-like protein 2                                        | O70318 | YES | YES | YES | YES | YES | YES | P/MQ |
| RNH1 Ribonuclease H1                                                 | O70338 | NO  | YES | NO  | NO  | NO  | NO  | P    |
| PDL1 PDZ and LIM domain protein 1                                    | O70400 | NO  | YES | NO  | NO  | YES | NO  | P    |
| VAMP8 Vesicle-associated membrane protein 8                          | O70404 | NO  | YES | YES | YES | YES | YES | P/MQ |
| FHL2 Four and a half LIM domains protein 2                           | O70433 | NO  | YES | NO  | NO  | NO  | NO  | P    |
| PSA3 Proteasome subunit alpha type-3                                 | O70435 | NO  | YES | YES | YES | YES | YES | P/MQ |
| STX7 Syntaxin-7                                                      | O70439 | YES | YES | YES | YES | YES | YES | P/MQ |
| 1433S 14-3-3 protein sigma                                           | O70456 | NO  | NO  | NO  | NO  | YES | NO  | P    |
| UGDH UDP-glucose 6-dehydrogenase                                     | O70475 | YES | YES | NO  | YES | YES | YES | P/MQ |
| SNX3 Sorting nexin-3                                                 | O70492 | YES | YES | YES | YES | YES | YES | P/MQ |
| SRPK1 SRSF protein kinase 1                                          | O70551 | NO  | YES | NO  | NO  | NO  | NO  | P    |
| PIGR Polymeric immunoglobulin receptor                               | O70570 | NO  | NO  | NO  | NO  | YES | NO  | P    |
| NSMA Sphingomyelin phosphodiesterase 2                               | O70572 | NO  | YES | NO  | NO  | NO  | NO  | P    |
| S22A2 Solute carrier family 22 member 2                              | O70577 | YES | YES | NO  | NO  | NO  | NO  | P    |
| CSKP Peripheral plasma membrane protein CASK                         | O70589 | NO  | YES | NO  | NO  | NO  | NO  | P    |
| PFD2 Prefoldin subunit 2                                             | O70591 | NO  | YES | NO  | YES | NO  | YES | P/MQ |
| CFDP1 Craniofacial development protein 1                             | O88271 | NO  | NO  | NO  | YES | YES | YES | P    |
| ZN326 DBIRD complex subunit ZNF326                                   | O88291 | NO  | YES | NO  | NO  | NO  | NO  | P    |
| SORL1 Sortilin-related receptor                                      | O88307 | NO  | YES | NO  | NO  | NO  | NO  | P    |
| NID2 Nidogen-2                                                       | O88322 | YES | YES | NO  | YES | YES | YES | P/MQ |
| CAD16 Cadherin-16                                                    | O88338 | YES | YES | YES | NO  | YES | YES | P/MQ |
| WDR1 WD repeat-containing protein 1                                  | O88342 | YES | YES | YES | YES | YES | YES | P/MQ |
| S4A4 Electrogenic sodium bicarbonate cotransporter 1                 | O88343 | YES | YES | NO  | NO  | NO  | NO  | P/MQ |
| VTI1B Vesicle transport through interaction with t-SNAREs homolog 1B | O88384 | NO  | NO  | NO  | YES | YES | YES | P/MQ |



|                                                              |        |     |     |     |     |     |     |      |
|--------------------------------------------------------------|--------|-----|-----|-----|-----|-----|-----|------|
| CO4B Complement C4-B                                         | P01029 | YES | YES | NO  | NO  | YES | YES | P    |
| IGJ Immunoglobulin J chain                                   | P01592 | YES | YES | NO  | NO  | YES | NO  | P    |
| KV2A7 Ig kappa chain V-II region 26-10                       | P01631 | NO  | YES | NO  | NO  | NO  | NO  | P    |
| KV5A3 Ig kappa chain V-V region K2 (Fragment)                | P01635 | NO  | YES | NO  | NO  | NO  | NO  | P    |
| KV5A9 Ig kappa chain V-V region L7 (Fragment)                | P01642 | NO  | YES | NO  | NO  | NO  | NO  | P    |
| KV5AA Ig kappa chain V-V region MOPC 173                     | P01643 | NO  | YES | NO  | NO  | NO  | NO  | P    |
| KV3A1 Ig kappa chain V-III region PC 2880/PC 1229            | P01654 | NO  | YES | NO  | NO  | NO  | NO  | P    |
| KV3AI Ig kappa chain V-III region PC 6684                    | P01670 | NO  | NO  | NO  | YES | NO  | NO  | P    |
| LV1A Ig lambda-1 chain V region                              | P01723 | NO  | YES | NO  | NO  | NO  | NO  | P    |
| HVM28 Ig heavy chain V-III region U61                        | P01797 | NO  | YES | NO  | YES | NO  | NO  | P    |
| IGKC Immunoglobulin kappa constant                           | P01837 | YES | YES | NO  | YES | YES | YES | P    |
| GCAB Ig gamma-2A chain C region secreted form                | P01864 | NO  | YES | NO  | YES | NO  | NO  | P    |
| IGG2B Ig gamma-2B chain C region                             | P01867 | NO  | YES | NO  | NO  | NO  | NO  | P    |
| IGHM Immunoglobulin heavy constant mu                        | P01872 | YES | YES | YES | YES | YES | YES | P/MQ |
| B2MG Beta-2-microglobulin                                    | P01887 | NO  | YES | NO  | NO  | NO  | YES | P    |
| HA11 H-2 class I histocompatibility antigen, D-B alpha chain | P01899 | NO  | NO  | YES | YES | YES | YES | P    |
| HA12 H-2 class I histocompatibility antigen, D-D alpha chain | P01900 | NO  | YES | NO  | NO  | NO  | NO  | P    |
| HA1B H-2 class I histocompatibility antigen, K-B alpha chain | P01901 | NO  | YES | YES | YES | YES | NO  | P    |
| HB2D H-2 class II histocompatibility antigen, A-D beta chain | P01921 | NO  | YES | NO  | NO  | NO  | NO  | P    |
| HBA Hemoglobin subunit alpha                                 | P01942 | YES | YES | YES | YES | YES | YES | P/MQ |
| HBB-b1 Hemoglobin subunit beta-1                             | P02088 | YES | YES | YES | YES | YES | YES | P/MQ |
| HBB-b2 Hemoglobin subunit beta-2                             | P02089 | NO  | YES | NO  | NO  | NO  | NO  | P/MQ |
| LAMC1 Laminin subunit gamma-1                                | P02468 | YES | YES | NO  | YES | YES | YES | P/MQ |
| LAMB1 Laminin subunit beta-1                                 | P02469 | NO  | YES | NO  | NO  | NO  | NO  | P    |
| ADA Adenosine deaminase                                      | P03958 | NO  | NO  | NO  | YES | NO  | NO  | P    |





|                                                                  |        |     |     |     |     |     |     |      |
|------------------------------------------------------------------|--------|-----|-----|-----|-----|-----|-----|------|
| Annexin A1                                                       | P10107 | YES | YES | YES | YES | YES | YES | MQ   |
| EF1A1 Elongation factor 1-alpha 1                                | P10126 | YES | YES | YES | YES | YES | YES | P/MQ |
| CO4B Complement C4-B                                             | P1029  | NO  | NO  | YES | NO  | NO  | NO  | P    |
| NID1 Nidogen-1                                                   | P10493 | YES | YES | YES | YES | YES | YES | P/MQ |
| HEM2 Delta-aminolevulinic acid dehydratase                       | P10518 | NO  | YES | NO  | NO  | YES | NO  | P    |
| TAU Microtubule-associated protein tau                           | P10637 | YES | YES | NO  | NO  | YES | NO  | P/MQ |
| THIO Thioredoxin                                                 | P10639 | YES | YES | YES | YES | YES | YES | P/MQ |
| TCEA1 Transcription elongation factor A protein 1                | P10711 | NO  | NO  | YES | YES | YES | YES | P/MQ |
| CD14 Monocyte differentiation antigen CD14                       | P10810 | NO  | NO  | YES | YES | YES | YES | P    |
| 4F2 4F2 cell-surface antigen heavy chain                         | P10852 | YES | YES | YES | YES | YES | YES | P/MQ |
| H2B1M Histone H2B type 1-M                                       | P10854 | NO  | YES | NO  | NO  | NO  | NO  | P    |
| H10 Histone H1.0                                                 | P10922 | YES | YES | YES | YES | YES | YES | P/MQ |
| OSTP Osteopontin                                                 | P10923 | YES | YES | YES | YES | YES | YES | P/MQ |
| TCP4 Activated RNA polymerase II transcriptional coactivator p15 | P11031 | NO  | YES | NO  | YES | YES | YES | P    |
| CO1A1 Collagen alpha-1(I) chain                                  | P11087 | NO  | YES | NO  | YES | YES | YES | P/MQ |
| MPO Myeloperoxidase                                              | P11247 | NO  | YES | YES | YES | YES | YES | P    |
| FABPH Fatty acid-binding protein, heart                          | P11404 | YES | YES | NO  | NO  | NO  | NO  | P    |
| HS90B Heat shock protein HSP 90-beta                             | P11499 | YES | YES | YES | YES | YES | YES | P/MQ |
| NGAL Neutrophil gelatinase-associated lipocalin                  | P11672 | YES | YES | YES | YES | YES | YES | P/MQ |
| K2C8 Keratin, type II cytoskeletal 8                             | P11679 | YES | YES | YES | YES | YES | YES | P/MQ |
| ITB2 Integrin beta-2                                             | P11835 | NO  | YES | YES | YES | YES | YES | P/MQ |
| ANGT Angiotensinogen                                             | P11859 | NO  | YES | NO  | NO  | NO  | NO  | P    |
| GAS2 Growth arrest-specific protein 2                            | P11862 | YES | YES | NO  | NO  | NO  | NO  | P    |
| NUD19 Nucleoside diphosphate-linked moiety X motif 19            | P11930 | NO  | YES | NO  | NO  | NO  | NO  | P    |
| TCPA T-complex protein 1 subunit alpha                           | P11983 | YES | YES | YES | YES | YES | YES | P/MQ |
| A4 Amyloid-beta A4 protein                                       | P12023 | NO  | YES | NO  | NO  | NO  | NO  | P/MQ |





|                                                                        |        |     |     |     |     |     |     |      |
|------------------------------------------------------------------------|--------|-----|-----|-----|-----|-----|-----|------|
| HMOX1 Heme oxygenase 1                                                 | P14901 | NO  | NO  | YES | YES | YES | YES | P    |
| GLUL Glutamine synthetase                                              | P15105 | YES | YES | NO  | NO  | NO  | NO  | P/MQ |
| PMGE Bisphosphoglycerate mutase                                        | P15327 | YES | YES | NO  | NO  | NO  | NO  | P    |
| CD44 CD44 antigen                                                      | P15379 | NO  | YES | NO  | NO  | NO  | NO  | P    |
| NDKA Nucleoside diphosphate kinase A                                   | P15532 | NO  | YES | NO  | NO  | NO  | NO  | P/MQ |
| LEUK Leukosialin                                                       | P15702 | NO  | NO  | NO  | YES | NO  | NO  | P    |
| H12 Histone H1.2                                                       | P15864 | YES | YES | NO  | NO  | YES | YES | P/MQ |
| KLK1 Kallikrein-1                                                      | P15947 | YES | YES | NO  | NO  | YES | NO  | P    |
| LEG1 Galectin-1                                                        | P16045 | NO  | YES | NO  | NO  | NO  | YES | P    |
| LEG3 Galectin-3                                                        | P16110 | YES | YES | YES | YES | YES | YES | P/MQ |
| LDHB L-lactate dehydrogenase B chain                                   | P16125 | YES | YES | YES | YES | YES | YES | P/MQ |
| PH4H Phenylalanine-4-hydroxylase                                       | P16331 | YES | YES | NO  | NO  | NO  | NO  | P    |
| MUTA Methylmalonyl-CoA mutase, mitochondrial                           | P16332 | YES | YES | NO  | NO  | NO  | NO  | P    |
| AMPE Glutamyl aminopeptidase                                           | P16406 | YES | YES | YES | NO  | YES | NO  | P/MQ |
| Argininosuccinate synthase                                             | P16460 | YES | YES | YES | YES | YES | YES | MQ   |
| SPTN1 Spectrin alpha chain, non-erythrocytic 1                         | P16546 | YES | YES | YES | YES | YES | YES | P    |
| PPGB Lysosomal protective protein                                      | P16675 | NO  | YES | NO  | YES | NO  | NO  | P    |
| HMGA1 High mobility group protein HMG-I/HMG-Y                          | P17095 | NO  | YES | NO  | YES | YES | NO  | P/MQ |
| PTBP1 Polypyrimidine tract-binding protein 1                           | P17225 | YES | YES | YES | YES | YES | YES | P/MQ |
| AP2A1 AP-2 complex subunit alpha-1                                     | P17426 | NO  | NO  | NO  | YES | NO  | NO  | P    |
| AP2A2 AP-2 complex subunit alpha-2                                     | P17427 | NO  | YES | NO  | YES | NO  | NO  | P/MQ |
| SBP1 Methanethiol oxidase                                              | P17563 | YES | YES | YES | NO  | YES | NO  | P    |
| COX7C Cytochrome c oxidase subunit 7C, mitochondrial                   | P17665 | NO  | YES | NO  | NO  | NO  | NO  | P    |
| PPIA Peptidyl-prolyl cis-trans isomerase A                             | P17742 | YES | YES | YES | YES | YES | YES | P/MQ |
| GTR1 Solute carrier family 2, facilitated glucose transporter member 1 | P17809 | NO  | NO  | NO  | NO  | YES | NO  | P    |
| PCNA Proliferating cell nuclear antigen                                | P17918 | NO  | NO  | YES | YES | YES | NO  | P/MQ |



|                                                            |        |     |     |     |     |     |     |      |
|------------------------------------------------------------|--------|-----|-----|-----|-----|-----|-----|------|
| LMNB2 Lamin-B2                                             | P21619 | YES | YES | YES | YES | YES | YES | P/MQ |
| TAP1 Antigen peptide transporter 1                         | P21958 | NO  | NO  | NO  | YES | NO  | NO  | P    |
| TGM2 Protein-glutamine gamma-glutamyltransferase 2         | P21981 | YES | YES | YES | YES | YES | YES | P/MQ |
| EMB Embigin                                                | P21995 | NO  | YES | NO  | NO  | YES | NO  | P    |
| HEMH Ferrochelatase, mitochondrial                         | P22315 | NO  | YES | NO  | NO  | NO  | NO  | P    |
| A1AT2 Alpha-1-antitrypsin 1-2                              | P22599 | YES | YES | YES | NO  | YES | NO  | P/MQ |
| CBL E3 ubiquitin-protein ligase CBL                        | P22682 | NO  | YES | NO  | YES | NO  | YES | P    |
| EIF3A Eukaryotic translation initiation factor 3 subunit A | P23116 | YES | YES | YES | YES | YES | YES | P/MQ |
| CBX3 Chromobox protein homolog 3                           | P23198 | YES | YES | YES | YES | YES | YES | P/MQ |
| PNPH Purine nucleoside phosphorylase                       | P23492 | NO  | YES | YES | YES | YES | YES | P/MQ |
| FCL GDP-L-fucose synthase                                  | P23591 | NO  | YES | NO  | YES | NO  | NO  | P    |
| BGAL Beta-galactosidase                                    | P23780 | NO  | YES | NO  | YES | NO  | NO  | P    |
| CRYAB Alpha-crystallin B chain                             | P23927 | NO  | YES | NO  | NO  | NO  | NO  | P    |
| EST1C Carboxylesterase 1C                                  | P23953 | YES | YES | YES | YES | YES | YES | P    |
| CATA Catalase                                              | P24270 | YES | YES | YES | YES | YES | YES | P/MQ |
| PPIB Peptidyl-prolyl cis-trans isomerase B                 | P24369 | YES | YES | YES | YES | YES | YES | P/MQ |
| CAPG Macrophage-capping protein                            | P24452 | YES | YES | YES | YES | YES | YES | P/MQ |
| LKHA4 Leukotriene A-4 hydrolase                            | P24527 | YES | YES | YES | YES | YES | YES | P/MQ |
| IMDH2 Inosine-5'-monophosphate dehydrogenase 2             | P24547 | NO  | YES | YES | YES | YES | NO  | P    |
| AL1A1 Retinal dehydrogenase 1                              | P24549 | NO  | YES | NO  | NO  | NO  | NO  | P    |
| M6PR Cation-dependent mannose-6-phosphate receptor         | P24668 | NO  | YES | NO  | NO  | YES | NO  | P    |
| IL1RA Interleukin-1 receptor antagonist protein            | P25085 | NO  | NO  | NO  | NO  | YES | NO  | P    |
| MCM3 DNA replication licensing factor MCM3                 | P25206 | NO  | NO  | NO  | YES | NO  | YES | P/MQ |
| RS2 40S ribosomal protein S2                               | P25444 | YES | YES | YES | YES | YES | YES | P/MQ |
| LYN Tyrosine-protein kinase Lyn                            | P25911 | NO  | NO  | NO  | YES | YES | NO  | P    |
| UBF1 Nucleolar transcription factor 1                      | P25976 | NO  | YES | YES | YES | YES | YES | P/MQ |

|                                                           |        |     |     |     |     |     |     |      |
|-----------------------------------------------------------|--------|-----|-----|-----|-----|-----|-----|------|
| TLN1 Talin-1                                              | P26039 | YES | YES | YES | YES | YES | YES | P/MQ |
| EZRI Ezrin                                                | P26040 | YES | YES | YES | YES | YES | YES | P/MQ |
| MOES Moesin                                               | P26041 | YES | YES | YES | YES | YES | YES | P/MQ |
| RADI Radixin                                              | P26043 | YES | YES | YES | YES | YES | YES | P/MQ |
| CTNA1 Catenin alpha-1                                     | P26231 | YES | YES | YES | YES | YES | YES | P/MQ |
| PTMA Prothymosin alpha                                    | P26350 | YES | YES | YES | YES | YES | YES | P/MQ |
| U2AF2 Splicing factor U2AF 65 kDa subunit                 | P26369 | NO  | NO  | NO  | YES | YES | NO  | P    |
| GLUD1 Glutamate dehydrogenase 1, mitochondrial            | P26443 | YES | YES | YES | YES | YES | YES | P/MQ |
| PSMD7 26S proteasome non-ATPase regulatory subunit 7      | P26516 | NO  | YES | NO  | YES | NO  | YES | P    |
| SYSC Serine--tRNA ligase, cytoplasmic                     | P26638 | YES | YES | YES | YES | YES | YES | P    |
| MARCS Myristoylated alanine-rich C-kinase substrate       | P26645 | NO  | YES | YES | YES | YES | YES | P/MQ |
| FKB1A Peptidyl-prolyl cis-trans isomerase FKBP1A          | P26883 | NO  | YES | NO  | YES | YES | NO  | P/MQ |
| MA2A1 Alpha-mannosidase 2                                 | P27046 | NO  | NO  | NO  | YES | NO  | NO  | P    |
| MAP4 Microtubule-associated protein 4                     | P27546 | YES | YES | YES | YES | YES | YES | P/MQ |
| GNA13 Guanine nucleotide-binding protein subunit alpha-13 | P27601 | NO  | NO  | NO  | YES | NO  | NO  | P    |
| PLAP Phospholipase A-2-activating protein                 | P27612 | YES | YES | NO  | YES | YES | YES | P/MQ |
| XRCC5 X-ray repair cross-complementing protein 5          | P27641 | NO  | YES | NO  | NO  | NO  | NO  | P    |
| RL3 60S ribosomal protein L3                              | P27659 | YES | YES | YES | YES | YES | YES | P/MQ |
| H2AX Histone H2AX                                         | P27661 | NO  | NO  | NO  | YES | NO  | NO  | P/MQ |
| PDIA3 Protein disulfide-isomerase A3                      | P27773 | YES | YES | YES | YES | YES | YES | P/MQ |
| VAV Proto-oncogene vav                                    | P27870 | NO  | NO  | NO  | YES | NO  | NO  | P    |
| HNF1B Hepatocyte nuclear factor 1-beta                    | P27889 | NO  | YES | NO  | NO  | NO  | NO  | P    |
| PSB8 Proteasome subunit beta type-8                       | P28063 | NO  | NO  | NO  | YES | YES | YES | P    |
| ACOC Cytoplasmic aconitate hydratase                      | P28271 | YES | YES | YES | YES | YES | YES | P/MQ |
| CTSG Cathepsin G                                          | P28293 | NO  | NO  | YES | YES | YES | YES | P    |
| APEX1 DNA-(apurinic or apyrimidinic site) lyase           | P28352 | NO  | YES | YES | YES | YES | YES | P/MQ |





|                                                         |        |     |     |     |     |     |     |      |
|---------------------------------------------------------|--------|-----|-----|-----|-----|-----|-----|------|
| CALX Calnexin                                           | P35564 | YES | YES | NO  | YES | YES | YES | P/MQ |
| AP1M1 AP-1 complex subunit mu-1                         | P35585 | NO  | YES | YES | YES | YES | NO  | P/MQ |
| PRDX1 Peroxiredoxin-1                                   | P35700 | YES | YES | YES | YES | YES | YES | P/MQ |
| PTN1 Tyrosine-protein phosphatase non-receptor type 1   | P35821 | NO  | NO  | NO  | YES | NO  | NO  | P    |
| PTN12 Tyrosine-protein phosphatase non-receptor type 12 | P35831 | NO  | NO  | NO  | YES | NO  | YES | P    |
| RL12 60S ribosomal protein L12                          | P35979 | YES | YES | YES | YES | YES | YES | P/MQ |
| RL18 60S ribosomal protein L18                          | P35980 | YES | YES | YES | YES | YES | YES | P/MQ |
| TAP2 Antigen peptide transporter 2                      | P36371 | NO  | NO  | NO  | YES | NO  | YES | P    |
| PPM1B Protein phosphatase 1B                            | P36993 | NO  | YES | NO  | NO  | YES | NO  | P    |
| NCPR NADPH--cytochrome P450 reductase                   | P37040 | YES | YES | YES | YES | YES | YES | P/MQ |
| TAGL Transgelin                                         | P37804 | YES | YES | YES | YES | YES | YES | P/MQ |
| FBLN2 Fibulin-2                                         | P37889 | NO  | NO  | NO  | YES | NO  | YES | P    |
| HMGCL Hydroxymethylglutaryl-CoA lyase, mitochondrial    | P38060 | YES | YES | NO  | NO  | NO  | NO  | P    |
| GRP75 Stress-70 protein, mitochondrial                  | P38647 | YES | YES | YES | YES | YES | YES | P/MQ |
| DYN2 Dynamin-2                                          | P39054 | YES | YES | YES | YES | YES | YES | P/MQ |
| CO1A1 Collagen alpha-1(XVIII) chain                     | P39061 | YES | YES | YES | YES | YES | YES | P/MQ |
| MA1A2 Mannosyl-oligosaccharide 1,2-alpha-mannosidase IB | P39098 | NO  | YES | NO  | NO  | NO  | NO  | P    |
| ZO1 Tight junction protein ZO-1                         | P39447 | YES | YES | NO  | YES | YES | YES | P/MQ |
| CAP1 Adenylyl cyclase-associated protein 1              | P40124 | YES | YES | YES | YES | YES | YES | P/MQ |
| CHD1 Chromodomain-helicase-DNA-binding protein 1        | P40201 | NO  | YES | NO  | NO  | NO  | NO  | P    |
| VP26A Vacuolar protein sorting-associated protein 26A   | P40336 | YES | YES | NO  | NO  | YES | NO  | P    |
| TFAM Transcription factor A, mitochondrial              | P40630 | YES | NO  | NO  | NO  | YES | NO  | P    |
| RL28 60S ribosomal protein L28                          | P41105 | NO  | YES | YES | YES | YES | YES | P/MQ |
| ACSL1 Long-chain-fatty-acid--CoA ligase 1               | P41216 | YES | YES | NO  | NO  | YES | NO  | P/MQ |
| CSK Tyrosine-protein kinase CSK                         | P41241 | NO  | NO  | NO  | YES | NO  | NO  | P    |

|                                                          |        |     |     |     |     |     |     |      |
|----------------------------------------------------------|--------|-----|-----|-----|-----|-----|-----|------|
| MMP9 Matrix metalloproteinase-9                          | P41245 | NO  | NO  | YES | YES | NO  | YES | P/MQ |
| SEPT2 Septin-2                                           | P42208 | YES | YES | YES | YES | YES | YES | P/MQ |
| STAT1 Signal transducer and activator of transcription 1 | P42225 | NO  | YES | YES | YES | YES | YES | P/MQ |
| STAT3 Signal transducer and activator of transcription 3 | P42227 | NO  | NO  | NO  | YES | NO  | YES | P    |
| EPS15 Epidermal growth factor receptor substrate 15      | P42567 | NO  | YES | YES | YES | YES | YES | P/MQ |
| TCPQ T-complex protein 1 subunit theta                   | P42932 | YES | YES | YES | YES | YES | YES | P/MQ |
| H14 Histone H1.4                                         | P43274 | YES | YES | YES | YES | YES | YES | P/MQ |
| H11 Histone H1.1                                         | P43275 | YES | YES | YES | YES | YES | YES | P/MQ |
| H15 Histone H1.5                                         | P43276 | YES | YES | YES | YES | YES | YES | P/MQ |
| H13 Histone H1.3                                         | P43277 | YES | YES | YES | YES | YES | YES | P/MQ |
| ITAV Integrin alpha-V                                    | P43406 | NO  | YES | NO  | NO  | NO  | NO  | P    |
| PLIN2 Perilipin-2                                        | P43883 | NO  | NO  | NO  | YES | YES | YES | P    |
| ALDR Aldose reductase                                    | P45376 | YES | YES | YES | YES | YES | YES | P/MQ |
| COF2 Cofilin-2                                           | P45591 | NO  | YES | NO  | NO  | NO  | NO  | P    |
| FKBP2 Peptidyl-prolyl cis-trans isomerase FKBP2          | P45878 | NO  | YES | NO  | NO  | NO  | NO  | P    |
| CDN1B Cyclin-dependent kinase inhibitor 1B               | P46414 | NO  | YES | NO  | YES | YES | YES | P/MQ |
| NSF Vesicle-fusing ATPase                                | P46460 | YES | YES | YES | YES | YES | YES | P/MQ |
| VPS4B Vacuolar protein sorting-associated protein 4B     | P46467 | NO  | NO  | NO  | YES | YES | YES | P    |
| PRS7 26S proteasome regulatory subunit 7                 | P46471 | YES | YES | YES | YES | YES | YES | P/MQ |
| RB11B Ras-related protein Rab-11B                        | P46638 | YES | NO  | NO  | YES | YES | NO  | P/MQ |
| ADX Adrenodoxin, mitochondrial                           | P46656 | NO  | YES | NO  | NO  | NO  | NO  | P    |
| PURA2 Adenylosuccinate synthetase isozyme 2              | P46664 | NO  | NO  | NO  | YES | YES | NO  | P    |
| YAP1 Transcriptional coactivator YAP1                    | P46938 | NO  | YES | NO  | YES | NO  | NO  | P    |
| QOR Quinone oxidoreductase                               | P47199 | YES | YES | YES | YES | YES | YES | P/MQ |
| TES Testin                                               | P47226 | NO  | NO  | NO  | YES | NO  | NO  | P    |
| PA24A Cytosolic phospholipase A2                         | P47713 | NO  | NO  | NO  | YES | NO  | NO  | P    |



|                                                         |        |     |     |     |     |     |     |      |
|---------------------------------------------------------|--------|-----|-----|-----|-----|-----|-----|------|
| ALDH2 Aldehyde dehydrogenase, mitochondrial             | P47738 | YES | YES | YES | YES | YES | YES | P/MQ |
| AL3A2 Fatty aldehyde dehydrogenase                      | P47740 | YES | YES | NO  | YES | NO  | YES | P/MQ |
| CAZA1 F-actin-capping protein subunit alpha-1           | P47753 | NO  | YES | YES | YES | YES | YES | P/MQ |
| CAZA2 F-actin-capping protein subunit alpha-2           | P47754 | YES | YES | YES | YES | YES | YES | P/MQ |
| CAPZB F-actin-capping protein subunit beta              | P47757 | YES | YES | YES | YES | YES | YES | P/MQ |
| SRPRB Signal recognition particle receptor subunit beta | P47758 | NO  | YES | NO  | YES | NO  | YES | P/MQ |
| RL6 60S ribosomal protein L6                            | P47911 | YES | YES | YES | YES | YES | YES | P/MQ |
| RL29 60S ribosomal protein L29                          | P47915 | YES | NO  | YES | YES | YES | YES | P    |
| CRAT Carnitine O-acetyltransferase                      | P47934 | YES | YES | NO  | NO  | NO  | NO  | P    |
| CRKL Crk-like protein                                   | P47941 | NO  | YES | NO  | YES | NO  | NO  | P/MQ |
| RLA1 60S acidic ribosomal protein P1                    | P47955 | NO  | NO  | NO  | YES | NO  | NO  | P    |
| RL5 60S ribosomal protein L5                            | P47962 | YES | YES | YES | YES | YES | YES | P/MQ |
| RL13 60S ribosomal protein L13                          | P47963 | YES | YES | YES | YES | YES | YES | P/MQ |
| RL36 60S ribosomal protein L36                          | P47964 | NO  | YES | NO  | NO  | NO  | NO  | P    |
| EIF1 Eukaryotic translation initiation factor 1         | P48024 | NO  | NO  | NO  | YES | YES | NO  | P/MQ |
| KSYK Tyrosine-protein kinase SYK                        | P48025 | NO  | NO  | NO  | YES | YES | YES | P    |
| ANXA5 Annexin A5                                        | P48036 | YES | YES | YES | YES | YES | YES | P/MQ |
| 41 Protein 4.1                                          | P48193 | YES | YES | YES | YES | YES | NO  | P/MQ |
| TBCA Tubulin-specific chaperone A                       | P48428 | NO  | YES | NO  | YES | YES | YES | P    |
| LMNA Prelamin-A/C                                       | P48678 | YES | YES | YES | YES | YES | YES | P/MQ |
| HS74L Heat shock 70 kDa protein 4L                      | P48722 | YES | NO  | NO  | NO  | YES | NO  | P    |
| CBR1 Carbonyl reductase [NADPH] 1                       | P48758 | YES | YES | YES | YES | YES | YES | P/MQ |
| CX7A2 Cytochrome c oxidase subunit 7A2, mitochondrial   | P48771 | NO  | YES | NO  | NO  | NO  | NO  | P    |
| ADT1 ADP/ATP translocase 1                              | P48962 | NO  | YES | NO  | NO  | NO  | NO  | P    |
| MAPK2 MAP kinase-activated protein kinase 2             | P49138 | NO  | NO  | NO  | YES | NO  | NO  | P    |
| HEP2 Heparin cofactor 2                                 | P49182 | NO  | YES | NO  | NO  | NO  | NO  | P    |

|                                                                  |        |     |     |     |     |     |     |      |
|------------------------------------------------------------------|--------|-----|-----|-----|-----|-----|-----|------|
| ROA1 Heterogeneous nuclear ribonucleoprotein A1                  | P49312 | YES | YES | YES | YES | YES | YES | P/MQ |
| INPP Inositol polyphosphate 1-phosphatase                        | P49442 | NO  | NO  | NO  | YES | YES | NO  | P    |
| PPM1A Protein phosphatase 1A                                     | P49443 | NO  | NO  | NO  | YES | NO  | NO  | P    |
| PCY1A Choline-phosphate cytidyltransferase A                     | P49586 | NO  | YES | NO  | NO  | YES | NO  | P/MQ |
| HCLS1 Hematopoietic lineage cell-specific protein                | P49710 | YES | YES | YES | YES | YES | YES | P/MQ |
| MCM5 DNA replication licensing factor MCM5                       | P49718 | NO  | NO  | NO  | YES | NO  | NO  | P    |
| PSA2 Proteasome subunit alpha type-2                             | P49722 | YES | YES | YES | YES | YES | YES | P/MQ |
| ODBA 2-oxoisovalerate dehydrogenase subunit alpha, mitochondrial | P50136 | NO  | YES | NO  | NO  | NO  | NO  | P    |
| DHB8 Estradiol 17-beta-dehydrogenase 8                           | P50171 | YES | YES | NO  | NO  | NO  | NO  | P    |
| SAHH Adenosylhomocysteinase                                      | P50247 | YES | YES | YES | YES | YES | YES | P/MQ |
| FMO1 Dimethylaniline monooxygenase [N-oxide-forming] 1           | P50285 | NO  | YES | NO  | NO  | NO  | NO  | P    |
| GDIA Rab GDP dissociation inhibitor alpha                        | P50396 | NO  | NO  | NO  | NO  | YES | NO  | P    |
| ARSB Arylsulfatase B                                             | P50429 | NO  | YES | NO  | NO  | NO  | NO  | P    |
| GLYC Serine hydroxymethyltransferase, cytosolic                  | P50431 | NO  | YES | NO  | NO  | NO  | NO  | P    |
| VATA V-type proton ATPase catalytic subunit A                    | P50516 | YES | YES | YES | YES | YES | YES | P/MQ |
| VATE1 V-type proton ATPase subunit E 1                           | P50518 | YES | YES | YES | YES | YES | YES | P/MQ |
| S10AB Protein S100-A11                                           | P50543 | NO  | YES | NO  | YES | YES | YES | P    |
| PA2G4 Proliferation-associated protein 2G4                       | P50580 | YES | YES | YES | YES | YES | YES | P/MQ |
| ICAL Calpastatin                                                 | P51125 | NO  | YES | YES | YES | YES | YES | P/MQ |
| RAB7A Ras-related protein Rab-7a                                 | P51150 | YES | YES | YES | YES | YES | YES | P/MQ |
| RL9 60S ribosomal protein L9                                     | P51410 | YES | YES | YES | YES | YES | NO  | P    |
| CAMP Cathelicidin antimicrobial peptide                          | P51437 | NO  | NO  | NO  | YES | NO  | NO  | P    |
| DHB4 Peroxisomal multifunctional enzyme type 2                   | P51660 | YES | YES | YES | YES | YES | YES | P/MQ |
| DYL1 Dynein light chain Tctex-type 1                             | P51807 | NO  | NO  | NO  | YES | NO  | NO  | P    |
| HDGF Hepatoma-derived growth factor                              | P51859 | YES | YES | YES | YES | YES | YES | P/MQ |
| VA0D1 V-type proton ATPase subunit d 1                           | P51863 | YES | NO  | NO  | YES | YES | NO  | P    |

|                                                                                                                 |        |     |     |     |     |     |     |      |
|-----------------------------------------------------------------------------------------------------------------|--------|-----|-----|-----|-----|-----|-----|------|
| FABP7 Fatty acid-binding protein, brain                                                                         | P51880 | NO  | YES | NO  | NO  | NO  | NO  | P    |
| ADT2 ADP/ATP translocase 2                                                                                      | P51881 | YES | YES | YES | YES | YES | YES | P/MQ |
| LUM Lumican                                                                                                     | P51885 | NO  | YES | NO  | YES | YES | YES | P/MQ |
| THTR Thiosulfate sulfurtransferase                                                                              | P52196 | YES | YES | NO  | NO  | NO  | NO  | P    |
| NDUS6 NADH dehydrogenase [ubiquinone] iron-sulfur protein 6, mitochondrial                                      | P52503 | YES | YES | YES | NO  | NO  | NO  | P    |
| UCK1 Uridine-cytidine kinase 1                                                                                  | P52623 | NO  | YES | NO  | NO  | NO  | NO  | P    |
| RIDA 2-iminobutanoate/2-iminopropanoate deaminase                                                               | P52760 | YES | YES | YES | YES | YES | NO  | P/MQ |
| EFNB1 Ephrin-B1                                                                                                 | P52795 | NO  | YES | NO  | NO  | NO  | NO  | P    |
| CPT2 Carnitine O-palmitoyltransferase 2, mitochondrial                                                          | P52825 | YES | YES | NO  | NO  | NO  | NO  | P    |
| RL10A 60S ribosomal protein L10a                                                                                | P53026 | YES | YES | NO  | YES | YES | YES | P/MQ |
| ODB2 Lipoamide acyltransferase component of branched-chain alpha-keto acid dehydrogenase complex, mitochondrial | P53395 | YES | YES | NO  | NO  | NO  | NO  | P    |
| KPYR Pyruvate kinase PKLR                                                                                       | P53657 | YES | YES | NO  | NO  | NO  | NO  | P    |
| PIPNB Phosphatidylinositol transfer protein beta isoform                                                        | P53811 | NO  | YES | NO  | NO  | NO  | NO  | P    |
| MOT1 Monocarboxylate transporter 1                                                                              | P53986 | NO  | YES | NO  | NO  | NO  | NO  | P/MQ |
| RAB2A Ras-related protein Rab-2A                                                                                | P53994 | YES | YES | NO  | YES | YES | YES | P/MQ |
| STOM Erythrocyte band 7 integral membrane protein                                                               | P54116 | NO  | NO  | NO  | NO  | YES | NO  | P/MQ |
| STMN1 Stathmin                                                                                                  | P54227 | YES | YES | YES | YES | YES | YES | P/MQ |
| RD23A UV excision repair protein RAD23 homolog A                                                                | P54726 | NO  | YES | NO  | NO  | NO  | NO  | P    |
| RD23B UV excision repair protein RAD23 homolog B                                                                | P54728 | NO  | YES | NO  | YES | NO  | YES | P/MQ |
| NUB1 NEDD8 ultimate buster 1                                                                                    | P54729 | NO  | YES | NO  | NO  | NO  | NO  | P    |
| FAF1 FAS-associated factor 1                                                                                    | P54731 | NO  | YES | NO  | NO  | NO  | NO  | P    |
| PRS6B 26S proteasome regulatory subunit 6B                                                                      | P54775 | NO  | YES | NO  | YES | YES | YES | P/MQ |
| PUR8 Adenylosuccinate lyase                                                                                     | P54822 | NO  | YES | NO  | YES | NO  | NO  | P    |
| DDX6 Probable ATP-dependent RNA helicase DDX6                                                                   | P54823 | NO  | YES | YES | YES | YES | YES | P/MQ |



|                                                            |        |     |     |     |     |     |     |      |
|------------------------------------------------------------|--------|-----|-----|-----|-----|-----|-----|------|
| RT21 28S ribosomal protein S21, mitochondrial              | P58059 | NO  | YES | NO  | NO  | NO  | NO  | P    |
| EF2 Elongation factor 2                                    | P58252 | YES | YES | YES | YES | YES | YES | P/MQ |
| OPA1 Dynamin-like 120 kDa protein, mitochondrial           | P58281 | NO  | YES | NO  | NO  | NO  | NO  | P    |
| PTPA Serine/threonine-protein phosphatase 2A activator     | P58389 | NO  | YES | NO  | YES | NO  | NO  | P    |
| STRN4 Striatin-4                                           | P58404 | NO  | YES | NO  | NO  | NO  | NO  | P    |
| TPM1 Tropomyosin alpha-1 chain                             | P58771 | YES | YES | YES | YES | YES | YES | P    |
| TPM2 Tropomyosin beta chain                                | P58774 | YES | YES | YES | YES | YES | YES | P    |
| TB182 182 kDa tankyrase-1-binding protein                  | P58871 | YES | YES | YES | YES | YES | YES | P/MQ |
| B2L13 Bcl-2-like protein 13                                | P59017 | NO  | YES | NO  | NO  | NO  | NO  | P    |
| S12A3 Solute carrier family 12 member 3                    | P59158 | NO  | YES | NO  | NO  | NO  | NO  | P    |
| CING Cingulin                                              | P59242 | NO  | YES | NO  | NO  | NO  | NO  | P    |
| IF5 Eukaryotic translation initiation factor 5             | P59325 | NO  | NO  | NO  | YES | NO  | YES | P    |
| ANS1A Ankyrin repeat and SAM domain-containing protein 1A  | P59672 | NO  | YES | NO  | NO  | NO  | NO  | P    |
| ARPC4 Actin-related protein 2/3 complex subunit 4          | P59999 | YES | YES | YES | YES | YES | YES | P/MQ |
| RUVB1 RuvB-like 1                                          | P60122 | NO  | NO  | YES | YES | YES | YES | P/MQ |
| EIF3E Eukaryotic translation initiation factor 3 subunit E | P60229 | NO  | YES | NO  | NO  | NO  | NO  | P    |
| PCBP1 Poly(rC)-binding protein 1                           | P60335 | YES | YES | YES | YES | YES | YES | P/MQ |
| ACTB Actin, cytoplasmic 1                                  | P60710 | YES | YES | YES | YES | YES | YES | P    |
| CDC42 Cell division control protein 42 homolog             | P60766 | YES | YES | NO  | YES | YES | YES | P/MQ |
| CIRBP Cold-inducible RNA-binding protein                   | P60824 | NO  | YES | NO  | NO  | NO  | NO  | P    |
| IF4A1 Eukaryotic initiation factor 4A-I                    | P60843 | YES | YES | YES | YES | YES | YES | P/MQ |
| RS20 40S ribosomal protein S20                             | P60867 | YES | YES | NO  | YES | YES | YES | P/MQ |
| RAB5B Ras-related protein Rab-5B                           | P61021 | YES | YES | YES | YES | YES | YES | P/MQ |
| CHP1 Calcineurin B homologous protein 1                    | P61022 | NO  | YES | NO  | YES | NO  | NO  | P    |
| RAB10 Ras-related protein Rab-10                           | P61027 | YES | YES | YES | YES | YES | YES | P/MQ |
| RAB8B Ras-related protein Rab-8B                           | P61028 | NO  | YES | NO  | YES | YES | YES | P/MQ |

|                                                                       |        |     |     |     |     |     |     |      |
|-----------------------------------------------------------------------|--------|-----|-----|-----|-----|-----|-----|------|
| UBC12 NEDD8-conjugating enzyme Ubc12                                  | P61082 | NO  | YES | NO  | NO  | NO  | NO  | P    |
| UBE2K Ubiquitin-conjugating enzyme E2 K                               | P61087 | NO  | YES | NO  | NO  | YES | YES | P    |
| UBE2N Ubiquitin-conjugating enzyme E2 N                               | P61089 | YES | YES | YES | YES | YES | YES | P/MQ |
| ARP2 Actin-related protein 2                                          | P61161 | YES | NO  | YES | YES | YES | YES | P/MQ |
| ACTZ Alpha-centractin                                                 | P61164 | NO  | YES | NO  | YES | YES | NO  | P    |
| ABCE1 ATP-binding cassette sub-family E member 1                      | P61222 | NO  | NO  | NO  | NO  | YES | NO  | P    |
| RL26 60S ribosomal protein L26                                        | P61255 | YES | YES | YES | YES | YES | YES | P/MQ |
| PSME3 Proteasome activator complex subunit 3                          | P61290 | NO  | NO  | NO  | YES | YES | YES | P/MQ |
| RAB6B Ras-related protein Rab-6B                                      | P61294 | YES | YES | NO  | NO  | NO  | NO  | P    |
| RL27 60S ribosomal protein L27                                        | P61358 | YES | YES | YES | YES | YES | YES | P/MQ |
| PHS Pterin-4-alpha-carbinolamine dehydratase                          | P61458 | NO  | YES | NO  | NO  | NO  | NO  | P    |
| ARF4 ADP-ribosylation factor 4                                        | P61750 | NO  | YES | NO  | NO  | NO  | NO  | P/MQ |
| GABT 4-aminobutyrate aminotransferase, mitochondrial                  | P61922 | NO  | YES | NO  | NO  | NO  | NO  | P    |
| COPZ1 Coatomer subunit zeta-1                                         | P61924 | NO  | NO  | NO  | YES | YES | NO  | P/MQ |
| SUMO2 Small ubiquitin-related modifier 2                              | P61957 | YES | YES | NO  | YES | NO  | NO  | P/MQ |
| UFM1 Ubiquitin-fold modifier 1                                        | P61961 | NO  | YES | NO  | YES | NO  | NO  | P/MQ |
| AP1S1 AP-1 complex subunit sigma-1A                                   | P61967 | NO  | YES | NO  | NO  | NO  | NO  | P/MQ |
| HNRPK Heterogeneous nuclear ribonucleoprotein K                       | P61979 | YES | YES | YES | YES | YES | YES | P/MQ |
| 1433G 14-3-3 protein gamma                                            | P61982 | YES | YES | YES | YES | YES | YES | P/MQ |
| TIM13 Mitochondrial import inner membrane translocase subunit Tim13   | P62075 | YES | YES | NO  | NO  | YES | NO  | P    |
| Mitochondrial import inner membrane translocase subunit Tim8 B        | P62077 | YES | YES | YES | YES | YES | YES | MQ   |
| RS7 40S ribosomal protein S7                                          | P62082 | NO  | YES | NO  | YES | YES | NO  | P    |
| PP1A Serine/threonine-protein phosphatase PP1-alpha catalytic subunit | P62137 | YES | YES | YES | YES | YES | YES | P/MQ |
| PRS4 26S proteasome regulatory subunit 4                              | P62192 | YES | YES | NO  | YES | YES | YES | P/MQ |
| PRS8 26S proteasome regulatory subunit 8                              | P62196 | NO  | YES | YES | YES | YES | YES | P/MQ |

|                                                     |        |     |     |     |     |     |     |      |
|-----------------------------------------------------|--------|-----|-----|-----|-----|-----|-----|------|
| RS8 40S ribosomal protein S8                        | P62242 | YES | YES | YES | YES | YES | YES | P/MQ |
| RS15A 40S ribosomal protein S15a                    | P62245 | YES | YES | NO  | YES | YES | YES | P/MQ |
| 1433E 14-3-3 protein epsilon                        | P62259 | YES | YES | YES | YES | YES | YES | P/MQ |
| RS14 40S ribosomal protein S14                      | P62264 | YES | YES | YES | YES | YES | YES | P/MQ |
| RS23 40S ribosomal protein S23                      | P62267 | YES | YES | YES | YES | YES | YES | P/MQ |
| RS18 40S ribosomal protein S18                      | P62270 | YES | YES | YES | YES | YES | YES | P/MQ |
| RS29 40S ribosomal protein S29                      | P62274 | NO  | NO  | NO  | YES | NO  | NO  | P    |
| RS11 40S ribosomal protein S11                      | P62281 | NO  | YES | YES | YES | YES | YES | P/MQ |
| RS13 40S ribosomal protein S13                      | P62301 | YES | YES | YES | YES | YES | YES | P/MQ |
| LSM3 U6 snRNA-associated Sm-like protein LSm3       | P62311 | NO  | YES | NO  | NO  | NO  | YES | P    |
| LSM6 U6 snRNA-associated Sm-like protein LSm6       | P62313 | NO  | YES | NO  | NO  | NO  | NO  | P    |
| SMD2 Small nuclear ribonucleoprotein Sm D2          | P62317 | YES | YES | YES | YES | YES | YES | P/MQ |
| PRS10 26S proteasome regulatory subunit 10B         | P62334 | YES | YES | YES | YES | YES | YES | P/MQ |
| RB11A Ras-related protein Rab-11A                   | P62492 | NO  | YES | NO  | NO  | NO  | NO  | P    |
| RS4X 40S ribosomal protein S4, X isoform            | P62500 | YES | YES | NO  | NO  | NO  | NO  | P/MQ |
| DLRB1 Dynein light chain roadblock-type 1           | P62627 | NO  | YES | NO  | NO  | NO  | NO  | P/MQ |
| RS4X 40S ribosomal protein S4, X isoform            | P62702 | YES | YES | YES | YES | YES | YES | P/MQ |
| RL18A 60S ribosomal protein L18a                    | P62717 | NO  | NO  | NO  | YES | YES | NO  | P    |
| ACTA Actin, aortic smooth muscle                    | P62737 | NO  | YES | NO  | NO  | NO  | NO  | P/MQ |
| HPCL1 Hippocalcin-like protein 1                    | P62748 | NO  | NO  | NO  | NO  | YES | NO  | P    |
| RL23A 60S ribosomal protein L23a                    | P62751 | YES | YES | YES | YES | YES | YES | P/MQ |
| RS6 40S ribosomal protein S6                        | P62754 | YES | YES | YES | YES | YES | YES | P/MQ |
| MTPN Myotrophin                                     | P62774 | YES | YES | NO  | YES | YES | YES | P/MQ |
| H4 Histone H4                                       | P62806 | YES | YES | YES | YES | YES | YES | P/MQ |
| VATB2 V-type proton ATPase subunit B, brain isoform | P62814 | YES | YES | YES | YES | YES | YES | P/MQ |
| RAB1A Ras-related protein Rab-1A                    | P62821 | YES | YES | YES | YES | YES | YES | P/MQ |
| RAN GTP-binding nuclear protein Ran                 | P62827 | YES | YES | YES | YES | YES | YES | P/MQ |
| RL23 60S ribosomal protein L23                      | P62830 | NO  | YES | YES | YES | YES | YES | P    |





|                                                                               |        |     |     |     |     |     |     |      |
|-------------------------------------------------------------------------------|--------|-----|-----|-----|-----|-----|-----|------|
| MAPK1 Mitogen-activated protein kinase 1                                      | P63085 | NO  | YES | NO  | NO  | NO  | NO  | P    |
| PP1G Serine/threonine-protein phosphatase PP1-gamma catalytic subunit         | P63087 | NO  | YES | YES | YES | YES | YES | P/MQ |
| 1433Z 14-3-3 protein zeta/delta                                               | P63101 | YES | YES | YES | YES | YES | YES | P/MQ |
| HMGB1 High mobility group protein B1                                          | P63158 | YES | YES | YES | YES | YES | YES | P/MQ |
| Small ubiquitin-related modifier 1                                            | P63166 | NO  | YES | YES | YES | NO  | YES | MQ   |
| DYL1 Dynein light chain 1, cytoplasmic                                        | P63168 | NO  | NO  | NO  | YES | YES | NO  | P    |
| IF5A1 Eukaryotic translation initiation factor 5A-1                           | P63242 | YES | YES | YES | YES | YES | YES | P/MQ |
| Actin, cytoplasmic 2                                                          | P63260 | YES | YES | YES | YES | YES | YES | MQ   |
| RALA Ras-related protein Ral-A                                                | P63321 | NO  | YES | NO  | NO  | NO  | NO  | P    |
| RS12 40S ribosomal protein S12                                                | P63323 | NO  | YES | YES | YES | NO  | YES | P    |
| RS10 40S ribosomal protein S10                                                | P63325 | NO  | YES | YES | YES | YES | YES | P/MQ |
| PP2AA Serine/threonine-protein phosphatase 2A catalytic subunit alpha isoform | P63330 | NO  | YES | NO  | YES | YES | YES | P    |
| PHB Prohibitin                                                                | P67778 | YES | YES | YES | YES | YES | YES | P/MQ |
| RL22 60S ribosomal protein L22                                                | P67984 | YES | YES | YES | YES | YES | YES | P/MQ |
| ACTC Actin, alpha cardiac muscle 1                                            | P68033 | NO  | YES | YES | YES | YES | NO  | P/MQ |
| UB2L3 Ubiquitin-conjugating enzyme E2 L3                                      | P68037 | YES | YES | YES | YES | YES | YES | P    |
| RACK1 Receptor of activated protein C kinase 1                                | P68040 | YES | YES | YES | YES | YES | YES | P/MQ |
| 1433T 14-3-3 protein theta                                                    | P68254 | YES | YES | YES | YES | YES | YES | P/MQ |
| TBA4A Tubulin alpha-4A chain                                                  | P68368 | YES | YES | YES | YES | YES | YES | P/MQ |
| TBB4B Tubulin beta-4B chain                                                   | P68372 | YES | YES | YES | YES | YES | YES | P/MQ |
| TBA1C Tubulin alpha-1C chain                                                  | P68373 | YES | YES | YES | YES | YES | YES | P/MQ |
| 1433F 14-3-3 protein eta                                                      | P68510 | YES | YES | YES | YES | YES | YES | P/MQ |
| IMB1 Importin subunit beta-1                                                  | P70168 | NO  | YES | NO  | YES | YES | NO  | P    |
| PSB7 Proteasome subunit beta type-7                                           | P70195 | NO  | YES | NO  | NO  | NO  | NO  | P    |
| MYO1F Unconventional myosin-1f                                                | P70248 | NO  | NO  | NO  | YES | NO  | YES | P/MQ |
| PKN1 Serine/threonine-protein kinase N1                                       | P70268 | NO  | YES | NO  | YES | NO  | NO  | P    |

|                                                                                  |        |     |     |     |     |     |     |      |
|----------------------------------------------------------------------------------|--------|-----|-----|-----|-----|-----|-----|------|
| PDLI4 PDZ and LIM domain protein 4                                               | P70271 | NO  | NO  | NO  | YES | NO  | NO  | P    |
| EM55 55 kDa erythrocyte membrane protein                                         | P70290 | YES | YES | YES | NO  | YES | NO  | P    |
| PEBP1 Phosphatidylethanolamine-binding protein 1                                 | P70296 | YES | YES | YES | YES | YES | YES | P/MQ |
| STIM1 Stromal interaction molecule 1                                             | P70302 | NO  | NO  | NO  | YES | NO  | NO  | P    |
| WASP Wiskott-Aldrich syndrome protein homolog                                    | P70315 | NO  | YES | YES | YES | YES | YES | P    |
| TIAR Nucleolysin TIAR                                                            | P70318 | NO  | YES | NO  | NO  | NO  | NO  | P    |
| HNRH2 Heterogeneous nuclear ribonucleoprotein H2                                 | P70333 | NO  | YES | NO  | NO  | NO  | NO  | P    |
| ROCK1 Rho-associated protein kinase 1                                            | P70335 | NO  | NO  | NO  | YES | NO  | NO  | P    |
| FRAT1 Proto-oncogene FRAT1                                                       | P70339 | NO  | YES | NO  | NO  | NO  | NO  | P    |
| HINT1 Histidine triad nucleotide-binding protein 1                               | P70349 | YES | YES | YES | YES | YES | YES | P/MQ |
| ELAV1 ELAV-like protein 1                                                        | P70372 | YES | NO  | YES | YES | YES | YES | P/MQ |
| TP53B TP53-binding protein 1                                                     | P70399 | NO  | NO  | NO  | YES | NO  | NO  | P    |
| MYBPH Myosin-binding protein H                                                   | P70402 | NO  | YES | NO  | NO  | NO  | NO  | P    |
| NHRF1 Na(+)/H(+) exchange regulatory cofactor NHE-RF1                            | P70441 | YES | YES | YES | YES | YES | YES | P/MQ |
| BID BH3-interacting domain death agonist                                         | P70444 | NO  | YES | NO  | NO  | NO  | NO  | P    |
| STX4 Syntaxin-4                                                                  | P70452 | NO  | NO  | NO  | YES | NO  | NO  | P    |
| VASP Vasodilator-stimulated phosphoprotein                                       | P70460 | NO  | YES | YES | YES | YES | YES | P/MQ |
| NACAM Nascent polypeptide-associated complex subunit alpha, muscle-specific form | P70670 | NO  | YES | NO  | YES | NO  | NO  | P/MQ |
| CASP3 Caspase-3                                                                  | P70677 | NO  | YES | NO  | NO  | NO  | NO  | P    |
| UD12 UDP-glucuronosyltransferase 1-2                                             | P70691 | NO  | YES | NO  | NO  | NO  | NO  | P    |
| GAA Lysosomal alpha-glucosidase                                                  | P70699 | YES | YES | NO  | YES | NO  | YES | P    |
| TCPH T-complex protein 1 subunit eta                                             | P80313 | YES | YES | YES | YES | YES | YES | P/MQ |
| TCPB T-complex protein 1 subunit beta                                            | P80314 | YES | YES | YES | YES | YES | YES | P/MQ |
| TCPD T-complex protein 1 subunit delta                                           | P80315 | YES | YES | YES | YES | YES | YES | P/MQ |
| TCPE T-complex protein 1 subunit epsilon                                         | P80316 | YES | YES | YES | YES | YES | YES | P/MQ |
| TCPG T-complex protein 1 subunit gamma                                           | P80317 | YES | YES | NO  | NO  | NO  | NO  | P/MQ |

|                                                            |        |     |     |     |     |     |     |      |
|------------------------------------------------------------|--------|-----|-----|-----|-----|-----|-----|------|
| TCPG T-complex protein 1 subunit gamma                     | P80318 | YES | NO  | YES | YES | YES | YES | P/MQ |
| NUCB2 Nucleobindin-2                                       | P81117 | NO  | NO  | NO  | YES | NO  | YES | P/MQ |
| BGH3 Transforming growth factor-beta-induced protein ig-h3 | P82198 | NO  | NO  | YES | YES | YES | YES | P/MQ |
| RENBP N-acylglucosamine 2-epimerase                        | P82343 | NO  | YES | NO  | NO  | NO  | NO  | P    |
| WNK1 Serine/threonine-protein kinase WNK1                  | P83741 | NO  | NO  | NO  | YES | NO  | YES | P/MQ |
| RL36A 60S ribosomal protein L36a                           | P83882 | YES | NO  | NO  | NO  | YES | YES | P    |
| CBX1 Chromobox protein homolog 1                           | P83917 | NO  | NO  | NO  | YES | NO  | YES | P    |
| ELOC Elongin-C                                             | P83940 | NO  | NO  | NO  | YES | NO  | NO  | P/MQ |
| ARF1 ADP-ribosylation factor 1                             | P84078 | YES | NO  | YES | YES | YES | YES | P/MQ |
| ARF5 ADP-ribosylation factor 5                             | P84084 | NO  | YES | NO  | NO  | NO  | NO  | P/MQ |
| Enhancer of rudimentary homolog                            | P84089 | YES | YES | YES | YES | YES | YES | MQ   |
| AP2M1 AP-2 complex subunit mu                              | P84091 | NO  | NO  | NO  | NO  | YES | NO  | P    |
| RHOG Rho-related GTP-binding protein RhoG                  | P84096 | NO  | NO  | YES | YES | YES | YES | P    |
| RL19 60S ribosomal protein L19                             | P84099 | YES | NO  | YES | YES | YES | YES | P/MQ |
| SRSF3 Serine/arginine-rich splicing factor 3               | P84104 | YES | NO  | YES | YES | YES | YES | P/MQ |
| H32 Histone H3.2                                           | P84228 | NO  | NO  | YES | YES | YES | YES | P/MQ |
| IC1 Plasma protease C1 inhibitor                           | P97290 | NO  | NO  | NO  | NO  | YES | NO  | P    |
| MCM2 DNA replication licensing factor MCM2                 | P97310 | NO  | NO  | NO  | YES | NO  | NO  | P    |
| MCM6 DNA replication licensing factor MCM6                 | P97311 | NO  | NO  | NO  | NO  | YES | YES | P    |
| CSRP2 Cysteine and glycine-rich protein 2                  | P97314 | NO  | YES | NO  | NO  | NO  | NO  | P    |
| CSRP1 Cysteine and glycine-rich protein 1                  | P97315 | NO  | NO  | NO  | YES | YES | YES | P/MQ |
| RS3A 40S ribosomal protein S3a                             | P97328 | YES | YES | NO  | NO  | NO  | NO  | P    |
| RS3A 40S ribosomal protein S3a                             | P97351 | YES | NO  | YES | YES | YES | YES | P/MQ |
| SPS2 Selenide, water dikinase 2                            | P97364 | NO  | YES | NO  | NO  | NO  | NO  | P    |
| NCF4 Neutrophil cytosol factor 4                           | P97369 | NO  | NO  | NO  | YES | YES | YES | P    |
| PSME1 Proteasome activator complex subunit 1               | P97371 | YES | NO  | YES | YES | YES | YES | P/MQ |
| PSME2 Proteasome activator complex subunit 2               | P97372 | YES | NO  | YES | YES | YES | YES | P/MQ |

|                                                                  |        |     |     |     |     |     |     |      |
|------------------------------------------------------------------|--------|-----|-----|-----|-----|-----|-----|------|
| G3BP2 Ras GTPase-activating protein-binding protein 2            | P97379 | NO  | NO  | YES | YES | NO  | YES | P    |
| ANX11 Annexin A11                                                | P97384 | YES | NO  | YES | YES | YES | YES | P/MQ |
| ANXA4 Annexin A4                                                 | P97429 | YES | NO  | YES | YES | YES | YES | P/MQ |
| MPRIP Myosin phosphatase Rho-interacting protein                 | P97434 | NO  | NO  | NO  | YES | YES | YES | P    |
| AMPN Aminopeptidase N                                            | P97449 | YES | NO  | YES | YES | YES | YES | P/MQ |
| ATP5J ATP synthase-coupling factor 6, mitochondrial              | P97450 | YES | NO  | YES | YES | YES | YES | P/MQ |
| RS5 40S ribosomal protein S5                                     | P97461 | YES | NO  | YES | YES | YES | YES | P/MQ |
| GSH1 Glutamate--cysteine ligase catalytic subunit                | P97494 | YES | NO  | YES | NO  | NO  | NO  | P    |
| PPIP1 Proline-serine-threonine phosphatase-interacting protein 1 | P97814 | NO  | NO  | NO  | YES | NO  | YES | P    |
| S100G Protein S100-G                                             | P97816 | YES | NO  | NO  | NO  | YES | NO  | P/MQ |
| CATC Dipeptidyl peptidase 1                                      | P97821 | NO  | YES | NO  | NO  | NO  | NO  | P/MQ |
| LYPA1 Acyl-protein thioesterase 1                                | P97823 | NO  | YES | NO  | NO  | NO  | NO  | P    |
| JUPI1 Jupiter microtubule associated homolog 1                   | P97825 | NO  | NO  | NO  | NO  | YES | NO  | P    |
| G3BP1 Ras GTPase-activating protein-binding protein 1            | P97855 | NO  | NO  | YES | YES | YES | YES | P/MQ |
| CASP7 Caspase-7                                                  | P97864 | NO  | NO  | NO  | YES | NO  | NO  | P    |
| BRCA2 Breast cancer type 2 susceptibility protein homolog        | P97929 | NO  | YES | NO  | NO  | NO  | NO  | P    |
| DAB2 Disabled homolog 2                                          | P98078 | YES | NO  | YES | YES | YES | YES | P/MQ |
| TBB5 Tubulin beta-5 chain                                        | P99024 | YES | NO  | YES | YES | YES | YES | P/MQ |
| PSB4 Proteasome subunit beta type-4                              | P99026 | YES | NO  | YES | YES | YES | YES | P/MQ |
| RLA2 60S acidic ribosomal protein P2                             | P99027 | YES | NO  | YES | YES | YES | YES | P/MQ |
| PRDX5 Peroxiredoxin-5, mitochondrial                             | P99029 | YES | NO  | YES | YES | YES | YES | P/MQ |
| APOA1 Apolipoprotein A-I                                         | Q00623 | YES | NO  | YES | YES | YES | YES | P/MQ |
| A1AT4 Alpha-1-antitrypsin 1-4                                    | Q00897 | NO  | NO  | YES | YES | YES | YES | P/MQ |
| RET1 Retinol-binding protein 1                                   | Q00915 | NO  | NO  | NO  | YES | NO  | NO  | P    |
| HNRL2 Heterogeneous nuclear ribonucleoprotein U-like protein 2   | Q00PI9 | NO  | NO  | NO  | YES | NO  | NO  | P/MQ |

|                                                                           |        |     |     |     |     |     |     |      |
|---------------------------------------------------------------------------|--------|-----|-----|-----|-----|-----|-----|------|
| CO1A2 Collagen alpha-2(I) chain                                           | Q01149 | NO  | NO  | NO  | YES | YES | YES | P    |
| TOP2A DNA topoisomerase 2-alpha                                           | Q01320 | NO  | NO  | NO  | NO  | YES | NO  | P    |
| SC23A Protein transport protein Sec23A                                    | Q01405 | NO  | NO  | NO  | YES | NO  | NO  | P    |
| RSU1 Ras suppressor protein 1                                             | Q01730 | YES | NO  | YES | YES | YES | YES | P    |
| NDKB Nucleoside diphosphate kinase B                                      | Q01768 | YES | NO  | YES | YES | YES | YES | P/MQ |
| TERA Transitional endoplasmic reticulum ATPase                            | Q01853 | YES | NO  | YES | YES | YES | YES | P/MQ |
| UBA1 Ubiquitin-like modifier-activating enzyme 1                          | Q02053 | YES | NO  | YES | YES | YES | YES | P/MQ |
| C1QC Complement C1q subcomponent subunit C                                | Q02105 | NO  | NO  | NO  | YES | NO  | NO  | P    |
| CTNB1 Catenin beta-1                                                      | Q02248 | NO  | NO  | NO  | YES | NO  | NO  | P/MQ |
| CO6A2 Collagen alpha-2(VI) chain                                          | Q02788 | YES | NO  | YES | YES | YES | YES | P    |
| NUCB1 Nucleobindin-1                                                      | Q02819 | YES | NO  | YES | YES | YES | YES | P/MQ |
| ATP synthase subunit alpha, mitochondrial                                 | Q03265 | YES | YES | YES | YES | YES | YES | MQ   |
| IKZF1 DNA-binding protein Ikaros                                          | Q03267 | NO  | NO  | NO  | YES | NO  | NO  | P    |
| KCRB Creatine kinase B-type                                               | Q04447 | NO  | NO  | YES | YES | YES | YES | P/MQ |
| ATNG Sodium/potassium-transporting ATPase subunit gamma                   | Q04646 | YES | YES | NO  | NO  | NO  | NO  | P/MQ |
| DNA topoisomerase 1                                                       | Q04750 | YES | YES | YES | YES | YES | YES | MQ   |
| CO6A1 Collagen alpha-1(VI) chain                                          | Q04857 | YES | NO  | YES | YES | YES | YES | P    |
| RAC2 Ras-related C3 botulinum toxin substrate 2                           | Q05144 | NO  | NO  | YES | YES | YES | YES | P/MQ |
| RCN1 Reticulocalbin-1                                                     | Q05186 | NO  | NO  | YES | YES | YES | YES | P/MQ |
| MARK2 Serine/threonine-protein kinase MARK2                               | Q05512 | NO  | NO  | NO  | NO  | NO  | YES | P/MQ |
| PGBM Basement membrane-specific heparan sulfate proteoglycan core protein | Q05793 | YES | NO  | YES | YES | YES | YES | P/MQ |
| FABP5 Fatty acid-binding protein 5                                        | Q05816 | NO  | NO  | NO  | YES | YES | YES | P    |
| PC Pyruvate carboxylase, mitochondrial                                    | Q05920 | YES | NO  | YES | NO  | YES | NO  | P/MQ |
| IF2P Eukaryotic translation initiation factor 5B                          | Q05D44 | NO  | NO  | YES | YES | YES | YES | P/MQ |
| PTN2 Tyrosine-protein phosphatase non-receptor type 2                     | Q06180 | NO  | YES | NO  | NO  | NO  | NO  | P    |
| ATP5I ATP synthase subunit e, mitochondrial                               | Q06185 | YES | NO  | YES | YES | YES | YES | P/MQ |

|                                                                   |        |     |     |     |     |     |     |      |
|-------------------------------------------------------------------|--------|-----|-----|-----|-----|-----|-----|------|
| CLUS Clusterin                                                    | Q06890 | YES | NO  | YES | YES | YES | YES | P/MQ |
| ANXA7 Annexin A7                                                  | Q07076 | YES | NO  | YES | YES | YES | NO  | P/MQ |
| BAX Apoptosis regulator BAX                                       | Q07813 | NO  | NO  | NO  | YES | YES | YES | P    |
| PEBB Core-binding factor subunit beta                             | Q08024 | NO  | NO  | NO  | YES | NO  | NO  | P    |
| CNN2 Calponin-2                                                   | Q08093 | NO  | NO  | YES | YES | YES | YES | P/MQ |
| SSRP1 FACT complex subunit SSRP1                                  | Q08943 | NO  | NO  | NO  | NO  | YES | NO  | P    |
| NCF1 Neutrophil cytosol factor 1                                  | Q09014 | NO  | NO  | YES | YES | YES | YES | P    |
| B4GN1 Beta-1,4 N-acetylgalactosaminyltransferase 1                | Q09200 | NO  | NO  | NO  | YES | NO  | NO  | P    |
| APRV1 Retroviral-like aspartic protease 1                         | Q09PK2 | NO  | NO  | NO  | NO  | YES | NO  | P    |
| ZCH18 Zinc finger CCCH domain-containing protein 18               | Q0P678 | NO  | YES | NO  | NO  | NO  | NO  | P    |
| RBM15 RNA-binding protein 15                                      | Q0VBL3 | NO  | NO  | NO  | YES | NO  | NO  | P    |
| PP4R2 Serine/threonine-protein phosphatase 4 regulatory subunit 2 | Q0VGB7 | NO  | YES | NO  | NO  | NO  | NO  | P    |
| PSA Puromycin-sensitive aminopeptidase                            | Q11011 | NO  | NO  | NO  | YES | YES | YES | P/MQ |
| PEPD Xaa-Pro dipeptidase                                          | Q11136 | YES | NO  | NO  | YES | YES | YES | P/MQ |
| NSUN2 tRNA (cytosine(34)-C(5))-methyltransferase                  | Q1HFZ0 | NO  | NO  | NO  | YES | YES | NO  | P    |
| ZFHX2 Zinc finger homeobox protein 2                              | Q2MHN3 | NO  | YES | NO  | NO  | NO  | NO  | P    |
| GSK3A Glycogen synthase kinase-3 alpha                            | Q2NL51 | NO  | YES | NO  | NO  | NO  | NO  | P    |
| HSDL2 Hydroxysteroid dehydrogenase-like protein 2                 | Q2TPA8 | NO  | YES | NO  | NO  | NO  | NO  | P    |
| HMHA1 Rho GTPase-activating protein 45                            | Q3TBD2 | NO  | NO  | NO  | YES | NO  | YES | P    |
| FAHD2 Fumarylacetoacetate hydrolase domain-containing protein 2A  | Q3TC72 | NO  | YES | NO  | NO  | NO  | NO  | P    |
| H1BP3 HCLS1-binding protein 3                                     | Q3TC93 | NO  | YES | NO  | NO  | NO  | NO  | P    |
| PPR21 Protein phosphatase 1 regulatory subunit 21                 | Q3TDD9 | NO  | NO  | NO  | YES | NO  | NO  | P/MQ |
| FAS-associated factor 2                                           | Q3TDN2 | YES | YES | YES | YES | YES | YES | MQ   |
| HP1B3 Heterochromatin protein 1-binding protein 3                 | Q3TEA8 | YES | NO  | YES | YES | YES | YES | P/MQ |
| F107B Protein FAM107B                                             | Q3TGF2 | YES | NO  | YES | YES | YES | YES | P/MQ |
| ML12B Myosin regulatory light chain 12B                           | Q3THE2 | YES | NO  | YES | YES | YES | YES | P/MQ |

|                                                                                |        |     |     |     |     |     |     |      |
|--------------------------------------------------------------------------------|--------|-----|-----|-----|-----|-----|-----|------|
| T2FA General transcription factor IIF subunit 1                                | Q3THK3 | NO  | NO  | NO  | YES | YES | YES | P/MQ |
| GUAA GMP synthase [glutamine-hydrolyzing]                                      | Q3THK7 | NO  | NO  | NO  | YES | YES | NO  | P    |
| ZC3HF Zinc finger CCCH domain-containing protein 15                            | Q3TIV5 | NO  | YES | NO  | NO  | NO  | NO  | P    |
| SNUT2 U4/U6.U5 tri-snRNP-associated protein 2                                  | Q3TIX9 | NO  | YES | NO  | NO  | NO  | NO  | P    |
| PDLI7 PDZ and LIM domain protein 7                                             | Q3TJD7 | NO  | NO  | NO  | YES | NO  | NO  | P    |
| SMCA4 Transcription activator BRG1                                             | Q3TKT4 | NO  | NO  | YES | YES | NO  | YES | P    |
| PRC2C Protein PRRC2C                                                           | Q3TLH4 | NO  | NO  | YES | YES | YES | YES | P/MQ |
| ECHD2 Enoyl-CoA hydratase domain-containing protein 2, mitochondrial           | Q3TLP5 | YES | YES | NO  | NO  | NO  | NO  | P/MQ |
| XYLB Xylulose kinase                                                           | Q3TNA1 | YES | YES | NO  | NO  | NO  | NO  | P    |
| UAP1L UDP-N-acetylhexosamine pyrophosphorylase-like protein 1                  | Q3TW96 | YES | NO  | YES | YES | YES | YES | P/MQ |
| SRSF6 Serine/arginine-rich splicing factor 6                                   | Q3TWW8 | NO  | NO  | NO  | YES | YES | YES | P/MQ |
| PSMD1 26S proteasome non-ATPase regulatory subunit 1                           | Q3TXS7 | NO  | NO  | NO  | YES | YES | NO  | P    |
| ESYT2 Extended synaptotagmin-2                                                 | Q3TZZ7 | NO  | NO  | NO  | YES | NO  | NO  | P    |
| FUBP2 Far upstream element-binding protein 2                                   | Q3U0V1 | YES | NO  | YES | YES | YES | YES | P/MQ |
| DDB1 DNA damage-binding protein 1                                              | Q3U1J4 | NO  | NO  | NO  | YES | YES | NO  | P    |
| F16A2 FTS and Hook-interacting protein                                         | Q3U2I3 | NO  | YES | NO  | NO  | NO  | NO  | P    |
| PYRD2 Pyridine nucleotide-disulfide oxidoreductase domain-containing protein 2 | Q3U4I7 | NO  | YES | NO  | NO  | NO  | NO  | P    |
| CMPK2 UMP-CMP kinase 2, mitochondrial                                          | Q3U5Q7 | NO  | NO  | NO  | NO  | YES | NO  | P    |
| ESYT1 Extended synaptotagmin-1                                                 | Q3U7R1 | NO  | NO  | NO  | YES | YES | YES | P    |
| FBX7 F-box only protein 7                                                      | Q3U7U3 | NO  | YES | NO  | NO  | NO  | NO  | P    |
| CD44 antigen                                                                   | Q3U8S1 | NO  | YES | YES | YES | NO  | YES | MQ   |
| LBR Delta(14)-sterol reductase                                                 | Q3U9G9 | NO  | NO  | YES | YES | YES | YES | P/MQ |
| TM109 Transmembrane protein 109                                                | Q3UBX0 | NO  | YES | NO  | NO  | NO  | NO  | P    |
| PUF60 Poly(U)-binding-splicing factor PUF60                                    | Q3UEB3 | NO  | NO  | NO  | NO  | YES | NO  | P    |
| LYPL1 Lysophospholipase-like protein 1                                         | Q3UFF7 | NO  | YES | NO  | NO  | NO  | NO  | P    |

|                                                                   |        |     |     |     |     |     |     |      |
|-------------------------------------------------------------------|--------|-----|-----|-----|-----|-----|-----|------|
| EI3JA Eukaryotic translation initiation factor 3 subunit J-A      | Q3UGC7 | NO  | NO  | YES | YES | YES | YES | P/MQ |
| NEK10 Serine/threonine-protein kinase Nek10                       | Q3UGM2 | NO  | YES | NO  | NO  | NO  | NO  | P    |
| AAK1 AP2-associated protein kinase 1                              | Q3UHH0 | YES | NO  | YES | YES | YES | YES | P/MQ |
| TEN4 Teneurin-4                                                   | Q3UHK6 | NO  | YES | NO  | NO  | NO  | NO  | P    |
| Fibronectin                                                       | Q3UHL6 | YES | YES | YES | YES | YES | YES | MQ   |
| HAP28 28 kDa heat- and acid-stable phosphoprotein                 | Q3UHX2 | YES | NO  | YES | YES | YES | YES | P/MQ |
| RHG17 Rho GTPase-activating protein 17                            | Q3UIA2 | NO  | NO  | NO  | YES | NO  | NO  | P    |
| PKHA7 Pleckstrin homology domain-containing family A member 7     | Q3UIL6 | NO  | YES | NO  | NO  | NO  | NO  | P    |
| NDUB6 NADH dehydrogenase [ubiquinone] 1 beta subcomplex subunit 6 | Q3UIU2 | YES | NO  | NO  | NO  | NO  | NO  | P    |
| Splicing factor 3b, subunit 2                                     | Q3UJB0 | YES | YES | YES | YES | YES | YES | MQ   |
| EDC4 Enhancer of mRNA-decapping protein 4                         | Q3UJB9 | NO  | NO  | NO  | YES | YES | NO  | P    |
| RMD3 Regulator of microtubule dynamics protein 3                  | Q3UJU9 | NO  | YES | NO  | NO  | NO  | NO  | P    |
| MCCB Methylcrotonoyl-CoA carboxylase beta chain, mitochondrial    | Q3ULD5 | YES | NO  | YES | NO  | YES | NO  | P    |
| PP1R7 Protein phosphatase 1 regulatory subunit 7                  | Q3UM45 | NO  | NO  | NO  | NO  | YES | NO  | P    |
| COBL1 Cordon-bleu protein-like 1                                  | Q3UMF0 | YES | NO  | NO  | NO  | YES | NO  | P    |
| PP12C Protein phosphatase 1 regulatory subunit 12C                | Q3UMT1 | NO  | NO  | NO  | YES | NO  | NO  | P    |
| HDGR2 Hepatoma-derived growth factor-related protein 2            | Q3UMU9 | NO  | NO  | YES | YES | NO  | NO  | P/MQ |
| EMAL4 Echinoderm microtubule-associated protein-like 4            | Q3UMY5 | NO  | NO  | NO  | YES | NO  | NO  | P    |
| SKAP2 Src kinase-associated phosphoprotein 2                      | Q3UND0 | NO  | NO  | NO  | NO  | NO  | YES | P    |
| QORL2 Quinone oxidoreductase-like protein 2                       | Q3UNZ8 | YES | YES | NO  | NO  | NO  | NO  | P    |
| ELANE Neutrophil elastase                                         | Q3UP87 | NO  | NO  | NO  | YES | YES | YES | P    |
| ZCCHV Zinc finger CCCH-type antiviral protein 1                   | Q3UPF5 | NO  | NO  | NO  | NO  | YES | NO  | P    |
| PRRC1 Protein PRRC1                                               | Q3UPH1 | NO  | NO  | NO  | NO  | YES | NO  | P    |
| SC31A Protein transport protein Sec31A                            | Q3UPL0 | YES | NO  | YES | YES | YES | YES | P/MQ |



|                                                                                  |        |     |     |     |     |     |     |      |
|----------------------------------------------------------------------------------|--------|-----|-----|-----|-----|-----|-----|------|
| IQGA2 Ras GTPase-activating-like protein IQGAP2                                  | Q3UQ44 | YES | NO  | NO  | YES | YES | NO  | P/MQ |
| ACSF3 Acyl-CoA synthetase family member 3, mitochondrial                         | Q3URE1 | NO  | YES | NO  | NO  | NO  | NO  | P    |
| SRBS2 Sorbin and SH3 domain-containing protein 2                                 | Q3UTJ2 | YES | NO  | YES | YES | YES | YES | P/MQ |
| NIBAN Protein Niban                                                              | Q3UW53 | NO  | NO  | YES | YES | YES | YES | P/MQ |
| LRRF1 Leucine-rich repeat flightless-interacting protein 1                       | Q3UZ39 | NO  | NO  | YES | YES | YES | YES | P/MQ |
| CPZIP CapZ-interacting protein                                                   | Q3UZA1 | NO  | NO  | NO  | YES | YES | YES | P    |
| ST1D1 Sulfotransferase 1 family member D1                                        | Q3UZZ6 | YES | NO  | NO  | NO  | YES | NO  | P/MQ |
| PLSI Plastin-1                                                                   | Q3V0K9 | YES | YES | NO  | NO  | NO  | NO  | P    |
| C1TM Monofunctional C1-tetrahydrofolate synthase, mitochondrial                  | Q3V3R1 | NO  | NO  | NO  | YES | NO  | NO  | P    |
| SC5AC Sodium-coupled monocarboxylate transporter 2                               | Q49B93 | NO  | YES | NO  | NO  | NO  | NO  | P    |
| OXR1 Oxidation resistance protein 1                                              | Q4KMM3 | NO  | YES | NO  | NO  | NO  | NO  | P    |
| ARAP1 Arf-GAP with Rho-GAP domain, ANK repeat and PH domain-containing protein 1 | Q4LDD4 | NO  | NO  | NO  | YES | NO  | NO  | P    |
| CC88B Coiled-coil domain-containing protein 88B                                  | Q4QRL3 | NO  | NO  | NO  | YES | NO  | YES | P    |
| CDV3 Protein CDV3                                                                | Q4VAA2 | NO  | NO  | NO  | YES | NO  | YES | P    |
| DDX17 Probable ATP-dependent RNA helicase DDX17                                  | Q501J6 | YES | NO  | YES | YES | YES | YES | P/MQ |
| PHAR4 Phosphatase and actin regulator 4                                          | Q501J7 | YES | NO  | NO  | YES | YES | NO  | P    |
| LRC47 Leucine-rich repeat-containing protein 47                                  | Q505F5 | NO  | NO  | YES | YES | YES | YES | P/MQ |
| SRRM1 Serine/arginine repetitive matrix protein 1                                | Q52KI8 | NO  | NO  | NO  | YES | NO  | NO  | P    |
| DDX46 Probable ATP-dependent RNA helicase DDX46                                  | Q569Z5 | NO  | NO  | NO  | YES | YES | YES | P    |
| TR150 Thyroid hormone receptor-associated protein 3                              | Q569Z6 | YES | NO  | YES | YES | YES | YES | P/MQ |
| JIP4 C-Jun-amino-terminal kinase-interacting protein 4                           | Q58A65 | NO  | NO  | NO  | YES | YES | NO  | P    |
| NDUF2 NADH dehydrogenase [ubiquinone] 1 alpha subcomplex assembly factor 2       | Q59J78 | NO  | YES | NO  | NO  | NO  | NO  | P    |
| BRE1A E3 ubiquitin-protein ligase BRE1A                                          | Q5DTM8 | NO  | NO  | NO  | NO  | YES | NO  | P    |

|                                                                  |        |     |     |     |     |     |     |      |
|------------------------------------------------------------------|--------|-----|-----|-----|-----|-----|-----|------|
| AAPK1 5'-AMP-activated protein kinase catalytic subunit alpha-1  | Q5EG47 | NO  | NO  | NO  | YES | NO  | YES | P    |
| NUFP2 Nuclear fragile X mental retardation-interacting protein 2 | Q5F2E7 | NO  | NO  | NO  | YES | NO  | YES | P    |
| RHG01 Rho GTPase-activating protein 1                            | Q5FWK3 | YES | NO  | YES | YES | YES | YES | P/MQ |
| LRC52 Leucine-rich repeat-containing protein 52                  | Q5M8M9 | NO  | YES | NO  | NO  | NO  | NO  | P    |
| DIRA2 GTP-binding protein Di-Ras2                                | Q5PR73 | NO  | YES | NO  | NO  | NO  | NO  | P    |
| HAVR1 Hepatitis A virus cellular receptor 1 homolog              | Q5QNS5 | NO  | NO  | NO  | NO  | YES | NO  | P/MQ |
| IF2B2 Insulin-like growth factor 2 mRNA-binding protein 2        | Q5SF07 | NO  | YES | NO  | NO  | NO  | NO  | P    |
| CYFP2 Cytoplasmic FMR1-interacting protein 2                     | Q5SQX6 | NO  | NO  | NO  | YES | NO  | NO  | P    |
| TM1L2 TOM1-like protein 2                                        | Q5SRX1 | NO  | YES | NO  | NO  | NO  | NO  | P    |
| ABR Active breakpoint cluster region-related protein             | Q5SSL4 | NO  | NO  | NO  | YES | NO  | NO  | P    |
| MYO1G Unconventional myosin-Ig                                   | Q5SUA5 | NO  | NO  | NO  | YES | NO  | YES | P    |
| LC7L3 Luc7-like protein 3                                        | Q5SUF2 | NO  | YES | NO  | NO  | NO  | NO  | P    |
| PUR4 Phosphoribosylformylglycinamide synthase                    | Q5SUR0 | NO  | NO  | NO  | YES | YES | NO  | P/MQ |
| CLU Clustered mitochondria protein homolog                       | Q5SW19 | YES | NO  | NO  | NO  | YES | NO  | P    |
| CYTSB Cytospin-B                                                 | Q5SXY1 | NO  | NO  | NO  | YES | NO  | NO  | P    |
| RABL6 Rab-like protein 6                                         | Q5U3K5 | NO  | NO  | NO  | NO  | YES | NO  | P/MQ |
| GASP1 G-protein coupled receptor-associated sorting protein 1    | Q5U4C1 | NO  | YES | NO  | NO  | NO  | NO  | P    |
| HYKK Hydroxylysine kinase                                        | Q5U5V2 | NO  | YES | NO  | NO  | NO  | NO  | P    |
| ACBD5 Acyl-CoA-binding domain-containing protein 5               | Q5XG73 | NO  | YES | NO  | NO  | NO  | NO  | P    |
| PARL Presenilins-associated rhomboid-like protein, mitochondrial | Q5XJY4 | NO  | YES | NO  | NO  | NO  | NO  | P    |
| COPD Coatamer subunit delta                                      | Q5XJY5 | NO  | NO  | YES | YES | YES | NO  | P/MQ |
| A1CF APOBEC1 complementation factor                              | Q5YD48 | NO  | YES | NO  | NO  | NO  | NO  | P    |
| A1AG1 Alpha-1-acid glycoprotein 1                                | Q60590 | YES | NO  | YES | YES | YES | YES | P/MQ |
| SRC8 Src substrate cortactin                                     | Q60598 | YES | NO  | YES | YES | YES | YES | P/MQ |
| ADSV Adseverin                                                   | Q60604 | NO  | NO  | YES | YES | YES | YES | P    |

|                                                                                   |        |     |     |     |     |     |     |      |
|-----------------------------------------------------------------------------------|--------|-----|-----|-----|-----|-----|-----|------|
| MYL6 Myosin light polypeptide 6                                                   | Q60605 | YES | NO  | YES | YES | YES | YES | P/MQ |
| GRB2 Growth factor receptor-bound protein 2                                       | Q60631 | NO  | NO  | NO  | YES | YES | YES | P    |
| FLOT2 Flotillin-2                                                                 | Q60634 | NO  | NO  | YES | YES | YES | YES | P/MQ |
| SAP3 Ganglioside GM2 activator                                                    | Q60648 | NO  | NO  | NO  | YES | NO  | NO  | P/MQ |
| HNRPD Heterogeneous nuclear ribonucleoprotein D0                                  | Q60668 | YES | NO  | YES | YES | YES | YES | P/MQ |
| PSB6 Proteasome subunit beta type-6                                               | Q60692 | NO  | NO  | NO  | YES | NO  | NO  | P    |
| SAMH1 Deoxynucleoside triphosphate triphosphohydrolase SAMHD1                     | Q60710 | NO  | NO  | YES | YES | YES | YES | P/MQ |
| P4HA1 Prolyl 4-hydroxylase subunit alpha-1                                        | Q60715 | NO  | NO  | NO  | YES | YES | NO  | P    |
| KHDR1 KH domain-containing, RNA-binding, signal transduction-associated protein 1 | Q60749 | NO  | NO  | YES | YES | NO  | YES | P    |
| GCDH Glutaryl-CoA dehydrogenase, mitochondrial                                    | Q60759 | NO  | YES | NO  | NO  | NO  | NO  | P    |
| IRGM1 Immunity-related GTPase family M protein 1                                  | Q60766 | NO  | NO  | YES | YES | YES | NO  | P/MQ |
| NACA Nascent polypeptide-associated complex subunit alpha                         | Q60817 | YES | NO  | YES | NO  | YES | YES | P/MQ |
| NPT2A Sodium-dependent phosphate transport protein 2A                             | Q60825 | NO  | YES | NO  | NO  | NO  | NO  | P    |
| COCA1 Collagen alpha-1(XII) chain                                                 | Q60847 | NO  | NO  | NO  | YES | NO  | YES | P    |
| STIP1 Stress-induced-phosphoprotein 1                                             | Q60864 | YES | NO  | YES | YES | YES | YES | P/MQ |
| CAPR1 Caprin-1                                                                    | Q60865 | YES | NO  | YES | YES | YES | YES | P/MQ |
| PTER Phosphotriesterase-related protein                                           | Q60866 | YES | NO  | YES | NO  | NO  | NO  | P/MQ |
| ARHG2 Rho guanine nucleotide exchange factor 2                                    | Q60875 | NO  | NO  | NO  | YES | NO  | NO  | P    |
| EP15R Epidermal growth factor receptor substrate 15-like 1                        | Q60902 | YES | NO  | YES | YES | YES | YES | P/MQ |
| VDAC2 Voltage-dependent anion-selective channel protein 2                         | Q60930 | YES | NO  | YES | YES | YES | YES | P/MQ |
| VDAC1 Voltage-dependent anion-selective channel protein 1                         | Q60932 | YES | NO  | YES | YES | YES | YES | P/MQ |
| COQ8A Atypical kinase COQ8A, mitochondrial                                        | Q60936 | NO  | YES | NO  | NO  | NO  | NO  | P    |
| PAFA Platelet-activating factor acetylhydrolase                                   | Q60963 | NO  | NO  | NO  | NO  | YES | NO  | P    |

|                                                                                        |        |     |     |     |     |     |     |      |
|----------------------------------------------------------------------------------------|--------|-----|-----|-----|-----|-----|-----|------|
| PAPS1 Bifunctional 3'-phosphoadenosine 5'-phosphosulfate synthase 1                    | Q60967 | NO  | YES | NO  | NO  | NO  | NO  | P    |
| Histone-binding protein RBBP4                                                          | Q60972 | YES | YES | YES | YES | YES | YES | MQ   |
| NCOR1 Nuclear receptor corepressor 1                                                   | Q60974 | NO  | YES | NO  | NO  | NO  | NO  | P    |
| LAMA5 Laminin subunit alpha-5                                                          | Q61001 | NO  | NO  | YES | YES | NO  | YES | P/MQ |
| CD6 T-cell differentiation antigen CD6                                                 | Q61003 | NO  | YES | NO  | NO  | NO  | NO  | P    |
| LAP2B Lamina-associated polypeptide 2, isoforms beta/delta/epsilon/gamma               | Q61029 | YES | NO  | NO  | YES | YES | YES | P/MQ |
| LAP2A Lamina-associated polypeptide 2, isoforms alpha/zeta                             | Q61033 | NO  | NO  | NO  | YES | YES | YES | P    |
| SYHC Histidine--tRNA ligase, cytoplasmic                                               | Q61035 | YES | NO  | NO  | YES | YES | YES | P/MQ |
| PPM1G Protein phosphatase 1G                                                           | Q61074 | NO  | NO  | NO  | YES | YES | YES | P/MQ |
| CDC37 Hsp90 co-chaperone Cdc37                                                         | Q61081 | NO  | NO  | YES | YES | YES | YES | P/MQ |
| CY24B Cytochrome b-245 heavy chain                                                     | Q61093 | NO  | NO  | NO  | YES | NO  | YES | P    |
| REQU Zinc finger protein ubi-d4                                                        | Q61103 | NO  | NO  | NO  | NO  | YES | NO  | P    |
| CFAI Complement factor I                                                               | Q61129 | NO  | YES | NO  | NO  | NO  | NO  | P/MQ |
| CERU Ceruloplasmin                                                                     | Q61147 | YES | NO  | YES | YES | YES | YES | P    |
| 2A5E Serine/threonine-protein phosphatase 2A 56 kDa regulatory subunit epsilon isoform | Q61151 | NO  | NO  | NO  | YES | NO  | NO  | P    |
| PTN18 Tyrosine-protein phosphatase non-receptor type 18                                | Q61152 | NO  | NO  | NO  | YES | NO  | NO  | P    |
| SL9A1 Sodium/hydrogen exchanger 1                                                      | Q61165 | YES | YES | NO  | NO  | NO  | NO  | P    |
| MARE1 Microtubule-associated protein RP/EB family member 1                             | Q61166 | YES | NO  | YES | YES | YES | YES | P/MQ |
| PRDX2 Peroxiredoxin-2                                                                  | Q61171 | YES | NO  | YES | YES | YES | YES | P/MQ |
| ARG1 Arginase-1                                                                        | Q61176 | NO  | NO  | YES | YES | YES | YES | P/MQ |
| PAPOA Poly(A) polymerase alpha                                                         | Q61183 | NO  | YES | NO  | NO  | NO  | NO  | P    |
| TS101 Tumor susceptibility gene 101 protein                                            | Q61187 | NO  | NO  | NO  | YES | NO  | NO  | P    |
| ICLN Methylosome subunit pICln                                                         | Q61189 | NO  | NO  | NO  | NO  | YES | NO  | P    |
| HCFC1 Host cell factor 1                                                               | Q61191 | NO  | NO  | YES | YES | YES | YES | P/MQ |

|                                                                  |        |     |     |     |     |     |     |      |
|------------------------------------------------------------------|--------|-----|-----|-----|-----|-----|-----|------|
| PA1B2 Platelet-activating factor acetylhydrolase IB subunit beta | Q61206 | YES | NO  | YES | NO  | NO  | NO  | P/MQ |
| SAP Prosaposin                                                   | Q61207 | NO  | YES | NO  | NO  | NO  | NO  | P    |
| ARHG1 Rho guanine nucleotide exchange factor 1                   | Q61210 | NO  | NO  | NO  | YES | YES | YES | P    |
| PLSL Plastin-2                                                   | Q61233 | NO  | NO  | YES | YES | YES | YES | P/MQ |
| SNTB2 Beta-2-syntrophin                                          | Q61235 | NO  | YES | NO  | NO  | NO  | NO  | P    |
| A2AP Alpha-2-antiplasmin                                         | Q61247 | YES | NO  | YES | YES | YES | YES | P/MQ |
| IGBP1 Immunoglobulin-binding protein 1                           | Q61249 | NO  | NO  | YES | YES | YES | YES | P/MQ |
| LAMB2 Laminin subunit beta-2                                     | Q61292 | YES | NO  | NO  | NO  | YES | NO  | P    |
| HSP74 Heat shock 70 kDa protein 4                                | Q61316 | YES | NO  | YES | YES | YES | YES | P/MQ |
| BAP31 B-cell receptor-associated protein 31                      | Q61335 | NO  | NO  | YES | NO  | YES | YES | P    |
| CH3L1 Chitinase-3-like protein 1                                 | Q61362 | NO  | NO  | NO  | YES | NO  | NO  | P    |
| CY24A Cytochrome b-245 light chain                               | Q61462 | NO  | NO  | NO  | YES | YES | YES | P    |
| ECM1 Extracellular matrix protein 1                              | Q61508 | NO  | NO  | YES | YES | YES | NO  | P/MQ |
| TRI25 E3 ubiquitin/ISG15 ligase TRIM25                           | Q61510 | NO  | YES | NO  | NO  | NO  | NO  | P    |
| EWS RNA-binding protein EWS                                      | Q61545 | YES | NO  | YES | YES | YES | YES | P/MQ |
| RAD21 Double-strand-break repair protein rad21 homolog           | Q61550 | NO  | NO  | NO  | NO  | YES | NO  | P    |
| FSCN1 Fascin                                                     | Q61553 | NO  | YES | NO  | NO  | NO  | NO  | P    |
| FBN1 Fibrillin-1                                                 | Q61554 | NO  | NO  | NO  | YES | NO  | NO  | P    |
| IBP7 Insulin-like growth factor-binding protein 7                | Q61581 | NO  | YES | NO  | NO  | NO  | NO  | P    |
| FXR1 Fragile X mental retardation syndrome-related protein 1     | Q61584 | NO  | NO  | NO  | YES | NO  | NO  | P    |
| KTN1 Kinectin                                                    | Q61595 | NO  | NO  | NO  | NO  | NO  | YES | P    |
| GDIB Rab GDP dissociation inhibitor beta                         | Q61598 | NO  | NO  | YES | YES | YES | YES | P/MQ |
| GDIR2 Rho GDP-dissociation inhibitor 2                           | Q61599 | NO  | NO  | YES | YES | YES | YES | P/MQ |
| GTP-binding protein                                              | Q61635 | NO  | YES | YES | YES | NO  | YES | MQ   |
| HP Haptoglobin                                                   | Q61646 | YES | NO  | YES | YES | YES | YES | P/MQ |
| DD19A ATP-dependent RNA helicase DDX19A                          | Q61655 | NO  | NO  | NO  | YES | YES | YES | P/MQ |

|                                                          |        |     |     |     |     |     |     |      |
|----------------------------------------------------------|--------|-----|-----|-----|-----|-----|-----|------|
| DDX5 Probable ATP-dependent RNA helicase DDX5            | Q61656 | YES | NO  | YES | YES | YES | YES | P/MQ |
| ATRX Transcriptional regulator ATRX                      | Q61687 | NO  | YES | NO  | NO  | NO  | NO  | P    |
| HS71A Heat shock 70 kDa protein 1A                       | Q61696 | NO  | NO  | NO  | YES | YES | YES | P/MQ |
| HS105 Heat shock protein 105 kDa                         | Q61699 | YES | NO  | YES | YES | YES | YES | P/MQ |
| ITIH2 Inter-alpha-trypsin inhibitor heavy chain H2       | Q61703 | NO  | YES | NO  | NO  | NO  | NO  | P    |
| ITIH3 Inter-alpha-trypsin inhibitor heavy chain H3       | Q61704 | YES | NO  | YES | YES | YES | YES | P/MQ |
| ITA6 Integrin alpha-6                                    | Q61739 | YES | NO  | NO  | NO  | YES | NO  | P/MQ |
| EI2BD Translation initiation factor eIF-2B subunit delta | Q61749 | NO  | YES | NO  | NO  | NO  | NO  | P    |
| SERA D-3-phosphoglycerate dehydrogenase                  | Q61753 | NO  | NO  | YES | YES | YES | YES | P/MQ |
| 3BHS4 NADPH-dependent 3-keto-steroid reductase Hsd3b4    | Q61767 | YES | YES | NO  | NO  | NO  | NO  | P    |
| KINH Kinesin-1 heavy chain                               | Q61768 | YES | NO  | YES | YES | YES | YES | P/MQ |
| LASP1 LIM and SH3 domain protein 1                       | Q61792 | YES | NO  | YES | YES | YES | YES | P/MQ |
| PZP Pregnancy zone protein                               | Q61838 | YES | NO  | YES | YES | YES | YES | P/MQ |
| MEP1B Meprin A subunit beta                              | Q61847 | NO  | YES | NO  | NO  | NO  | NO  | P    |
| MYH10 Myosin-10                                          | Q61879 | YES | NO  | YES | YES | YES | YES | P/MQ |
| MCM7 DNA replication licensing factor MCM7               | Q61881 | NO  | NO  | NO  | YES | NO  | NO  | P    |
| NPM Nucleophosmin                                        | Q61937 | YES | NO  | YES | YES | YES | YES | P/MQ |
| PCBP2 Poly(rC)-binding protein 2                         | Q61990 | NO  | YES | NO  | NO  | NO  | NO  | P    |
| POSTN Periostin                                          | Q62009 | NO  | NO  | NO  | YES | NO  | NO  | P    |
| PEA15 Astrocytic phosphoprotein PEA-15                   | Q62048 | NO  | YES | NO  | NO  | NO  | NO  | P    |
| SRSF2 Serine/arginine-rich splicing factor 2             | Q62093 | NO  | NO  | YES | YES | YES | YES | P/MQ |
| AL1A2 Retinal dehydrogenase 2                            | Q62148 | NO  | NO  | YES | YES | YES | NO  | P/MQ |
| DDX3X ATP-dependent RNA helicase DDX3X                   | Q62167 | YES | NO  | YES | YES | YES | YES | P/MQ |
| SSRD Translocon-associated protein subunit delta         | Q62186 | NO  | NO  | NO  | YES | YES | NO  | P    |
| DPYL3 Dihydropyrimidinase-related protein 3              | Q62188 | YES | NO  | YES | YES | YES | YES | P    |
| SNRPA U1 small nuclear ribonucleoprotein A               | Q62189 | NO  | NO  | NO  | YES | NO  | NO  | P    |
| SPTB2 Spectrin beta chain, non-erythrocytic 1            | Q62261 | YES | NO  | YES | YES | YES | YES | P/MQ |

|                                                                         |        |     |     |     |     |     |     |      |
|-------------------------------------------------------------------------|--------|-----|-----|-----|-----|-----|-----|------|
| TGTP1 T-cell-specific guanine nucleotide triphosphate-binding protein 1 | Q62293 | NO  | NO  | YES | YES | YES | YES | P    |
| TIF1B Transcription intermediary factor 1-beta                          | Q62318 | NO  | NO  | NO  | YES | YES | YES | P/MQ |
| RU17 U1 small nuclear ribonucleoprotein 70 kDa                          | Q62376 | YES | NO  | YES | YES | YES | YES | P/MQ |
| TPD52 Tumor protein D52                                                 | Q62393 | YES | NO  | YES | YES | YES | YES | P/MQ |
| SRBS1 Sorbin and SH3 domain-containing protein 1                        | Q62417 | YES | NO  | YES | YES | YES | YES | P    |
| Drebrin-like protein                                                    | Q62418 | YES | YES | YES | YES | YES | YES | MQ   |
| SH3G1 Endophilin-A2                                                     | Q62419 | NO  | NO  | NO  | YES | NO  | NO  | P    |
| OSTF1 Osteoclast-stimulating factor 1                                   | Q62422 | NO  | NO  | YES | YES | YES | YES | P    |
| NDUA4 Cytochrome c oxidase subunit NDUF4A                               | Q62425 | YES | YES | NO  | NO  | NO  | NO  | P    |
| CYTB Cystatin-B                                                         | Q62426 | YES | NO  | YES | YES | YES | YES | P/MQ |
| SMAD2 Mothers against decapentaplegic homolog 2                         | Q62432 | NO  | NO  | NO  | YES | NO  | YES | P/MQ |
| NDRG1 Protein NDRG1                                                     | Q62433 | YES | NO  | YES | YES | YES | YES | P/MQ |
| FKBP3 Peptidyl-prolyl cis-trans isomerase FKBP3                         | Q62446 | YES | NO  | YES | YES | YES | YES | P/MQ |
| IF4G2 Eukaryotic translation initiation factor 4 gamma 2                | Q62448 | YES | NO  | NO  | YES | YES | YES | P/MQ |
| VAT1 Synaptic vesicle membrane protein VAT-1 homolog                    | Q62465 | YES | NO  | YES | YES | YES | YES | P/MQ |
| VILI Villin-1                                                           | Q62468 | YES | NO  | YES | YES | YES | YES | P/MQ |
| ITA3 Integrin alpha-3                                                   | Q62470 | NO  | YES | NO  | NO  | NO  | NO  | P    |
| ZYX Zyxin                                                               | Q62523 | NO  | NO  | YES | YES | YES | YES | P/MQ |
| SBP2 Selenium-binding protein 2                                         | Q63836 | NO  | NO  | NO  | YES | NO  | NO  | P    |
| MK03 Mitogen-activated protein kinase 3                                 | Q63844 | NO  | NO  | NO  | YES | YES | YES | P    |
| CAVN2 Caveolae-associated protein 2                                     | Q63918 | NO  | YES | NO  | NO  | NO  | NO  | P    |
| MP2K2 Dual specificity mitogen-activated protein kinase kinase 2        | Q63932 | NO  | NO  | NO  | YES | YES | NO  | P    |
| INADL InaD-like protein                                                 | Q63ZW7 | NO  | YES | NO  | NO  | NO  | NO  | P    |
| CRK Adapter molecule crk                                                | Q64010 | YES | NO  | NO  | YES | YES | YES | P    |
| RALY RNA-binding protein Raly                                           | Q64012 | YES | NO  | NO  | YES | YES | YES | P/MQ |

|                                                           |        |     |     |     |     |     |     |      |
|-----------------------------------------------------------|--------|-----|-----|-----|-----|-----|-----|------|
| AEBP1 Adipocyte enhancer-binding protein 1                | Q640N1 | NO  | NO  | NO  | YES | YES | NO  | P/MQ |
| SPRE Sepiapterin reductase                                | Q64105 | YES | NO  | YES | YES | YES | YES | P/MQ |
| SF01 Splicing factor 1                                    | Q64213 | YES | NO  | NO  | YES | YES | YES | P/MQ |
| STXB2 Syntaxin-binding protein 2                          | Q64324 | NO  | NO  | NO  | YES | YES | YES | P/MQ |
| MYO6 Unconventional myosin-VI                             | Q64331 | YES | YES | NO  | NO  | NO  | NO  | P    |
| FKBP5 Peptidyl-prolyl cis-trans isomerase FKBP5           | Q64378 | NO  | NO  | NO  | NO  | YES | NO  | P    |
| CH10 10 kDa heat shock protein, mitochondrial             | Q64433 | YES | NO  | YES | YES | YES | YES | P/MQ |
| ATP4A Potassium-transporting ATPase alpha chain 1         | Q64436 | NO  | YES | NO  | NO  | NO  | NO  | P    |
| SORDp Sorbitol dehydrogenase                              | Q64442 | YES | NO  | YES | YES | YES | NO  | P/MQ |
| CP4B1 Cytochrome P450 4B1                                 | Q64462 | NO  | YES | NO  | NO  | NO  | NO  | P    |
| Histone H2B type 1-B                                      | Q64475 | YES | YES | YES | YES | YES | YES | MQ   |
| TPP2 Tripeptidyl-peptidase 2                              | Q64514 | NO  | NO  | NO  | YES | YES | NO  | P/MQ |
| AT2A3 Sarcoplasmic/endoplasmic reticulum calcium ATPase 3 | Q64518 | NO  | NO  | NO  | YES | NO  | NO  | P    |
| H2A2C Histone H2A type 2-C                                | Q64523 | YES | NO  | NO  | YES | YES | YES | P/MQ |
| H2B2B Histone H2B type 2-B                                | Q64525 | NO  | YES | NO  | NO  | NO  | NO  | P    |
| NQO1 NAD(P)H dehydrogenase [quinone] 1                    | Q64669 | NO  | YES | NO  | NO  | NO  | NO  | P    |
| SRM Spermidine synthase                                   | Q64674 | NO  | NO  | NO  | YES | YES | NO  | P/MQ |
| VINC Vinculin                                             | Q64727 | YES | NO  | YES | YES | YES | YES | P/MQ |
| RAB3I Rab-3A-interacting protein                          | Q68EF0 | NO  | YES | NO  | NO  | NO  | NO  | P    |
| CLH1 Clathrin heavy chain 1                               | Q68FD5 | YES | NO  | YES | YES | YES | YES | P/MQ |
| PKP4 Plakophilin-4                                        | Q68FH0 | YES | YES | NO  | NO  | NO  | NO  | P    |
| SAHH3 Putative adenosylhomocysteinase 3                   | Q68FL4 | YES | NO  | YES | YES | YES | YES | P/MQ |
| SYMC Methionine--tRNA ligase, cytoplasmic                 | Q68FL6 | NO  | NO  | NO  | YES | NO  | YES | P    |
| MYOF Myoferlin                                            | Q69ZN7 | NO  | NO  | YES | YES | YES | YES | P    |
| PDS5A Sister chromatid cohesion protein PDS5 homolog A    | Q6A026 | NO  | NO  | YES | YES | YES | YES | P/MQ |
| SWP70 Switch-associated protein 70                        | Q6A028 | NO  | NO  | NO  | YES | NO  | NO  | P    |



|                                                                        |        |     |     |     |     |     |     |      |
|------------------------------------------------------------------------|--------|-----|-----|-----|-----|-----|-----|------|
| CE170 Centrosomal protein of 170 kDa                                   | Q6A065 | NO  | NO  | NO  | YES | NO  | NO  | P    |
| CDC5L Cell division cycle 5-like protein                               | Q6A068 | NO  | NO  | NO  | YES | YES | YES | P    |
| LAR4B La-related protein 4B                                            | Q6A0A2 | NO  | NO  | NO  | YES | YES | NO  | P    |
| F120A Constitutive coactivator of PPAR-gamma-like protein 1            | Q6A0A9 | YES | NO  | YES | YES | YES | YES | P/MQ |
| RFTN1 Raftlin                                                          | Q6A0D4 | NO  | NO  | NO  | YES | NO  | NO  | P    |
| CGNL1 Cingulin-like protein 1                                          | Q6AW69 | YES | NO  | NO  | YES | NO  | NO  | P/MQ |
| PRAM PML-RARA-regulated adapter molecule 1                             | Q6BCL1 | NO  | NO  | NO  | YES | YES | YES | P    |
| NOP58 Nucleolar protein 58                                             | Q6DFW4 | NO  | NO  | NO  | YES | NO  | NO  | P/MQ |
| PFKFB4 6-phosphofructo-2-kinase/fructose-2,6-bisphosphatase 4          | Q6DTY7 | NO  | NO  | NO  | YES | NO  | NO  | P    |
| LEMD2 LEM domain-containing protein 2                                  | Q6DVA0 | NO  | YES | NO  | NO  | NO  | NO  | P    |
| ENPP3 Ectonucleotide pyrophosphatase/phosphodiesterase family member 3 | Q6DYE8 | NO  | YES | NO  | NO  | NO  | NO  | P    |
| A2MG Alpha-2-macroglobulin-P                                           | Q6GQT1 | YES | NO  | YES | NO  | YES | NO  | P    |
| NOMO1 nodal modulator 1                                                | Q6GQT9 | NO  | NO  | YES | YES | YES | YES | P    |
| RGPA1 Ral GTPase-activating protein subunit alpha-1                    | Q6GYP7 | NO  | YES | NO  | NO  | NO  | NO  | P    |
| TPM4 Tropomyosin alpha-4 chain                                         | Q6IRU2 | YES | NO  | YES | YES | YES | YES | P/MQ |
| CLCB Clathrin light chain B                                            | Q6IRU5 | YES | NO  | YES | YES | YES | YES | P/MQ |
| PEPL1 Probable aminopeptidase NPEPL1                                   | Q6NSR8 | NO  | YES | NO  | NO  | NO  | NO  | P    |
| CPSF6 Cleavage and polyadenylation specificity factor subunit 6        | Q6NVF9 | NO  | NO  | NO  | YES | NO  | YES | P/MQ |
| DNJC8 DnaJ homolog subfamily C member 8                                | Q6NZB0 | NO  | NO  | NO  | YES | YES | YES | P/MQ |
| ZC11A Zinc finger CCCH domain-containing protein 11A                   | Q6NZF1 | NO  | NO  | NO  | YES | NO  | NO  | P    |
| IF4G1 Eukaryotic translation initiation factor 4 gamma 1               | Q6NZJ6 | YES | NO  | YES | YES | YES | YES | P/MQ |
| SORCN Sorcin                                                           | Q6P069 | NO  | NO  | YES | YES | YES | YES | P    |
| XPP1 Xaa-Pro aminopeptidase 1                                          | Q6P1B1 | YES | NO  | NO  | NO  | YES | NO  | P    |
| ATG2A Autophagy-related protein 2 homolog A                            | Q6P4T0 | NO  | YES | NO  | NO  | NO  | NO  | P    |

|                                                                                      |        |     |     |     |     |     |     |      |
|--------------------------------------------------------------------------------------|--------|-----|-----|-----|-----|-----|-----|------|
| U520 U5 small nuclear ribonucleoprotein 200 kDa helicase                             | Q6P4T2 | NO  | NO  | NO  | YES | YES | YES | P    |
| ABCF1 ATP-binding cassette sub-family F member 1                                     | Q6P542 | NO  | NO  | NO  | YES | YES | YES | P/MQ |
| UGGG1 UDP-glucose:glycoprotein glucosyltransferase 1                                 | Q6P5E4 | NO  | NO  | NO  | YES | YES | NO  | P    |
| XPO1 Exportin-1                                                                      | Q6P5F9 | NO  | YES | NO  | NO  | NO  | NO  | P/MQ |
| UBXN7 UBX domain-containing protein 7                                                | Q6P5G6 | NO  | NO  | NO  | YES | YES | NO  | P    |
| NEST Nestin                                                                          | Q6P5H2 | YES | NO  | YES | YES | YES | NO  | P/MQ |
| PCNP PEST proteolytic signal-containing nuclear protein                              | Q6P8I4 | YES | NO  | YES | YES | YES | YES | P/MQ |
| SNX6 Sorting nexin-6                                                                 | Q6P8X1 | NO  | NO  | YES | YES | YES | YES | P/MQ |
| FHOD1 FH1/FH2 domain-containing protein 1                                            | Q6P9Q4 | NO  | NO  | NO  | YES | NO  | NO  | P    |
| FKB15 FK506-binding protein 15                                                       | Q6P9Q6 | NO  | NO  | YES | YES | YES | YES | P/MQ |
| OXR1 Serine/threonine-protein kinase OSR1                                            | Q6P9R2 | YES | NO  | YES | YES | NO  | YES | P    |
| TXLNA Alpha-taxilin                                                                  | Q6PAM1 | NO  | YES | NO  | NO  | NO  | NO  | P/MQ |
| LPPRC Leucine-rich PPR motif-containing protein, mitochondrial                       | Q6PB66 | YES | NO  | NO  | YES | NO  | NO  | P    |
| 2A5A Serine/threonine-protein phosphatase 2A 56 kDa regulatory subunit alpha isoform | Q6PD03 | NO  | NO  | NO  | YES | NO  | NO  | P    |
| SMRC2 SWI/SNF complex subunit SMARCC2                                                | Q6PDG5 | NO  | NO  | NO  | YES | YES | YES | P    |
| ECM29 Proteasome adapter and scaffold protein ECM29                                  | Q6PDI5 | NO  | NO  | NO  | YES | YES | NO  | P    |
| DC1L2 Cytoplasmic dynein 1 light intermediate chain 2                                | Q6PDL0 | NO  | NO  | YES | YES | YES | YES | P    |
| SRSF1 Serine/arginine-rich splicing factor 1                                         | Q6PDM2 | YES | NO  | YES | YES | YES | YES | P/MQ |
| MYLK Myosin light chain kinase, smooth muscle                                        | Q6PDN3 | YES | NO  | YES | YES | YES | YES | P/MQ |
| CHD4 Chromodomain-helicase-DNA-binding protein 4                                     | Q6PDQ2 | NO  | NO  | NO  | NO  | YES | NO  | P/MQ |
| AEDO 2-aminoethanethiol dioxygenase                                                  | Q6PDY2 | NO  | NO  | NO  | YES | NO  | NO  | P    |
| PRRT3 Proline-rich transmembrane protein 3                                           | Q6PE13 | NO  | YES | NO  | NO  | NO  | NO  | P    |
| EXOC8 Exocyst complex component 8                                                    | Q6PGF7 | NO  | YES | NO  | NO  | NO  | NO  | P    |
| JUPI2 Jupiter microtubule associated homolog 2                                       | Q6PGH2 | NO  | NO  | YES | YES | YES | NO  | P    |

|                                                                                        |         |     |     |     |     |     |     |      |
|----------------------------------------------------------------------------------------|---------|-----|-----|-----|-----|-----|-----|------|
| WASC2 WASH complex subunit 2                                                           | Q6PGL7  | YES | NO  | NO  | YES | YES | YES | P/MQ |
| RAB35 Ras-related protein Rab-35                                                       | Q6PHN9  | NO  | YES | NO  | NO  | NO  | NO  | P    |
| YJ005 Uncharacterized protein FLJ45252 homolog                                         | Q6PIU9  | NO  | NO  | NO  | YES | NO  | NO  | P/MQ |
| AT2B4 Plasma membrane calcium-transporting ATPase 4                                    | Q6Q477  | NO  | YES | NO  | NO  | NO  | NO  | P/MQ |
| DDX58 Probable ATP-dependent RNA helicase DDX58                                        | Q6Q899  | NO  | NO  | NO  | YES | NO  | NO  | P    |
| NEB2 Neurabin-2                                                                        | Q6R891  | NO  | NO  | NO  | YES | NO  | YES | P    |
| UBR2 E3 ubiquitin-protein ligase UBR2                                                  | Q6WKZ8  | NO  | YES | NO  | NO  | NO  | NO  | P    |
| KCD12 BTB/POZ domain-containing protein KCTD12                                         | Q6WVG3  | NO  | NO  | YES | YES | NO  | YES | P/MQ |
| Calumenin                                                                              | Q6XLQ8  | YES | YES | YES | YES | YES | YES | MQ   |
| GGYF2 GRB10-interacting GYF protein 2                                                  | Q6Y7W8  | NO  | YES | NO  | NO  | NO  | NO  | P    |
| PITM2 Membrane-associated phosphatidylinositol transfer protein 2                      | Q6ZPQ6  | NO  | YES | NO  | NO  | NO  | NO  | P    |
| CAND1 Cullin-associated NEDD8-dissociated protein 1                                    | Q6ZQ38  | YES | NO  | YES | YES | YES | YES | P/MQ |
| MLEC Malectin                                                                          | Q6ZQI3  | NO  | NO  | YES | NO  | NO  | NO  | P/MQ |
| UD17C UDP-glucuronosyltransferase 1-7C                                                 | Q6ZQM8  | NO  | NO  | NO  | NO  | YES | NO  | P/MQ |
| RS9 40S ribosomal protein S9                                                           | Q6ZWN5  | YES | NO  | YES | YES | YES | YES | P/MQ |
| SPCS3 Signal peptidase complex subunit 3                                               | Q6ZWQ7  | NO  | YES | NO  | NO  | NO  | NO  | P    |
| RS27 40S ribosomal protein S27                                                         | Q6ZWU9  | NO  | NO  | YES | YES | NO  | YES | P/MQ |
| RL10 60S ribosomal protein L10                                                         | Q6Z WV3 | NO  | NO  | NO  | YES | YES | YES | P    |
| RL35 60S ribosomal protein L35                                                         | Q6Z WV7 | YES | NO  | YES | YES | YES | YES | P/MQ |
| IF2A Eukaryotic translation initiation factor 2 subunit 1                              | Q6Z WX6 | NO  | NO  | NO  | NO  | YES | YES | P/MQ |
| TYB10 Thymosin beta-10                                                                 | Q6Z WY8 | YES | NO  | YES | YES | YES | YES | P    |
| H2B1C Histone H2B type 1-C/E/G                                                         | Q6Z WY9 | NO  | NO  | YES | YES | YES | YES | P    |
| TLN2 Talin-2                                                                           | Q71 LX4 | NO  | YES | NO  | NO  | NO  | NO  | P    |
| MINY1 Ubiquitin carboxyl-terminal hydrolase MINDY-1                                    | Q76 LS9 | NO  | YES | NO  | NO  | NO  | NO  | P    |
| 2AAA Serine/threonine-protein phosphatase 2A 65 kDa regulatory subunit A alpha isoform | Q76 MZ3 | YES | NO  | NO  | YES | YES | YES | P/MQ |

|                                                                      |        |     |     |     |     |     |     |      |
|----------------------------------------------------------------------|--------|-----|-----|-----|-----|-----|-----|------|
| USMG5 Up-regulated during skeletal muscle growth protein 5           | Q78IK2 | NO  | NO  | NO  | NO  | YES | NO  | P/MQ |
| MIC27 MICOS complex subunit Mic27                                    | Q78IK4 | NO  | YES | NO  | NO  | NO  | NO  | P    |
| 3HAO 3-hydroxyanthranilate 3,4-dioxygenase                           | Q78JT3 | YES | YES | NO  | NO  | NO  | NO  | P    |
| SND1 Staphylococcal nuclease domain-containing protein 1             | Q78PY7 | YES | NO  | YES | YES | YES | YES | P/MQ |
| NP1L4 Nucleosome assembly protein 1-like 4                           | Q78ZA7 | NO  | NO  | YES | YES | YES | YES | P/MQ |
| MTCH2 Mitochondrial carrier homolog 2                                | Q791V5 | NO  | YES | NO  | NO  | NO  | NO  | P    |
| PICAL Phosphatidylinositol-binding clathrin assembly protein         | Q7M6Y3 | YES | NO  | YES | YES | YES | YES | P/MQ |
| Nuclear pore complex-associated intranuclear coiled-coil protein TPR | Q7M739 | YES | YES | YES | YES | YES | YES | MQ   |
| CYFP1 Cytoplasmic FMR1-interacting protein 1                         | Q7TMB8 | NO  | NO  | NO  | YES | YES | YES | P/MQ |
| NDUAC NADH dehydrogenase [ubiquinone] 1 alpha subcomplex subunit 12  | Q7TMF3 | NO  | YES | NO  | NO  | NO  | NO  | P    |
| HNRPQ Heterogeneous nuclear ribonucleoprotein Q                      | Q7TMK9 | YES | NO  | YES | YES | YES | YES | P/MQ |
| TBB2A Tubulin beta-2A chain                                          | Q7TMM9 | YES | NO  | NO  | YES | YES | NO  | P/MQ |
| ABCG2 ATP-binding cassette sub-family G member 2                     | Q7TMS5 | NO  | YES | NO  | NO  | NO  | NO  | P    |
| HUWE1 E3 ubiquitin-protein ligase HUWE1                              | Q7TMY8 | NO  | NO  | NO  | YES | NO  | NO  | P    |
| INAVA Innate immunity activator protein                              | Q7TN12 | NO  | YES | NO  | NO  | NO  | NO  | P    |
| SMAP2 Stromal membrane-associated protein 2                          | Q7TN29 | NO  | NO  | NO  | YES | NO  | NO  | P    |
| LC7L2 Putative RNA-binding protein Luc7-like 2                       | Q7TNC4 | NO  | NO  | NO  | YES | YES | YES | P/MQ |
| DOC2A Double C2-like domain-containing protein alpha                 | Q7TNF0 | NO  | YES | NO  | NO  | NO  | NO  | P    |
| EMAL2 Echinoderm microtubule-associated protein-like 2               | Q7TNG5 | NO  | NO  | NO  | YES | YES | YES | P    |
| LDHD Probable D-lactate dehydrogenase, mitochondrial                 | Q7TNG8 | YES | NO  | YES | NO  | YES | YES | P    |
| DEK Protein DEK                                                      | Q7TNV0 | NO  | NO  | YES | YES | YES | YES | P/MQ |
| ACTN1 Alpha-actinin-1                                                | Q7TPR4 | YES | NO  | YES | YES | YES | YES | P/MQ |
| MBB1A Myb-binding protein 1A                                         | Q7TPV4 | YES | NO  | YES | YES | YES | YES | P/MQ |

|                                                                   |        |     |     |     |     |     |     |      |
|-------------------------------------------------------------------|--------|-----|-----|-----|-----|-----|-----|------|
| PKHA6 Pleckstrin homology domain-containing family A member 6     | Q7TQG1 | NO  | YES | NO  | NO  | NO  | NO  | P    |
| ATX2L Ataxin-2-like protein                                       | Q7TQH0 | NO  | NO  | NO  | YES | NO  | YES | P    |
| OTUB1 Ubiquitin thioesterase OTUB1                                | Q7TQI3 | NO  | YES | NO  | NO  | NO  | NO  | P    |
| PRC2A Protein PRRC2A                                              | Q7TSC1 | NO  | NO  | NO  | YES | YES | YES | P    |
| PP6R1 Serine/threonine-protein phosphatase 6 regulatory subunit 1 | Q7TSI3 | NO  | NO  | NO  | YES | NO  | NO  | P    |
| PGM2 Phosphoglucomutase-2                                         | Q7TSV4 | NO  | NO  | NO  | YES | YES | YES | P/MQ |
| ENKD1 Enkurin domain-containing protein 1                         | Q7TSV9 | NO  | YES | NO  | NO  | NO  | NO  | P    |
| MRCKB Serine/threonine-protein kinase MRCK beta                   | Q7TT50 | NO  | YES | NO  | NO  | NO  | NO  | P    |
| GVIN1 Interferon-induced very large GTPase 1                      | Q80SU7 | NO  | NO  | YES | YES | YES | YES | P    |
| SAHH2 S-adenosylhomocysteine hydrolase-like protein 1             | Q80SW1 | NO  | YES | NO  | NO  | NO  | NO  | P    |
| FNBP1 Formin-binding protein 1                                    | Q80TY0 | NO  | NO  | NO  | YES | NO  | NO  | P    |
| SNPH Syntaphilin                                                  | Q80U23 | NO  | YES | NO  | NO  | NO  | NO  | P    |
| ARHGH Rho guanine nucleotide exchange factor 17                   | Q80U35 | NO  | YES | NO  | NO  | NO  | NO  | P    |
| UBP8 Ubiquitin carboxyl-terminal hydrolase 8                      | Q80U87 | NO  | NO  | NO  | YES | NO  | NO  | P    |
| Band 4.1-like protein 2                                           | Q80UE5 | NO  | YES | NO  | YES | YES | YES | MQ   |
| SEPT9 Septin-9                                                    | Q80UG5 | YES | NO  | YES | YES | YES | YES | P/MQ |
| MOGS Mannosyl-oligosaccharide glucosidase                         | Q80UM7 | NO  | NO  | NO  | YES | NO  | NO  | P    |
| PGRC2 Membrane-associated progesterone receptor component 2       | Q80UU9 | NO  | NO  | NO  | YES | YES | NO  | P    |
| FA98B Protein FAM98B                                              | Q80VD1 | YES | YES | NO  | NO  | NO  | NO  | P    |
| SRA1 Steroid receptor RNA activator 1                             | Q80VJ2 | NO  | NO  | NO  | YES | NO  | NO  | P    |
| DNPH1 2'-deoxynucleoside 5'-phosphate N-hydrolase 1               | Q80VJ3 | NO  | YES | NO  | NO  | NO  | NO  | P    |
| KASH5 Protein KASH5                                               | Q80VJ8 | NO  | YES | NO  | NO  | NO  | NO  | P    |
| AL3B1 Aldehyde dehydrogenase family 3 member B1                   | Q80VQ0 | NO  | NO  | NO  | YES | YES | YES | P    |
| THNS2 Threonine synthase-like 2                                   | Q80W22 | NO  | YES | NO  | NO  | NO  | NO  | P    |
| KIRR1 Kin of IRRE-like protein 1                                  | Q80W68 | NO  | YES | NO  | NO  | NO  | NO  | P    |

|                                                                           |        |     |     |     |     |     |     |      |
|---------------------------------------------------------------------------|--------|-----|-----|-----|-----|-----|-----|------|
| AGFG2 Arf-GAP domain and FG repeat-containing protein 2                   | Q80WC7 | NO  | YES | NO  | NO  | NO  | NO  | P    |
| LYRIC Protein LYRIC                                                       | Q80WJ7 | NO  | NO  | NO  | YES | YES | YES | P/MQ |
| Protein VAC14 homolog                                                     | Q80WQ2 | YES | YES | YES | YES | YES | YES | MQ   |
| COEA1 Collagen alpha-1(XIV) chain                                         | Q80X19 | YES | NO  | NO  | YES | YES | NO  | P    |
| VRK1 Serine/threonine-protein kinase VRK1                                 | Q80X41 | NO  | NO  | NO  | NO  | NO  | YES | P    |
| UBP2L Ubiquitin-associated protein 2-like                                 | Q80X50 | YES | NO  | YES | YES | YES | YES | P/MQ |
| C2C2L Phospholipid transfer protein C2CD2L                                | Q80X80 | NO  | YES | NO  | NO  | NO  | NO  | P    |
| FLNB Filamin-B                                                            | Q80X90 | YES | NO  | YES | YES | YES | YES | P/MQ |
| FBX34 F-box only protein 34                                               | Q80XI1 | NO  | YES | NO  | NO  | NO  | NO  | P    |
| IF4G3 Eukaryotic translation initiation factor 4 gamma 3                  | Q80XI3 | NO  | NO  | NO  | YES | NO  | NO  | P    |
| PI42B Phosphatidylinositol 5-phosphate 4-kinase type-2 beta               | Q80XI4 | NO  | NO  | NO  | YES | NO  | NO  | P    |
| BDH1 D-beta-hydroxybutyrate dehydrogenase, mitochondrial                  | Q80XN0 | NO  | YES | NO  | NO  | NO  | NO  | P    |
| NUCKS Nuclear ubiquitous casein and cyclin-dependent kinase substrate 1   | Q80XU3 | NO  | NO  | NO  | YES | NO  | YES | P/MQ |
| GLRX5 Glutaredoxin-related protein 5, mitochondrial                       | Q80Y14 | YES | NO  | NO  | NO  | YES | NO  | P    |
| SPT20 Spermatogenesis-associated protein 20                               | Q80YT5 | NO  | YES | NO  | NO  | NO  | NO  | P    |
| TENA Tenascin                                                             | Q80YX1 | NO  | NO  | NO  | NO  | YES | YES | P    |
| DLG1 Disks large homolog 1                                                | Q811D0 | YES | NO  | NO  | YES | NO  | NO  | P    |
| GALD1 Glutamine amidotransferase-like class 1 domain-containing protein 1 | Q8BFQ8 | NO  | NO  | NO  | YES | YES | YES | P/MQ |
| GNS N-acetylglucosamine-6-sulfatase                                       | Q8BFR4 | NO  | NO  | NO  | YES | YES | NO  | P    |
| EFTU Elongation factor Tu, mitochondrial                                  | Q8BFR5 | YES | NO  | YES | YES | YES | YES | P/MQ |
| LPP Lipoma-preferred partner homolog                                      | Q8BFW7 | YES | NO  | YES | YES | YES | YES | P/MQ |
| TNPO1 Transportin-1                                                       | Q8BFY9 | NO  | NO  | NO  | NO  | YES | NO  | P    |
| ACTBL Beta-actin-like protein 2                                           | Q8BFZ3 | NO  | NO  | NO  | YES | YES | YES | P/MQ |
| ERLN2 Erlin-2                                                             | Q8BFZ9 | NO  | NO  | NO  | NO  | YES | NO  | P    |

|                                                             |        |     |     |     |     |     |     |      |
|-------------------------------------------------------------|--------|-----|-----|-----|-----|-----|-----|------|
| ROA3 Heterogeneous nuclear ribonucleoprotein A3             | Q8BG05 | YES | NO  | YES | YES | YES | YES | P/MQ |
| PSD11 26S proteasome non-ATPase regulatory subunit 11       | Q8BG32 | YES | NO  | YES | YES | YES | YES | P/MQ |
| PDIP3 Polymerase delta-interacting protein 3                | Q8BG81 | YES | NO  | NO  | YES | YES | YES | P/MQ |
| COMD7 COMM domain-containing protein 7                      | Q8BG94 | NO  | YES | NO  | NO  | NO  | NO  | P    |
| ACSM5 Acyl-coenzyme A synthetase ACSM5, mitochondrial       | Q8BGA8 | YES | NO  | NO  | NO  | NO  | NO  | P    |
| HTSF1 HIV Tat-specific factor 1 homolog                     | Q8BGC0 | NO  | YES | NO  | NO  | NO  | NO  | P/MQ |
| PTGR3 Prostaglandin reductase-3                             | Q8BGC4 | NO  | YES | NO  | NO  | NO  | NO  | P    |
| IF4B Eukaryotic translation initiation factor 4B            | Q8BGD9 | YES | NO  | YES | YES | YES | YES | P/MQ |
| SAM50 Sorting and assembly machinery component 50 homolog   | Q8BGH2 | NO  | YES | NO  | NO  | NO  | NO  | P    |
| SYAC Alanine--tRNA ligase, cytoplasmic                      | Q8BGQ7 | NO  | NO  | NO  | YES | YES | NO  | P    |
| E41L5 Band 4.1-like protein 5                               | Q8BGS1 | NO  | YES | NO  | NO  | NO  | NO  | P    |
| TACD2 Tumor-associated calcium signal transducer 2          | Q8BGV3 | NO  | YES | NO  | NO  | NO  | NO  | P    |
| AL8A1 2-aminomuconic semialdehyde dehydrogenase             | Q8BH00 | YES | NO  | NO  | NO  | YES | NO  | P    |
| PCK2 Phosphoenolpyruvate carboxykinase [GTP], mitochondrial | Q8BH04 | NO  | NO  | NO  | YES | NO  | NO  | P    |
| WASF2 Wiskott-Aldrich syndrome protein family member 2      | Q8BH43 | NO  | NO  | NO  | YES | YES | YES | P/MQ |
| CMC1 Calcium-binding mitochondrial carrier protein Aralar1  | Q8BH59 | NO  | YES | NO  | NO  | NO  | NO  | P    |
| F13A Coagulation factor XIII A chain                        | Q8BH61 | NO  | NO  | YES | YES | YES | YES | P/MQ |
| GLUCM D-glutamate cyclase, mitochondrial                    | Q8BH86 | YES | NO  | NO  | NO  | YES | NO  | P    |
| RCN3 Reticulocalbin-3                                       | Q8BH97 | NO  | NO  | NO  | YES | NO  | NO  | P    |
| PTBP3 Polypyrimidine tract-binding protein 3                | Q8BHD7 | NO  | NO  | NO  | YES | NO  | YES | P    |
| NRDC Nardilysin                                             | Q8BHG1 | NO  | NO  | NO  | NO  | NO  | YES | P    |
| CZIB CXXC motif containing zinc binding protein             | Q8BHG2 | NO  | NO  | NO  | YES | NO  | NO  | P    |
| TB10B TBC1 domain family member 10B                         | Q8BHL3 | NO  | NO  | NO  | YES | NO  | NO  | P    |
| PSMF1 Proteasome inhibitor PI31 subunit                     | Q8BHL8 | NO  | YES | NO  | NO  | NO  | NO  | P    |

|                                                                                                           |        |     |     |     |     |     |     |      |
|-----------------------------------------------------------------------------------------------------------|--------|-----|-----|-----|-----|-----|-----|------|
| GANAB Neutral alpha-glucosidase AB                                                                        | Q8BHN3 | YES | NO  | YES | YES | YES | YES | P/MQ |
| CEMIP Cell migration-inducing and hyaluronan-binding protein                                              | Q8BI06 | NO  | YES | NO  | NO  | NO  | NO  | P    |
| MAL2 Protein MAL2                                                                                         | Q8BI08 | NO  | YES | NO  | NO  | NO  | NO  | P/MQ |
| CARF CDKN2A-interacting protein                                                                           | Q8BI72 | NO  | NO  | NO  | YES | YES | YES | P/MQ |
| TGO1 Transport and Golgi organization protein 1 homolog                                                   | Q8BI84 | NO  | NO  | NO  | YES | NO  | NO  | P    |
| SYIM Isoleucine--tRNA ligase, mitochondrial                                                               | Q8BIJ6 | NO  | YES | NO  | NO  | NO  | NO  | P    |
| CSTF2 Cleavage stimulation factor subunit 2                                                               | Q8BIQ5 | NO  | NO  | NO  | YES | NO  | NO  | P    |
| CHDH Choline dehydrogenase, mitochondrial                                                                 | Q8BJ64 | YES | NO  | NO  | NO  | YES | NO  | P/MQ |
| NUP93 Nuclear pore complex protein Nup93                                                                  | Q8BJ71 | NO  | NO  | NO  | YES | NO  | NO  | P    |
| CHM2B Charged multivesicular body protein 2b                                                              | Q8BJF9 | NO  | NO  | NO  | YES | NO  | NO  | P    |
| SMAL1 SWI/SNF-related matrix-associated actin-dependent regulator of chromatin subfamily A-like protein 1 | Q8BJL0 | NO  | YES | NO  | NO  | NO  | NO  | P    |
| SUN2 SUN domain-containing protein 2                                                                      | Q8BJS4 | NO  | NO  | YES | YES | YES | YES | P    |
| SGTA Small glutamine-rich tetratricopeptide repeat-containing protein alpha                               | Q8BJU0 | NO  | NO  | NO  | NO  | YES | NO  | P    |
| EIF2A Eukaryotic translation initiation factor 2A                                                         | Q8BJW6 | NO  | NO  | YES | YES | YES | YES | P/MQ |
| PSMD5 26S proteasome non-ATPase regulatory subunit 5                                                      | Q8BJY1 | NO  | YES | NO  | NO  | NO  | NO  | P    |
| RT35 28S ribosomal protein S35, mitochondrial                                                             | Q8BJZ4 | NO  | YES | NO  | NO  | NO  | NO  | P    |
| NDUV3 NADH dehydrogenase [ubiquinone] flavoprotein 3, mitochondrial                                       | Q8BK30 | YES | YES | NO  | NO  | NO  | NO  | P/MQ |
| AHSA1 Activator of 90 kDa heat shock protein ATPase homolog 1                                             | Q8BK64 | NO  | NO  | NO  | NO  | YES | NO  | P    |
| RCC2 Protein RCC2                                                                                         | Q8BK67 | NO  | NO  | YES | YES | YES | YES | P/MQ |
| IPO5 Importin-5                                                                                           | Q8BKC5 | NO  | NO  | NO  | YES | NO  | NO  | P    |
| BAIP2 Brain-specific angiogenesis inhibitor 1-associated protein 2                                        | Q8BKX1 | NO  | YES | NO  | NO  | NO  | NO  | P    |



|                                                                                                               |        |     |     |     |     |     |     |      |
|---------------------------------------------------------------------------------------------------------------|--------|-----|-----|-----|-----|-----|-----|------|
| PDHX Pyruvate dehydrogenase protein X component, mitochondrial                                                | Q8BKZ9 | NO  | YES | NO  | NO  | NO  | NO  | P    |
| EEA1 Early endosome antigen 1                                                                                 | Q8BL66 | YES | NO  | NO  | YES | YES | YES | P/MQ |
| SRSF7 Serine/arginine-rich splicing factor 7                                                                  | Q8BL97 | NO  | NO  | YES | YES | YES | YES | P/MQ |
| NCEH1 Neutral cholesterol ester hydrolase 1                                                                   | Q8BLF1 | NO  | NO  | NO  | NO  | YES | NO  | P    |
| SRP68 Signal recognition particle subunit SRP68                                                               | Q8BMA6 | NO  | NO  | NO  | YES | YES | NO  | P/MQ |
| VATG3 V-type proton ATPase subunit G 3                                                                        | Q8BMC1 | YES | NO  | NO  | NO  | YES | YES | P/MQ |
| ODP2 Dihydrolipoyllysine-residue acetyltransferase component of pyruvate dehydrogenase complex, mitochondrial | Q8BMF4 | YES | NO  | YES | YES | YES | NO  | P/MQ |
| SYLC Leucine--tRNA ligase, cytoplasmic                                                                        | Q8BMJ2 | NO  | NO  | NO  | YES | NO  | YES | P    |
| IF1AX Eukaryotic translation initiation factor 1A, X-chromosomal                                              | Q8BMJ3 | NO  | NO  | NO  | YES | YES | NO  | P    |
| CKAP4 Cytoskeleton-associated protein 4                                                                       | Q8BMK4 | YES | NO  | YES | YES | YES | YES | P/MQ |
| SYQ Glutamine--tRNA ligase                                                                                    | Q8BML9 | NO  | NO  | NO  | YES | NO  | YES | P    |
| GCP60 Golgi resident protein GCP60                                                                            | Q8BMP6 | NO  | NO  | YES | YES | YES | YES | P/MQ |
| ECHA Trifunctional enzyme subunit alpha, mitochondrial                                                        | Q8BMS1 | YES | NO  | YES | YES | YES | NO  | P/MQ |
| SFR1 Swi5-dependent recombination DNA repair protein 1 homolog                                                | Q8BP27 | NO  | NO  | NO  | YES | NO  | NO  | P    |
| PPA6 Lysophosphatidic acid phosphatase type 6                                                                 | Q8BP40 | YES | NO  | NO  | NO  | NO  | NO  | P    |
| SYNC Asparagine--tRNA ligase, cytoplasmic                                                                     | Q8BP47 | NO  | NO  | NO  | NO  | YES | NO  | P    |
| RL24 60S ribosomal protein L24                                                                                | Q8BP67 | YES | NO  | YES | YES | YES | YES | P/MQ |
| PPR18 Phostensin                                                                                              | Q8BQ30 | NO  | NO  | NO  | YES | YES | YES | P    |
| CPNE3 Copine-3                                                                                                | Q8BT60 | YES | NO  | YES | YES | YES | YES | P    |
| Serine/arginine repetitive matrix protein 2                                                                   | Q8BTI8 | YES | YES | YES | YES | YES | YES | MQ   |
| FLNA Filamin-A                                                                                                | Q8BTM8 | YES | NO  | YES | YES | YES | YES | P/MQ |
| NUP54 Nuclear pore complex protein Nup54                                                                      | Q8BTS4 | NO  | NO  | NO  | NO  | YES | NO  | P    |
| CPSF7 Cleavage and polyadenylation specificity factor subunit 7                                               | Q8BTV2 | NO  | NO  | NO  | YES | NO  | YES | P    |

|                                                               |        |     |     |     |     |     |     |      |
|---------------------------------------------------------------|--------|-----|-----|-----|-----|-----|-----|------|
| GMPPB Mannose-1-phosphate guanyltransferase beta              | Q8BTZ7 | NO  | YES | NO  | NO  | NO  | NO  | P    |
| SYIC Isoleucine--tRNA ligase, cytoplasmic                     | Q8BU30 | NO  | NO  | NO  | NO  | YES | NO  | P    |
| HOK3 Protein Hook homolog 3                                   | Q8BUK6 | NO  | YES | NO  | NO  | NO  | NO  | P    |
| GEPH Gephyrin                                                 | Q8BUV3 | NO  | YES | NO  | NO  | NO  | NO  | P    |
| TIDC1 Complex I assembly factor TIMMDC1, mitochondrial        | Q8BUY5 | NO  | YES | NO  | NO  | NO  | NO  | P    |
| IFIX Pyrin and HIN domain-containing protein 1                | Q8BV49 | NO  | NO  | YES | YES | YES | YES | P/MQ |
| VATH V-type proton ATPase subunit H                           | Q8BVE3 | YES | NO  | NO  | YES | YES | YES | P    |
| DHPR Dihydropteridine reductase                               | Q8BVI4 | YES | NO  | NO  | NO  | YES | NO  | P/MQ |
| PPME1 Protein phosphatase methylesterase 1                    | Q8BVQ5 | NO  | NO  | NO  | YES | NO  | NO  | P    |
| RL1D1 Ribosomal L1 domain-containing protein 1                | Q8BVY0 | NO  | NO  | NO  | YES | YES | NO  | P/MQ |
| SSDH Succinate-semialdehyde dehydrogenase, mitochondrial      | Q8BWF0 | YES | NO  | NO  | NO  | YES | NO  | P    |
| ACOT4 Acyl-coenzyme A thioesterase 4                          | Q8BWN8 | NO  | YES | NO  | NO  | NO  | NO  | P    |
| CP062 UPF0505 protein C16orf62 homolog                        | Q8BWQ6 | NO  | YES | NO  | NO  | NO  | NO  | P    |
| OSGEP Probable tRNA N6-ade0sine threonylcarbamoyltransferase  | Q8BWU5 | NO  | YES | NO  | NO  | NO  | NO  | P    |
| LARP4 La-related protein 4                                    | Q8BWW4 | NO  | NO  | NO  | YES | NO  | NO  | P    |
| ERF1 Eukaryotic peptide chain release factor subunit 1        | Q8BWY3 | NO  | NO  | YES | YES | NO  | YES | P    |
| KANK2 KN motif and ankyrin repeat domain-containing protein 2 | Q8BX02 | NO  | YES | NO  | NO  | NO  | NO  | P    |
| GOLI4 Golgi integral membrane protein 4                       | Q8BXA1 | NO  | NO  | NO  | NO  | NO  | YES | P    |
| CLIC5 Chloride intracellular channel protein 5                | Q8BXK9 | NO  | YES | NO  | NO  | NO  | NO  | P    |
| UBP47 Ubiquitin carboxyl-terminal hydrolase 47                | Q8BY87 | YES | NO  | NO  | NO  | YES | NO  | P/MQ |
| TBCD Tubulin-specific chaperone D                             | Q8BYA0 | NO  | YES | NO  | NO  | NO  | NO  | P    |
| PCAT2 Lysophosphatidylcholine acyltransferase 2               | Q8BYI6 | NO  | NO  | NO  | YES | NO  | NO  | P    |
| YTHD3 YTH domain-containing family protein 3                  | Q8BYK6 | NO  | NO  | NO  | YES | NO  | YES | P/MQ |
| RHG25 Rho GTPase-activating protein 25                        | Q8BYW1 | NO  | NO  | NO  | YES | NO  | YES | P    |
| SWAHB Ankyrin repeat domain-containing protein SOWAHB         | Q8BZW2 | NO  | YES | NO  | NO  | NO  | NO  | P    |

|                                                                   |        |     |     |     |     |     |     |     |      |
|-------------------------------------------------------------------|--------|-----|-----|-----|-----|-----|-----|-----|------|
| NHLC2 NHL repeat-containing protein 2                             | Q8BZW8 | NO  | YES | NO  | NO  | NO  | NO  | NO  | P    |
| CHPT1 Cholinephosphotransferase 1                                 | Q8C025 | NO  | YES | NO  | NO  | NO  | NO  | NO  | P    |
| SYFA Phenylalanine--tRNA ligase alpha subunit                     | Q8C0C7 | NO  | NO  | NO  | NO  | YES | NO  | NO  | P    |
| VP26B Vacuolar protein sorting-associated protein 26B             | Q8C0E2 | NO  | NO  | NO  | NO  | NO  | NO  | YES | P    |
| ADAS Alkyldihydroxyacetonephosphate synthase, peroxisomal         | Q8C0I1 | NO  | NO  | NO  | YES | NO  | NO  | NO  | P    |
| TMX4 Thioredoxin-related transmembrane protein 4                  | Q8C0L0 | NO  | NO  | NO  | YES | YES | YES | YES | P    |
| LCAP Leucyl-cystinyl aminopeptidase                               | Q8C129 | NO  | NO  | NO  | YES | NO  | YES | YES | P    |
| DOCK8 Deducator of cytokinesis protein 8                          | Q8C147 | NO  | NO  | NO  | YES | NO  | NO  | NO  | P    |
| CPNE1 Copine-1                                                    | Q8C166 | NO  | NO  | YES | YES | YES | YES | YES | P    |
| SEP11 Septin-11                                                   | Q8C1B7 | YES | NO  | YES | YES | YES | YES | YES | P/MQ |
| RBM14 RNA-binding protein 14                                      | Q8C2Q3 | NO  | NO  | NO  | YES | YES | YES | YES | P    |
| DOCK2 Deducator of cytokinesis protein 2                          | Q8C3J5 | NO  | NO  | NO  | YES | NO  | YES | YES | P/MQ |
| RAE1L mRNA export factor                                          | Q8C570 | NO  | YES | NO  | NO  | NO  | NO  | NO  | P    |
| NAKD2 NAD kinase 2, mitochondrial                                 | Q8C5H8 | YES | NO  | NO  | NO  | NO  | NO  | NO  | P    |
| COT2 CCR4-OT transcription complex subunit 2                      | Q8C5L3 | NO  | YES | NO  | NO  | NO  | NO  | NO  | P    |
| GRSF1 G-rich sequence factor 1                                    | Q8C5Q4 | NO  | YES | NO  | NO  | NO  | NO  | NO  | P    |
| CLMN Calmin                                                       | Q8C5W0 | NO  | YES | NO  | NO  | NO  | NO  | NO  | P    |
| UBA3 NEDD8-activating enzyme E1 catalytic subunit                 | Q8C878 | NO  | YES | NO  | NO  | NO  | NO  | NO  | P    |
| CAF17 Putative transferase CAF17 homolog, mitochondrial           | Q8CAK1 | NO  | YES | NO  | NO  | NO  | NO  | NO  | P    |
| MIC60 MICOS complex subunit Mic60                                 | Q8CAQ8 | YES | NO  | YES | YES | YES | YES | YES | P/MQ |
| PARP9 Protein mono-ADP-ribosyltransferase PARP9                   | Q8CAS9 | NO  | YES | NO  | NO  | NO  | NO  | NO  | P    |
| THIC Acetyl-CoA acetyltransferase, cytosolic                      | Q8CAY6 | YES | NO  | NO  | NO  | NO  | NO  | NO  | P    |
| ABI1 Abl interactor 1                                             | Q8CBW3 | NO  | NO  | NO  | YES | NO  | NO  | NO  | P    |
| GATC Glutamyl-tRNA(Gln) amidotransferase subunit C, mitochondrial | Q8CBY0 | NO  | YES | NO  | NO  | NO  | NO  | NO  | P    |
| SYNPO Synaptopodin                                                | Q8CC35 | NO  | YES | NO  | NO  | NO  | NO  | NO  | P/MQ |



|                                                                         |        |     |     |     |     |     |     |      |
|-------------------------------------------------------------------------|--------|-----|-----|-----|-----|-----|-----|------|
| P66A Transcriptional repressor p66 alpha                                | Q8CHY6 | NO  | NO  | NO  | YES | NO  | NO  | P    |
| PDLI5 PDZ and LIM domain protein 5                                      | Q8CI51 | YES | NO  | YES | YES | YES | YES | P/MQ |
| PYGB Glycogen phosphorylase, brain form                                 | Q8CI94 | YES | NO  | NO  | YES | NO  | YES | P    |
| FERM2 Fermitin family homolog 2                                         | Q8CIB5 | NO  | YES | NO  | NO  | NO  | NO  | P    |
| COPA Coatamer subunit alpha                                             | Q8CIE6 | YES | NO  | YES | YES | YES | YES | P/MQ |
| BTD Biotinidase                                                         | Q8CIF4 | NO  | YES | NO  | NO  | NO  | NO  | P    |
| SIDT2 SID1 transmembrane family member 2                                | Q8CIF6 | NO  | YES | NO  | NO  | NO  | NO  | P    |
| PLCG2 1-phosphatidylinositol 4,5-bisphosphate phosphodiesterase gamma-2 | Q8CIH5 | NO  | NO  | NO  | YES | YES | YES | P    |
| PAK2 Serine/threonine-protein kinase PAK 2                              | Q8CIN4 | YES | NO  | YES | YES | YES | YES | P/MQ |
| ASPM Abnormal spindle-like microcephaly-associated protein homolog      | Q8CJ27 | NO  | YES | NO  | NO  | NO  | NO  | P    |
| CROCC Rootletin                                                         | Q8CJ40 | NO  | YES | NO  | NO  | NO  | NO  | P    |
| ELYS Protein ELYS                                                       | Q8CJF7 | NO  | NO  | NO  | YES | NO  | NO  | P    |
| AGO3 Protein argonaute-3                                                | Q8CJF9 | NO  | YES | NO  | NO  | NO  | NO  | P    |
| HMGCS1 Hydroxymethylglutaryl-CoA synthase, cytoplasmic                  | Q8JZK9 | NO  | YES | NO  | NO  | NO  | NO  | P    |
| AFG32 AFG3-like protein 2                                               | Q8JZQ2 | NO  | YES | NO  | NO  | NO  | NO  | P    |
| EIF3B Eukaryotic translation initiation factor 3 subunit B              | Q8JZQ9 | YES | NO  | YES | YES | YES | YES | P/MQ |
| NAGA N-acetylglucosamine-6-phosphate deacetylase                        | Q8JZV7 | NO  | NO  | NO  | YES | NO  | NO  | P    |
| BDH2 3-hydroxybutyrate dehydrogenase type 2                             | Q8JZV9 | YES | NO  | YES | NO  | YES | NO  | P    |
| Splicing factor 45                                                      | Q8JZX4 | NO  | YES | NO  | YES | NO  | YES | MQ   |
| UD3A2 UDP-glucuronosyltransferase 3A2                                   | Q8JZZ0 | NO  | YES | NO  | NO  | NO  | NO  | P    |
| TMA7 Translation machinery-associated protein 7                         | Q8K003 | NO  | NO  | NO  | YES | NO  | NO  | P    |
| OPLA 5-oxoprolinase                                                     | Q8K010 | YES | NO  | NO  | NO  | YES | NO  | P    |
| BCLF1 Bcl-2-associated transcription factor 1                           | Q8K019 | NO  | NO  | NO  | YES | NO  | NO  | P/MQ |
| SCAM1 Secretory carrier-associated membrane protein 1                   | Q8K021 | NO  | NO  | NO  | YES | YES | YES | P    |
| EFGM Elongation factor G, mitochondrial                                 | Q8K0D5 | NO  | YES | NO  | NO  | NO  | NO  | P    |

|                                                                               |        |     |     |     |     |     |     |      |
|-------------------------------------------------------------------------------|--------|-----|-----|-----|-----|-----|-----|------|
| FIBB Fibrinogen beta chain                                                    | Q8K0E8 | YES | NO  | YES | YES | YES | YES | P/MQ |
| ACSM2 Acyl-coenzyme A synthetase ACSM2, mitochondrial                         | Q8K0L3 | YES | NO  | YES | NO  | YES | NO  | P/MQ |
| HS12A Heat shock 70 kDa protein 12A                                           | Q8K0U4 | NO  | YES | NO  | NO  | NO  | NO  | P/MQ |
| PKHO2 Pleckstrin homology domain-containing family O member 2                 | Q8K124 | NO  | NO  | YES | YES | YES | YES | P/MQ |
| GALM Aldose 1-epimerase                                                       | Q8K157 | YES | YES | NO  | NO  | NO  | NO  | P/MQ |
| PDXK Pyridoxal kinase                                                         | Q8K183 | NO  | NO  | YES | NO  | YES | NO  | P    |
| URP2 Fermitin family homolog 3                                                | Q8K1B8 | NO  | NO  | YES | YES | YES | YES | P    |
| STX5 Syntaxin-5                                                               | Q8K1E0 | NO  | NO  | NO  | YES | NO  | NO  | P    |
| WIPF1 WAS/WASL-interacting protein family member 1                            | Q8K1I7 | NO  | NO  | NO  | YES | YES | YES | P    |
| DNM1L Dynamin-1-like protein                                                  | Q8K1M6 | YES | NO  | YES | YES | YES | YES | P/MQ |
| SPAS2 Spermatogenesis-associated serine-rich protein 2                        | Q8K1N4 | NO  | NO  | NO  | YES | NO  | NO  | P    |
| WDR11 WD repeat-containing protein 11                                         | Q8K1X1 | NO  | YES | NO  | NO  | NO  | NO  | P    |
| COQ9 Ubiquinone biosynthesis protein COQ9, mitochondrial                      | Q8K1Z0 | YES | YES | NO  | NO  | NO  | NO  | P    |
| ARFP2 Arfaptin-2                                                              | Q8K221 | NO  | YES | NO  | NO  | NO  | NO  | P    |
| GT251 Procollagen galactosyltransferase 1                                     | Q8K297 | NO  | NO  | NO  | YES | YES | YES | P    |
| SDHA Succinate dehydrogenase [ubiquinone] flavoprotein subunit, mitochondrial | Q8K2B3 | YES | NO  | YES | YES | YES | YES | P/MQ |
| OTU6B Deubiquitinase OTUD6B                                                   | Q8K2H2 | NO  | YES | NO  | NO  | NO  | NO  | P    |
| MANBA Beta-mannosidase                                                        | Q8K2I4 | NO  | YES | NO  | NO  | NO  | NO  | P    |
| AGFG1 Arf-GAP domain and FG repeat-containing protein 1                       | Q8K2K6 | NO  | NO  | NO  | YES | NO  | NO  | P    |
| SHOT1 Shootin-1                                                               | Q8K2Q9 | NO  | NO  | NO  | NO  | NO  | YES | P    |
| PP4R1 Serine/threonine-protein phosphatase 4 regulatory subunit 1             | Q8K2V1 | NO  | NO  | NO  | YES | NO  | NO  | P    |
| EVA1B Protein eva-1 homolog B                                                 | Q8K2Y3 | NO  | YES | NO  | NO  | NO  | NO  | P/MQ |
| MATR3 Matrin-3                                                                | Q8K310 | YES | NO  | YES | YES | YES | YES | P/MQ |

|                                                                             |        |     |     |     |     |     |     |      |
|-----------------------------------------------------------------------------|--------|-----|-----|-----|-----|-----|-----|------|
| SASH3 SAM and SH3 domain-containing protein 3                               | Q8K352 | NO  | NO  | NO  | YES | NO  | NO  | P    |
| CBR3 Carbonyl reductase [NADPH] 3                                           | Q8K354 | NO  | NO  | NO  | YES | NO  | NO  | P/MQ |
| DCC-interacting protein 13-alpha                                            | Q8K3H0 | NO  | YES | YES | YES | NO  | YES | MQ   |
| NDUS8 NADH dehydrogenase [ubiquinone] iron-sulfur protein 8, mitochondrial  | Q8K3J1 | NO  | YES | NO  | NO  | NO  | NO  | P    |
| GPC5C G-protein coupled receptor family C group 5 member C                  | Q8K3J9 | NO  | YES | NO  | NO  | NO  | NO  | P    |
| PREP Presequence protease, mitochondrial                                    | Q8K411 | NO  | YES | NO  | NO  | NO  | NO  | P    |
| EMIL2 EMILIN-2                                                              | Q8K482 | NO  | NO  | NO  | YES | NO  | NO  | P    |
| IRAK3 Interleukin-1 receptor-associated kinase 3                            | Q8K4B2 | NO  | NO  | NO  | NO  | YES | NO  | P    |
| ABLM1 Actin-binding LIM protein 1                                           | Q8K4G5 | NO  | YES | NO  | NO  | NO  | NO  | P    |
| ARHG6 Rho guanine nucleotide exchange factor 6                              | Q8K4I3 | NO  | NO  | NO  | YES | NO  | NO  | P/MQ |
| PANK1 Pantothenate kinase 1                                                 | Q8K4K6 | NO  | YES | NO  | NO  | NO  | NO  | P    |
| SVIL Supervillin                                                            | Q8K4L3 | NO  | NO  | YES | YES | YES | YES | P/MQ |
| NNRE NAD(P)H-hydrate epimerase                                              | Q8K4Z3 | NO  | YES | NO  | NO  | NO  | NO  | P    |
| SF3A1 Splicing factor 3A subunit 1                                          | Q8K4Z5 | YES | NO  | YES | YES | YES | YES | P/MQ |
| HIBCH 3-hydroxyisobutyryl-CoA hydrolase, mitochondrial                      | Q8QZS1 | NO  | YES | NO  | NO  | NO  | NO  | P    |
| THIL Acetyl-CoA acetyltransferase, mitochondrial                            | Q8QZT1 | YES | NO  | YES | YES | YES | YES | P/MQ |
| F151A Protein FAM151A                                                       | Q8QZW3 | NO  | YES | NO  | NO  | NO  | NO  | P    |
| EIF3L Eukaryotic translation initiation factor 3 subunit L                  | Q8QZY1 | NO  | NO  | NO  | YES | YES | YES | P/MQ |
| GLCK Glyceraldehyde kinase                                                  | Q8QZY2 | NO  | YES | NO  | NO  | NO  | NO  | P    |
| SF3B4 Splicing factor 3B subunit 4                                          | Q8QZY9 | NO  | YES | NO  | NO  | NO  | NO  | P/MQ |
| MARE2 Microtubule-associated protein RP/EB family member 2                  | Q8R001 | NO  | NO  | NO  | YES | NO  | NO  | P    |
| AIMP2 Aminoacyl tRNA synthase complex-interacting multifunctional protein 2 | Q8R010 | NO  | YES | NO  | NO  | NO  | NO  | P    |
| ICT1 Peptidyl-tRNA hydrolase ICT1, mitochondrial                            | Q8R035 | NO  | YES | NO  | NO  | NO  | NO  | P    |

|                                                                         |        |     |     |     |     |     |     |      |
|-------------------------------------------------------------------------|--------|-----|-----|-----|-----|-----|-----|------|
| ERF3A Eukaryotic peptide chain release factor GTP-binding subunit ERF3A | Q8R050 | NO  | NO  | NO  | YES | NO  | NO  | P    |
| HNRPL Heterogeneous nuclear ribonucleoprotein L                         | Q8R081 | NO  | NO  | YES | YES | YES | YES | P/MQ |
| SUOX Sulfite oxidase, mitochondrial                                     | Q8R086 | NO  | YES | NO  | NO  | NO  | NO  | P    |
| General transcription factor IIF subunit 2                              | Q8R0A0 | YES | YES | YES | YES | YES | YES | MQ   |
| FAHD1 Acylpyruvase FAHD1, mitochondrial                                 | Q8R0F8 | NO  | YES | NO  | NO  | NO  | NO  | P    |
| GGA1 ADP-ribosylation factor-binding protein GGA1                       | Q8R0H9 | NO  | NO  | NO  | NO  | YES | NO  | P    |
| HOT Hydroxyacid-oxoacid transhydrogenase, mitochondrial                 | Q8R0N6 | NO  | YES | NO  | NO  | NO  | NO  | P    |
| SGPL1 Sphingosine-1-phosphate lyase 1                                   | Q8R0X7 | NO  | NO  | NO  | YES | YES | YES | P    |
| APEH Acylamino-acid-releasing enzyme                                    | Q8R146 | YES | NO  | NO  | YES | NO  | NO  | P    |
| BPHL Valacyclovir hydrolase                                             | Q8R164 | YES | NO  | NO  | YES | YES | NO  | P/MQ |
| ERO1A ERO1-like protein alpha                                           | Q8R180 | NO  | NO  | NO  | YES | YES | NO  | P    |
| DOCK7 Deducator of cytokinesis protein 7                                | Q8R1A4 | NO  | YES | NO  | NO  | NO  | NO  | P    |
| EIF3C Eukaryotic translation initiation factor 3 subunit C              | Q8R1B4 | YES | NO  | YES | YES | YES | YES | P/MQ |
| PDLI2 PDZ and LIM domain protein 2                                      | Q8R1G6 | NO  | NO  | NO  | YES | YES | NO  | P    |
| QCR9 Cytochrome b-c1 complex subunit 9                                  | Q8R1I1 | YES | YES | NO  | NO  | NO  | NO  | P/MQ |
| H2AJ Histone H2A.J                                                      | Q8R1M2 | YES | NO  | YES | YES | YES | YES | P    |
| DC1L1 Cytoplasmic dynein 1 light intermediate chain 1                   | Q8R1Q8 | YES | NO  | YES | YES | YES | YES | P/MQ |
| CGRE1 Cell growth regulator with EF hand domain protein 1               | Q8R1U2 | NO  | YES | NO  | NO  | NO  | NO  | P    |
| TMED4 Transmembrane emp24 domain-containing protein 4                   | Q8R1V4 | NO  | NO  | NO  | YES | NO  | NO  | P    |
| CD177 CD177 antigen                                                     | Q8R2S8 | NO  | NO  | YES | YES | YES | YES | P/MQ |
| NUDT4 Diphosphoinositol polyphosphate phosphohydrolase 2                | Q8R2U6 | NO  | YES | NO  | NO  | NO  | NO  | P    |
| UBQL1 Ubiquilin-1                                                       | Q8R317 | NO  | NO  | NO  | YES | YES | YES | P/MQ |
| RFIP5 Rab11 family-interacting protein 5                                | Q8R361 | YES | NO  | YES | YES | YES | NO  | P/MQ |
| ACY2 Aspartoacylase                                                     | Q8R3P0 | NO  | YES | NO  | NO  | NO  | NO  | P    |



|                                                                                       |        |     |     |     |     |     |     |      |
|---------------------------------------------------------------------------------------|--------|-----|-----|-----|-----|-----|-----|------|
| CCD58 Coiled-coil domain-containing protein 58                                        | Q8R3Q6 | NO  | YES | NO  | NO  | NO  | NO  | P    |
| CS047 Uncharacterized protein C19orf47 homolog                                        | Q8R3Y5 | NO  | YES | NO  | NO  | NO  | NO  | P    |
| HEX11 Protein HEXIM1                                                                  | Q8R409 | NO  | NO  | NO  | YES | NO  | NO  | P    |
| ABCA3 ATP-binding cassette sub-family A member 3                                      | Q8R420 | NO  | YES | NO  | NO  | NO  | NO  | P    |
| IL36G Interleukin-36 gamma                                                            | Q8R460 | NO  | NO  | NO  | YES | YES | YES | P    |
| IRAK4 Interleukin-1 receptor-associated kinase 4                                      | Q8R4K2 | NO  | NO  | NO  | YES | NO  | NO  | P    |
| CLYBL Citramalyl-CoA lyase, mitochondrial                                             | Q8R4N0 | YES | NO  | YES | YES | YES | NO  | P    |
| NUP35 Nucleoporin NUP35                                                               | Q8R4R6 | NO  | NO  | NO  | YES | NO  | YES | P    |
| LUZP1 Leucine zipper protein 1                                                        | Q8R4U7 | NO  | NO  | NO  | YES | NO  | NO  | P    |
| SH3K1 SH3 domain-containing kinase-binding protein 1                                  | Q8R550 | NO  | NO  | NO  | YES | YES | YES | P/MQ |
| AB1IP Amyloid beta A4 precursor protein-binding family B member 1-interacting protein | Q8R5A3 | NO  | NO  | NO  | YES | NO  | NO  | P    |
| ACTY Beta-actinin                                                                     | Q8R5C5 | NO  | YES | NO  | NO  | NO  | NO  | P    |
| TMX1 Thioredoxin-related transmembrane protein 1                                      | Q8VBT0 | NO  | NO  | NO  | NO  | YES | NO  | P    |
| APOBR Apolipoprotein B receptor                                                       | Q8VBT6 | NO  | NO  | YES | YES | YES | YES | P/MQ |
| ASPC1 Tether containing UBX domain for GLUT4                                          | Q8VBT9 | NO  | NO  | NO  | YES | NO  | NO  | P    |
| CSN8 COP9 signalosome complex subunit 8                                               | Q8VBV7 | NO  | NO  | NO  | NO  | YES | NO  | P    |
| Cleft lip and palate transmembrane protein 1 homolog                                  | Q8VBZ3 | YES | YES | YES | YES | YES | YES | MQ   |
| HUTU Urocanate hydratase                                                              | Q8VC12 | NO  | YES | NO  | NO  | NO  | NO  | P    |
| TKFC Triokinase/FMN cyclase                                                           | Q8VC30 | YES | NO  | YES | YES | YES | NO  | P/MQ |
| S22A6 Solute carrier family 22 member 6                                               | Q8VC69 | NO  | YES | NO  | NO  | NO  | NO  | P    |
| SCRN2 Secernin-2                                                                      | Q8VCA8 | NO  | YES | NO  | NO  | NO  | NO  | P    |
| RPGF3 Rap guanine nucleotide exchange factor 3                                        | Q8VCC8 | NO  | YES | NO  | NO  | NO  | NO  | P    |
| MAVS Mitochondrial antiviral-signaling protein                                        | Q8VCF0 | NO  | YES | NO  | NO  | NO  | NO  | P    |
| FIBG Fibrinogen gamma chain                                                           | Q8VCM7 | YES | NO  | YES | YES | YES | YES | P/MQ |
| CGL Cystathionine gamma-lyase                                                         | Q8VCN5 | YES | NO  | NO  | NO  | YES | NO  | P    |
| TBCC Tubulin-specific chaperone C                                                     | Q8VCN9 | NO  | YES | NO  | NO  | NO  | NO  | P    |

|                                                                |        |     |     |     |     |     |     |     |      |
|----------------------------------------------------------------|--------|-----|-----|-----|-----|-----|-----|-----|------|
| Caldesmon 1                                                    | Q8VCQ8 | YES | MQ   |
| ABHEB Protein ABHD14B                                          | Q8VCR7 | YES | NO  | YES | NO  | YES | NO  | NO  | P    |
| AMPB Aminopeptidase B                                          | Q8VCT3 | NO  | NO  | NO  | YES | YES | YES | YES | P/MQ |
| CES1D Carboxylesterase 1D                                      | Q8VCT4 | YES | YES | NO  | NO  | NO  | NO  | NO  | P    |
| HIP1 Huntingtin-interacting protein 1                          | Q8VD75 | NO  | NO  | NO  | YES | NO  | NO  | NO  | P    |
| MYH9 Myosin-9                                                  | Q8VDD5 | YES | NO  | YES | YES | YES | YES | YES | P/MQ |
| VIGLN Vigilin                                                  | Q8VDJ3 | YES | NO  | YES | YES | YES | YES | YES | P/MQ |
| ADPGK ADP-dependent glucokinase                                | Q8VDL4 | NO  | NO  | NO  | YES | NO  | YES | YES | P    |
| PSMD2 26S proteasome non-ATPase regulatory subunit 2           | Q8VDM4 | NO  | NO  | YES | YES | YES | YES | YES | P/MQ |
| HNRL1 Heterogeneous nuclear ribonucleoprotein U-like protein 1 | Q8VDM6 | NO  | NO  | NO  | YES | NO  | NO  | NO  | P    |
| AT1A1 Sodium/potassium-transporting ATPase subunit alpha-1     | Q8VDN2 | YES | NO  | YES | YES | YES | YES | YES | P/MQ |
| MICA1 [F-actin]-monooxygenase MICAL1                           | Q8VDP3 | NO  | NO  | NO  | YES | NO  | NO  | NO  | P    |
| CCAR2 Cell cycle and apoptosis regulator protein 2             | Q8VDP4 | NO  | NO  | NO  | YES | NO  | YES | YES | P    |
| SIR2 NAD-dependent protein deacetylase sirtuin-2               | Q8VDQ8 | NO  | NO  | NO  | YES | YES | NO  | NO  | P    |
| RCC1 Regulator of chromosome condensation                      | Q8VE37 | YES | NO  | YES | YES | YES | YES | YES | P/MQ |
| PDC10 Programmed cell death protein 10                         | Q8VE70 | NO  | YES | NO  | NO  | NO  | NO  | NO  | P    |
| SRSF4 Serine/arginine-rich splicing factor 4                   | Q8VE97 | YES | NO  | NO  | YES | YES | YES | YES | P/MQ |
| LMCD1 LIM and cysteine-rich domains protein 1                  | Q8VEE1 | NO  | YES | NO  | NO  | NO  | NO  | NO  | P    |
| VPS4A Vacuolar protein sorting-associated protein 4A           | Q8VEJ9 | NO  | YES | NO  | NO  | NO  | NO  | NO  | P    |
| HNRPU Heterogeneous nuclear ribonucleoprotein U                | Q8VEK3 | YES | NO  | YES | YES | YES | YES | YES | P/MQ |
| MPCP Phosphate carrier protein, mitochondrial                  | Q8VEM8 | YES | NO  | YES | NO  | YES | YES | YES | P    |
| RBM39 RNA-binding protein 39                                   | Q8VH51 | NO  | NO  | YES | YES | YES | YES | YES | P/MQ |
| SEC63 Translocation protein SEC63 homolog                      | Q8VHE0 | NO  | NO  | NO  | NO  | YES | NO  | NO  | P    |
| CARTF Calcium-responsive transcription factor                  | Q8VHI4 | NO  | YES | NO  | NO  | NO  | NO  | NO  | P    |
| P66B Transcriptional repressor p66-beta                        | Q8VHR5 | NO  | NO  | NO  | YES | NO  | NO  | NO  | P    |
| PAXI Paxillin                                                  | Q8VI36 | NO  | NO  | NO  | YES | YES | NO  | NO  | P    |

|                                                                    |        |     |     |     |     |     |     |      |
|--------------------------------------------------------------------|--------|-----|-----|-----|-----|-----|-----|------|
| SFPQ Splicing factor, proline- and glutamine-rich                  | Q8VIJ6 | YES | NO  | YES | YES | YES | YES | P/MQ |
| BSND Barttin                                                       | Q8VIM4 | NO  | YES | NO  | NO  | NO  | NO  | P    |
| TRAM1 Translocating chain-associated membrane protein 1            | Q91V04 | NO  | NO  | NO  | YES | NO  | NO  | P    |
| RAB14 Ras-related protein Rab-14                                   | Q91V41 | YES | NO  | YES | YES | YES | YES | P/MQ |
| SFXN3 Sideroflexin-3                                               | Q91V61 | YES | NO  | NO  | YES | YES | NO  | P/MQ |
| ISOC1 Isochorismatase domain-containing protein 1                  | Q91V64 | YES | NO  | NO  | YES | YES | YES | P/MQ |
| CK054 Ester hydrolase C11orf54 homolog                             | Q91V76 | YES | NO  | YES | NO  | YES | NO  | P    |
| ACLY ATP-citrate synthase                                          | Q91V92 | NO  | NO  | YES | YES | YES | YES | P/MQ |
| ACSM1 Acyl-coenzyme A synthetase ACSM1, mitochondrial              | Q91VA0 | NO  | YES | NO  | NO  | NO  | NO  | P    |
| PDIP2 Polymerase delta-interacting protein 2                       | Q91VA6 | NO  | YES | NO  | NO  | NO  | NO  | P    |
| IF4A3 Eukaryotic initiation factor 4A-III                          | Q91VC3 | NO  | NO  | NO  | YES | YES | NO  | P    |
| PLVAP Plasmalemma vesicle-associated protein                       | Q91VC4 | YES | YES | NO  | NO  | NO  | NO  | P    |
| NDUS1 NADH-ubiquinone oxidoreductase 75 kDa subunit, mitochondrial | Q91VD9 | YES | NO  | YES | YES | YES | YES | P/MQ |
| SNX9 Sorting nexin-9                                               | Q91VH2 | NO  | NO  | NO  | YES | YES | NO  | P    |
| RINI Ribonuclease inhibitor                                        | Q91VI7 | YES | NO  | YES | YES | YES | YES | P/MQ |
| PQBP1 Polyglutamine-binding protein 1                              | Q91VJ5 | NO  | NO  | NO  | YES | NO  | NO  | P    |
| IPYR2 Inorganic pyrophosphatase 2, mitochondrial                   | Q91VM9 | YES | NO  | NO  | NO  | YES | NO  | P/MQ |
| MIC25 MICOS complex subunit Mic25                                  | Q91VN4 | NO  | YES | NO  | NO  | NO  | NO  | P    |
| ATPG ATP synthase subunit gamma, mitochondrial                     | Q91VR2 | YES | NO  | YES | YES | YES | NO  | P/MQ |
| DDX1 ATP-dependent RNA helicase DDX1                               | Q91VR5 | YES | NO  | YES | YES | YES | NO  | P/MQ |
| CBR4 Carbonyl reductase family member 4                            | Q91VT4 | NO  | YES | NO  | NO  | NO  | NO  | P    |
| SH3L3 SH3 domain-binding glutamic acid-rich-like protein 3         | Q91VW3 | NO  | NO  | NO  | YES | YES | YES | P/MQ |
| UBAP2 Ubiquitin-associated protein 2                               | Q91VX2 | NO  | YES | NO  | NO  | NO  | NO  | P    |
| GCSP Glycine dehydrogenase (decarboxylating), mitochondrial        | Q91W43 | NO  | YES | NO  | NO  | NO  | NO  | P    |
| CSDE1 Cold shock domain-containing protein E1                      | Q91W50 | NO  | NO  | YES | YES | YES | NO  | P/MQ |

|                                                                            |        |     |     |     |     |     |     |      |
|----------------------------------------------------------------------------|--------|-----|-----|-----|-----|-----|-----|------|
| RBMS1 RNA-binding motif, single-stranded-interacting protein 1             | Q91W59 | NO  | NO  | NO  | YES | NO  | NO  | P    |
| NRK1 Nicotinamide riboside kinase 1                                        | Q91W63 | NO  | YES | NO  | NO  | NO  | NO  | P    |
| TXND5 Thioredoxin domain-containing protein 5                              | Q91W90 | NO  | NO  | YES | YES | YES | YES | P    |
| SETD3 Actin-histidine N-methyltransferase                                  | Q91WC0 | NO  | NO  | NO  | NO  | YES | NO  | P    |
| NDUS2 NADH dehydrogenase [ubiquinone] iron-sulfur protein 2, mitochondrial | Q91WD5 | YES | YES | NO  | NO  | NO  | NO  | P    |
| CES2C Acylcarnitine hydrolase                                              | Q91WG0 | YES | YES | NO  | NO  | NO  | NO  | P    |
| RABE2 Rab GTPase-binding effector protein 2                                | Q91WG2 | NO  | YES | NO  | NO  | NO  | NO  | P    |
| FUBP1 Far upstream element-binding protein 1                               | Q91WJ8 | YES | NO  | YES | YES | YES | YES | P/MQ |
| LRRF2 Leucine-rich repeat flightless-interacting protein 2                 | Q91WK0 | YES | NO  | NO  | NO  | YES | NO  | P/MQ |
| EIF3H Eukaryotic translation initiation factor 3 subunit H                 | Q91WK2 | NO  | NO  | NO  | YES | YES | NO  | P/MQ |
| EVA1A Protein eva-1 homolog A                                              | Q91WM6 | NO  | YES | NO  | NO  | NO  | NO  | P    |
| KMO Kynurenine 3-monooxygenase                                             | Q91WN4 | NO  | YES | NO  | NO  | NO  | NO  | P    |
| SPA3N Serine protease inhibitor A3N                                        | Q91WP6 | YES | NO  | YES | YES | YES | YES | P/MQ |
| SYYC Tyrosine--tRNA ligase, cytoplasmic                                    | Q91WQ3 | NO  | NO  | YES | YES | YES | NO  | P    |
| AK1CL Aldo-keto reductase family 1 member C21                              | Q91WR5 | YES | NO  | NO  | NO  | YES | NO  | P    |
| CISD1 CDGSH iron-sulfur domain-containing protein 1                        | Q91WS0 | YES | YES | NO  | NO  | NO  | NO  | P/MQ |
| RBM47 RNA-binding protein 47                                               | Q91WT8 | NO  | YES | NO  | NO  | NO  | NO  | P    |
| AS3MT Arsenite methyltransferase                                           | Q91WU5 | YES | YES | NO  | NO  | NO  | NO  | P    |
| NC2B Protein Dr1                                                           | Q91WV0 | NO  | NO  | YES | NO  | NO  | NO  | P    |
| PODO Podocin                                                               | Q91X05 | NO  | YES | NO  | NO  | NO  | NO  | P    |
| UROM Uromodulin                                                            | Q91X17 | YES | YES | NO  | NO  | NO  | NO  | P    |
| DCXR L-xylulose reductase                                                  | Q91X52 | NO  | NO  | NO  | NO  | YES | NO  | P    |
| HPX Hemopexin                                                              | Q91X72 | YES | NO  | YES | YES | YES | YES | P/MQ |
| ERLN1 Erlin-1                                                              | Q91X78 | NO  | YES | NO  | NO  | NO  | NO  | P    |
| GOLM1 Golgi membrane protein 1                                             | Q91XA2 | NO  | NO  | NO  | YES | NO  | NO  | P    |

|                                                                               |        |     |     |     |     |     |     |      |
|-------------------------------------------------------------------------------|--------|-----|-----|-----|-----|-----|-----|------|
| DAP1 Death-associated protein 1                                               | Q91XC8 | NO  | NO  | YES | YES | NO  | NO  | P    |
| VPS36 Vacuolar protein-sorting-associated protein 36                          | Q91XD6 | NO  | YES | NO  | NO  | NO  | NO  | P    |
| GLYAT Glycine N-acyltransferase                                               | Q91XE0 | YES | NO  | NO  | NO  | YES | NO  | P    |
| ACY3 N-acyl-aromatic-L-amino acid amidohydrolase (carboxylate-forming)        | Q91XE4 | YES | NO  | YES | NO  | YES | NO  | P    |
| PNPO Pyridoxine-5'-phosphate oxidase                                          | Q91XF0 | NO  | YES | NO  | NO  | NO  | NO  | P    |
| Leucine-rich HEV glycoprotein                                                 | Q91XL1 | YES | YES | YES | YES | YES | YES | MQ   |
| OSBL1 Oxysterol-binding protein-related protein 1                             | Q91XL9 | NO  | YES | NO  | NO  | NO  | NO  | P    |
| BASP1 Brain acid soluble protein 1                                            | Q91XV3 | NO  | NO  | YES | YES | YES | YES | P/MQ |
| S13A3 Solute carrier family 13 member 3                                       | Q91Y63 | NO  | YES | NO  | NO  | NO  | NO  | P    |
| ARLY Argininosuccinate lyase                                                  | Q91YI0 | YES | NO  | YES | YES | YES | NO  | P/MQ |
| ARRB2 Beta-arrestin-2                                                         | Q91YI4 | NO  | NO  | NO  | YES | YES | NO  | P    |
| SNX4 Sorting nexin-4                                                          | Q91YJ2 | NO  | YES | NO  | NO  | NO  | NO  | P/MQ |
| UAP1 UDP-N-acetylhexosamine pyrophosphorylase                                 | Q91YN5 | NO  | NO  | NO  | NO  | YES | NO  | P    |
| L2HDH L-2-hydroxyglutarate dehydrogenase, mitochondrial                       | Q91YP0 | NO  | YES | NO  | NO  | NO  | NO  | P    |
| NEUL Neurolysin, mitochondrial                                                | Q91YP2 | NO  | YES | NO  | NO  | NO  | NO  | P    |
| RPN1 Dolichyl-diphosphooligosaccharide--protein glycosyltransferase subunit 1 | Q91YQ5 | YES | NO  | YES | YES | YES | YES | P/MQ |
| TWF1 Twinfilin-1                                                              | Q91YR1 | YES | NO  | YES | YES | YES | YES | P/MQ |
| PRP6 Pre-mRNA-processing factor 6                                             | Q91YR7 | NO  | YES | NO  | NO  | NO  | NO  | P    |
| PTGR1 Prostaglandin reductase 1                                               | Q91YR9 | NO  | NO  | NO  | YES | NO  | NO  | P    |
| Kinesin light chain 2                                                         | Q91YS4 | YES | YES | YES | YES | YES | YES | MQ   |
| NDUV1 NADH dehydrogenase [ubiquinone] flavoprotein 1, mitochondrial           | Q91YT0 | YES | YES | NO  | NO  | NO  | NO  | P    |
| YTH domain-containing family protein 2                                        | Q91YT7 | YES | YES | YES | YES | NO  | YES | MQ   |
| DNJC3 DnaJ homolog subfamily C member 3                                       | Q91YW3 | NO  | NO  | NO  | YES | NO  | NO  | P    |
| GRHPR Glyoxylate reductase/hydroxypyruvate reductase                          | Q91Z53 | YES | NO  | YES | NO  | YES | YES | P/MQ |
| BMP2K BMP-2-inducible protein kinase                                          | Q91Z96 | NO  | YES | NO  | NO  | NO  | NO  | P    |

|                                                                                                     |        |     |     |     |     |     |     |      |
|-----------------------------------------------------------------------------------------------------|--------|-----|-----|-----|-----|-----|-----|------|
| PCCA Propionyl-CoA carboxylase alpha chain, mitochondrial                                           | Q91ZA3 | YES | NO  | YES | NO  | YES | NO  | P/MQ |
| UGPA UTP--glucose-1-phosphate uridylyltransferase                                                   | Q91ZJ5 | YES | NO  | YES | YES | YES | YES | P/MQ |
| LPIN1 Phosphatidate phosphatase LPIN1                                                               | Q91ZP3 | NO  | YES | NO  | NO  | NO  | NO  | P    |
| SNX18 Sorting nexin-18                                                                              | Q91ZR2 | NO  | NO  | NO  | YES | NO  | YES | P    |
| MIA2 Melanoma inhibitory activity protein 2                                                         | Q91ZV0 | NO  | NO  | NO  | YES | NO  | NO  | P    |
| SMCA5 SWI/SNF-related matrix-associated actin-dependent regulator of chromatin subfamily A member 5 | Q91ZW3 | NO  | NO  | YES | YES | YES | YES | P/MQ |
| LRP1 Prolow-density lipoprotein receptor-related protein 1                                          | Q91ZX7 | NO  | NO  | YES | YES | YES | YES | P/MQ |
| RISC Retinoid-inducible serine carboxypeptidase                                                     | Q920A5 | NO  | YES | NO  | NO  | NO  | NO  | P    |
| SP16H FACT complex subunit SPT16                                                                    | Q920B9 | NO  | NO  | NO  | YES | YES | YES | P/MQ |
| FPPS Farnesyl pyrophosphate synthase                                                                | Q920E5 | NO  | NO  | NO  | YES | NO  | NO  | P    |
| VPP4 V-type proton ATPase 116 kDa subunit a isoform 4                                               | Q920R6 | YES | YES | NO  | NO  | NO  | NO  | P    |
| RAB31 Ras-related protein Rab-31                                                                    | Q921E2 | NO  | NO  | NO  | YES | YES | NO  | P    |
| TADBP TAR DNA-binding protein 43                                                                    | Q921F2 | YES | NO  | YES | YES | YES | YES | P/MQ |
| HNRL1 Heterogeneous nuclear ribonucleoprotein L-like                                                | Q921F4 | NO  | NO  | NO  | YES | NO  | NO  | P    |
| LRCH4 Leucine-rich repeat and calponin homology domain-containing protein 4                         | Q921G6 | NO  | NO  | NO  | YES | YES | NO  | P    |
| ETFD Electron transfer flavoprotein-ubiquinone oxidoreductase, mitochondrial                        | Q921G7 | YES | NO  | YES | NO  | YES | NO  | P/MQ |
| THIKA 3-ketoacyl-CoA thiolase A, peroxisomal                                                        | Q921H8 | YES | NO  | YES | YES | YES | YES | P/MQ |
| TRFE Serotransferrin                                                                                | Q921I1 | YES | NO  | YES | YES | YES | YES | P/MQ |
| TMCO1 Calcium load-activated calcium channel                                                        | Q921L3 | NO  | NO  | NO  | NO  | YES | NO  | P    |
| SF3B3 Splicing factor 3B subunit 3                                                                  | Q921M3 | NO  | NO  | YES | YES | YES | YES | P/MQ |
| FA49B Protein FAM49B                                                                                | Q921M7 | NO  | NO  | NO  | YES | YES | YES | P/MQ |
| RM37 39S ribosomal protein L37, mitochondrial                                                       | Q921S7 | NO  | YES | NO  | NO  | NO  | NO  | P    |
| TOIP1 Torsin-1A-interacting protein 1                                                               | Q921T2 | NO  | YES | NO  | NO  | NO  | NO  | P    |

|                                                     |        |     |     |     |     |     |     |      |
|-----------------------------------------------------|--------|-----|-----|-----|-----|-----|-----|------|
| SMTN Smoothelin                                     | Q921U8 | YES | NO  | NO  | NO  | NO  | NO  | P    |
| MOB1A MOB kinase activator 1A                       | Q921Y0 | YES | NO  | NO  | YES | NO  | YES | P    |
| TFIP8 Tumor necrosis factor alpha-induced protein 8 | Q921Z5 | NO  | YES | NO  | NO  | NO  | NO  | P    |
| SYDC Aspartate--tRNA ligase, cytoplasmic            | Q922B2 | YES | NO  | YES | YES | YES | YES | P/MQ |
| ITPI2 Protein ITPRID2                               | Q922B9 | NO  | YES | NO  | NO  | NO  | NO  | P    |
| C1TC C-1-tetrahydrofolate synthase, cytoplasmic     | Q922D8 | YES | NO  | YES | YES | YES | YES | P/MQ |
| PCY2 Ethanolamine-phosphate cytidyltransferase      | Q922E4 | NO  | YES | NO  | NO  | NO  | NO  | P    |
| GMPPA Mannose-1-phosphate guanyltransferase alpha   | Q922H4 | NO  | NO  | NO  | NO  | YES | NO  | P    |
| CLIP1 CAP-Gly domain-containing linker protein 1    | Q922J3 | NO  | NO  | YES | YES | YES | YES | P/MQ |
| GLYR1 Putative oxidoreductase GLYR1                 | Q922P9 | NO  | NO  | NO  | NO  | YES | NO  | P    |
| MARC2 Mitochondrial amidoxime reducing component 2  | Q922Q1 | YES | NO  | NO  | NO  | NO  | NO  | P    |
| LRC59 Leucine-rich repeat-containing protein 59     | Q922Q8 | NO  | NO  | YES | YES | YES | NO  | P/MQ |
| PDIA6 Protein disulfide-isomerase A6                | Q922R8 | YES | NO  | YES | YES | YES | YES | P/MQ |
| UBXN1 UBX domain-containing protein 1               | Q922Y1 | NO  | NO  | NO  | YES | YES | YES | P    |
| BLVRB Flavin reductase (NADPH)                      | Q923D2 | NO  | NO  | NO  | YES | YES | YES | P/MQ |
| WBP11 WW domain-binding protein 11                  | Q923D5 | NO  | NO  | NO  | YES | NO  | NO  | P    |
| SC5A2 Sodium/glucose cotransporter 2                | Q923I7 | NO  | YES | NO  | NO  | NO  | NO  | P    |
| ST5 Suppression of tumorigenicity 5 protein         | Q924W7 | NO  | NO  | NO  | YES | NO  | NO  | P    |
| PAWR PRKC apoptosis WT1 regulator protein           | Q925B0 | YES | NO  | YES | YES | YES | YES | P/MQ |
| ATAD3 ATPase family AAA domain-containing protein 3 | Q925I1 | YES | NO  | NO  | NO  | NO  | NO  | P    |
| TALDO1 Transaldolase                                | Q93092 | YES | NO  | YES | YES | YES | YES | P/MQ |
| ROAA Heterogeneous nuclear ribonucleoprotein A/B    | Q99020 | NO  | NO  | YES | YES | YES | YES | P/MQ |
| MLYCD Malonyl-CoA decarboxylase, mitochondrial      | Q99J39 | NO  | YES | NO  | NO  | NO  | NO  | P    |
| SIAS Sialic acid synthase                           | Q99J77 | NO  | NO  | YES | YES | YES | YES | P/MQ |
| THTM 3-mercaptopyruvate sulfurtransferase           | Q99J99 | YES | NO  | NO  | YES | NO  | NO  | P    |
| STML2 Stomatin-like protein 2, mitochondrial        | Q99JB2 | NO  | NO  | NO  | YES | YES | NO  | P    |

|                                                                          |        |     |     |     |     |     |     |      |
|--------------------------------------------------------------------------|--------|-----|-----|-----|-----|-----|-----|------|
| AMNLS Protein amnionless                                                 | Q99JB7 | NO  | YES | NO  | NO  | NO  | NO  | P    |
| PSIP1 PC4 and SFRS1-interacting protein                                  | Q99JF8 | NO  | NO  | NO  | YES | NO  | NO  | P    |
| Musculoskeletal embryonic nuclear protein 1                              | Q99JI1 | YES | YES | YES | YES | YES | YES | MQ   |
| PSMD6 26S proteasome non-ATPase regulatory subunit 6                     | Q99JI4 | YES | NO  | YES | YES | YES | YES | P/MQ |
| RAP1B Ras-related protein Rap-1b                                         | Q99JI6 | NO  | NO  | YES | YES | YES | YES | P/MQ |
| SFXN1 Sideroflexin-1                                                     | Q99JR1 | YES | NO  | YES | YES | YES | NO  | P/MQ |
| TINAL Tubulointerstitial nephritis antigen-like                          | Q99JR5 | NO  | YES | NO  | NO  | NO  | NO  | P    |
| STK26 Serine/threonine-protein kinase 26                                 | Q99JT2 | NO  | NO  | NO  | NO  | NO  | YES | P/MQ |
| ACY1 Aminoacylase-1                                                      | Q99JW2 | NO  | YES | NO  | NO  | NO  | NO  | P    |
| GORS2 Golgi reassembly-stacking protein 2                                | Q99JX3 | NO  | NO  | NO  | YES | YES | NO  | P/MQ |
| ECHB Trifunctional enzyme subunit beta, mitochondrial                    | Q99JY0 | YES | NO  | NO  | YES | YES | NO  | P    |
| GIMA4 GTPase IMAP family member 4                                        | Q99JY3 | YES | NO  | YES | YES | YES | YES | P    |
| PLPP3 Phospholipid phosphatase 3                                         | Q99JY8 | NO  | YES | NO  | NO  | NO  | NO  | P    |
| ARP3 Actin-related protein 3                                             | Q99JY9 | YES | NO  | YES | YES | YES | YES | P/MQ |
| PDXD1 Pyridoxal-dependent decarboxylase domain-containing protein 1      | Q99K01 | NO  | YES | NO  | NO  | NO  | NO  | P    |
| ADP-ribosylation factor GTPase-activating protein 2                      | Q99K28 | YES | YES | YES | YES | YES | YES | MQ   |
| ES8L2 Epidermal growth factor receptor kinase substrate 8-like protein 2 | Q99K30 | YES | YES | NO  | NO  | NO  | NO  | P/MQ |
| EMIL1 EMILIN-1                                                           | Q99K41 | YES | NO  | YES | YES | YES | YES | P/MQ |
| 00 non-POU domain-containing octamer-binding protein                     | Q99K48 | NO  | NO  | YES | YES | YES | YES | P    |
| PLST Plastin-3                                                           | Q99K51 | YES | NO  | YES | NO  | YES | NO  | P/MQ |
| AASS Alpha-aminoadipic semialdehyde synthase, mitochondrial              | Q99K67 | YES | NO  | NO  | NO  | YES | NO  | P    |
| SERC Phosphoserine aminotransferase                                      | Q99K85 | YES | NO  | NO  | NO  | NO  | NO  | P    |
| GLO2 Hydroxyacylglutathione hydrolase, mitochondrial                     | Q99KB8 | NO  | YES | NO  | NO  | NO  | NO  | P/MQ |



|                                                            |        |     |     |     |     |     |     |      |
|------------------------------------------------------------|--------|-----|-----|-----|-----|-----|-----|------|
| VMA5A von Willebrand factor A domain-containing protein 5A | Q99KC8 | YES | NO  | YES | YES | YES | YES | P/MQ |
| ME2 NAD-dependent malic enzyme, mitochondrial              | Q99KE1 | NO  | YES | NO  | NO  | NO  | NO  | P    |
| TMED9 Transmembrane emp24 domain-containing protein 9      | Q99KF1 | NO  | NO  | YES | YES | YES | YES | P/MQ |
| RBM10 RNA-binding protein 10                               | Q99KG3 | NO  | NO  | NO  | YES | NO  | NO  | P    |
| STK24 Serine/threonine-protein kinase 24                   | Q99KH8 | NO  | NO  | YES | YES | YES | NO  | P/MQ |
| DCTN2 Dynactin subunit 2                                   | Q99KJ8 | YES | NO  | YES | YES | YES | YES | P/MQ |
| DPP3 Dipeptidyl peptidase 3                                | Q99KK7 | NO  | NO  | NO  | NO  | YES | NO  | P    |
| EPN4 Clathrin interactor 1                                 | Q99KN9 | YES | NO  | YES | YES | YES | YES | P/MQ |
| CRYL1 Lambda-crystallin homolog                            | Q99KP3 | YES | NO  | NO  | NO  | YES | NO  | P/MQ |
| PRP19 Pre-mRNA-processing factor 19                        | Q99KP6 | NO  | NO  | YES | YES | NO  | NO  | P/MQ |
| NAMPT Nicotinamide phosphoribosyltransferase               | Q99KQ4 | YES | NO  | YES | YES | YES | YES | P/MQ |
| LACB2 Endoribonuclease LACTB2                              | Q99KR3 | NO  | YES | NO  | NO  | NO  | NO  | P    |
| FUCO2 Plasma alpha-L-fucosidase                            | Q99KR8 | NO  | YES | NO  | NO  | NO  | NO  | P    |
| VMP1 Vacuole membrane protein 1                            | Q99KU0 | NO  | YES | NO  | NO  | NO  | NO  | P    |
| DJB11 Dnal homolog subfamily B member 11                   | Q99KV1 | YES | NO  | YES | YES | YES | YES | P/MQ |
| GAK Cyclin-G-associated kinase                             | Q99KY4 | NO  | NO  | NO  | YES | NO  | NO  | P    |
| DHRS1 Dehydrogenase/reductase SDR family member 1          | Q99L04 | NO  | NO  | NO  | YES | YES | NO  | P    |
| 3HIDH 3-hydroxyisobutyrate dehydrogenase, mitochondrial    | Q99L13 | YES | NO  | YES | YES | YES | YES | P/MQ |
| CDS2 Phosphatidate cytidyltransferase 2                    | Q99L43 | NO  | YES | NO  | NO  | NO  | NO  | P/MQ |
| IF2B Eukaryotic translation initiation factor 2 subunit 2  | Q99L45 | NO  | NO  | YES | NO  | NO  | YES | P/MQ |
| F10A1 Hsc70-interacting protein                            | Q99L47 | NO  | NO  | YES | YES | YES | YES | P/MQ |
| VATC2 V-type proton ATPase subunit C 2                     | Q99L60 | NO  | YES | NO  | NO  | NO  | NO  | P    |
| DHRS4 Dehydrogenase/reductase SDR family member 4          | Q99LB2 | YES | YES | NO  | NO  | NO  | NO  | P    |
| SARDH Sarcosine dehydrogenase, mitochondrial               | Q99LB7 | YES | NO  | NO  | NO  | YES | NO  | P/MQ |

|                                                                                    |        |     |     |     |     |     |     |      |
|------------------------------------------------------------------------------------|--------|-----|-----|-----|-----|-----|-----|------|
| NDUAA NADH dehydrogenase [ubiquinone] 1 alpha subcomplex subunit 10, mitochondrial | Q99LC3 | YES | YES | NO  | NO  | NO  | NO  | P    |
| ETFA Electron transfer flavoprotein subunit alpha, mitochondrial                   | Q99LC5 | YES | NO  | YES | YES | YES | YES | P/MQ |
| CSN1 COP9 signalosome complex subunit 1                                            | Q99LD4 | NO  | YES | NO  | NO  | NO  | NO  | P    |
| DDAH2 N(G),N(G)-dimethylarginine dimethylaminohydrolase 2                          | Q99LD8 | NO  | NO  | NO  | NO  | NO  | YES | P/MQ |
| RTCB tRNA-splicing ligase RtcB homolog                                             | Q99LF4 | NO  | NO  | YES | YES | YES | NO  | P    |
| HGS Hepatocyte growth factor-regulated tyrosine kinase substrate                   | Q99LI8 | NO  | YES | NO  | NO  | NO  | NO  | P    |
| CT2NL CTTNBP2 N-terminal-like protein                                              | Q99LJ0 | NO  | NO  | NO  | YES | NO  | NO  | P    |
| DPY30 Protein dpy-30 homolog                                                       | Q99LT0 | NO  | NO  | NO  | NO  | NO  | YES | P    |
| PARK7 Protein/nucleic acid deglycase DJ-1                                          | Q99LX0 | YES | NO  | YES | YES | YES | NO  | P    |
| PPIP2 Proline-serine-threonine phosphatase-interacting protein 2                   | Q99M15 | NO  | YES | NO  | NO  | NO  | NO  | P    |
| RNPS1 RNA-binding protein with serine-rich domain 1                                | Q99M28 | NO  | YES | NO  | NO  | NO  | NO  | P/MQ |
| NCK1 Cytoplasmic protein NCK1                                                      | Q99M51 | NO  | NO  | NO  | YES | NO  | NO  | P    |
| DNJA3 DnaJ homolog subfamily A member 3, mitochondrial                             | Q99M87 | NO  | YES | NO  | NO  | NO  | NO  | P    |
| ARBK1 Beta-adrenergic receptor kinase 1                                            | Q99MK8 | NO  | NO  | NO  | YES | NO  | NO  | P    |
| SYK Lysine--tRNA ligase                                                            | Q99MN1 | YES | NO  | YES | YES | YES | YES | P/MQ |
| PCCB Propionyl-CoA carboxylase beta chain, mitochondrial                           | Q99MN9 | YES | NO  | YES | NO  | YES | NO  | P/MQ |
| SRRT Serrate RNA effector molecule homolog                                         | Q99MR6 | NO  | NO  | YES | YES | NO  | NO  | P/MQ |
| MCCA Methylcrotonoyl-CoA carboxylase subunit alpha, mitochondrial                  | Q99MR8 | YES | YES | NO  | NO  | NO  | NO  | P    |
| MYO7B Unconventional myosin-VIb                                                    | Q99MZ6 | NO  | YES | NO  | NO  | NO  | NO  | P    |
| CAH15 Carbonic anhydrase 15                                                        | Q99N23 | NO  | YES | NO  | NO  | NO  | NO  | P    |
| RM27 39S ribosomal protein L27, mitochondrial                                      | Q99N92 | NO  | YES | NO  | NO  | NO  | NO  | P    |
| RM16 39S ribosomal protein L16, mitochondrial                                      | Q99N93 | NO  | YES | NO  | NO  | NO  | NO  | P    |

|                                                                              |        |     |     |     |     |     |     |      |
|------------------------------------------------------------------------------|--------|-----|-----|-----|-----|-----|-----|------|
| ACSS1 Acetyl-coenzyme A synthetase 2-like, mitochondrial                     | Q99NB1 | YES | YES | NO  | NO  | NO  | NO  | P    |
| SF3B1 Splicing factor 3B subunit 1                                           | Q99NB9 | YES | NO  | YES | YES | YES | YES | P/MQ |
| RTN4 Reticulon-4                                                             | Q99P72 | NO  | NO  | YES | YES | YES | YES | P/MQ |
| OGFR Opioid growth factor receptor                                           | Q99PG2 | NO  | NO  | NO  | YES | YES | NO  | P    |
| TS1R1 Taste receptor type 1 member 1                                         | Q99PG6 | NO  | YES | NO  | NO  | NO  | NO  | P    |
| GDIR1 Rho GDP-dissociation inhibitor 1                                       | Q99PT1 | YES | NO  | YES | YES | YES | YES | P/MQ |
| PRP8 Pre-mRNA-processing-splicing factor 8                                   | Q99PV0 | NO  | NO  | YES | YES | YES | YES | P/MQ |
| COX6C Cytochrome c oxidase subunit 6C                                        | Q9CPQ1 | NO  | NO  | YES | NO  | NO  | NO  | P/MQ |
| ATP5L ATP synthase subunit g, mitochondrial                                  | Q9CPQ8 | NO  | NO  | NO  | NO  | YES | NO  | P/MQ |
| RL17 60S ribosomal protein L17                                               | Q9CPR4 | YES | NO  | YES | YES | YES | YES | P/MQ |
| MYDGF Myeloid-derived growth factor                                          | Q9CPT4 | NO  | NO  | NO  | NO  | YES | NO  | P    |
| GLOD4 Glyoxalase domain-containing protein 4                                 | Q9CPV4 | YES | NO  | YES | YES | YES | YES | P/MQ |
| RM54 39S ribosomal protein L54, mitochondrial                                | Q9CPW3 | NO  | YES | NO  | NO  | NO  | NO  | P    |
| ARPC5 Actin-related protein 2/3 complex subunit 5                            | Q9CPW4 | NO  | NO  | YES | YES | YES | YES | P/MQ |
| ATG3 Ubiquitin-like-conjugating enzyme ATG3                                  | Q9CPX6 | NO  | NO  | NO  | YES | YES | NO  | P    |
| AMPL Cytosol aminopeptidase                                                  | Q9CPY7 | YES | NO  | YES | YES | YES | YES | P/MQ |
| MYL9 Myosin regulatory light polypeptide 9                                   | Q9CQ19 | NO  | YES | NO  | NO  | NO  | NO  | P    |
| LTOR1 Ragulator complex protein LAMTOR1                                      | Q9CQ22 | NO  | YES | NO  | NO  | NO  | NO  | P    |
| RM49 39S ribosomal protein L49, mitochondrial                                | Q9CQ40 | NO  | YES | NO  | NO  | NO  | NO  | P    |
| NDUC2 NADH dehydrogenase [ubiquinone] 1 subunit C2                           | Q9CQ54 | NO  | YES | NO  | NO  | NO  | NO  | P    |
| MTAP S-methyl-5'-thioadenosine phosphorylase                                 | Q9CQ65 | NO  | NO  | NO  | YES | YES | NO  | P    |
| QCR8 Cytochrome b-c1 complex subunit 8                                       | Q9CQ69 | YES | NO  | YES | YES | NO  | NO  | P    |
| NDUA2 NADH dehydrogenase [ubiquinone] 1 alpha subcomplex subunit 2           | Q9CQ75 | YES | NO  | YES | NO  | YES | NO  | P/MQ |
| FIS1 Mitochondrial fission 1 protein                                         | Q9CQ92 | NO  | NO  | NO  | YES | NO  | NO  | P/MQ |
| SDHB Succinate dehydrogenase [ubiquinone] iron-sulfur subunit, mitochondrial | Q9CQA3 | YES | NO  | YES | NO  | YES | NO  | P    |

|                                                                                  |        |     |     |     |     |     |     |      |
|----------------------------------------------------------------------------------|--------|-----|-----|-----|-----|-----|-----|------|
| BZW1 Basic leucine zipper and W2 domain-containing protein 1                     | Q9CQC6 | NO  | NO  | NO  | YES | NO  | NO  | P    |
| NDUB4 NADH dehydrogenase [ubiquinone] 1 beta subcomplex subunit 4                | Q9CQC7 | YES | NO  | YES | NO  | YES | NO  | P/MQ |
| RAB5A Ras-related protein Rab-5A                                                 | Q9CQD1 | NO  | YES | NO  | NO  | NO  | NO  | P    |
| RGS10 Regulator of G-protein signaling 10                                        | Q9CQE5 | NO  | NO  | NO  | YES | NO  | NO  | P    |
| RTRAF RNA transcription, translation and transport factor protein                | Q9CQE8 | YES | NO  | NO  | YES | YES | YES | P    |
| RM11 39S ribosomal protein L11, mitochondrial                                    | Q9CQF0 | NO  | YES | NO  | NO  | NO  | NO  | P    |
| CPSF5 Cleavage and polyadenylation specificity factor subunit 5                  | Q9CQF3 | NO  | NO  | YES | YES | YES | YES | P/MQ |
| PDZ1I PDZK1-interacting protein 1                                                | Q9CQH0 | NO  | YES | NO  | NO  | NO  | NO  | P/MQ |
| NDUB5 NADH dehydrogenase [ubiquinone] 1 beta subcomplex subunit 5, mitochondrial | Q9CQH3 | YES | YES | NO  | NO  | NO  | NO  | P    |
| BT3L4 Transcription factor BTF3 homolog 4                                        | Q9CQH7 | NO  | YES | NO  | NO  | NO  | NO  | P    |
| GMFB Glia maturation factor beta                                                 | Q9CQI3 | NO  | NO  | NO  | YES | NO  | NO  | P    |
| COTL1 Coactosin-like protein                                                     | Q9CQI6 | YES | NO  | YES | YES | YES | YES | P/MQ |
| DENR Density-regulated protein                                                   | Q9CQJ6 | NO  | NO  | NO  | NO  | NO  | YES | P    |
| RM18 39S ribosomal protein L18, mitochondrial                                    | Q9CQL5 | NO  | YES | NO  | NO  | NO  | NO  | P    |
| MOFA1 MORF4 family-associated protein 1                                          | Q9CQL7 | NO  | YES | NO  | NO  | NO  | NO  | P    |
| TXD17 Thioredoxin domain-containing protein 17                                   | Q9CQM5 | NO  | YES | NO  | NO  | NO  | NO  | P    |
| GLRX3 Glutaredoxin-3                                                             | Q9CQM9 | NO  | NO  | YES | YES | YES | NO  | P    |
| TRAP1 Heat shock protein 75 kDa, mitochondrial                                   | Q9CQN1 | YES | NO  | YES | YES | YES | NO  | P/MQ |
| AT5F1 ATP synthase F(0) complex subunit B1, mitochondrial                        | Q9CQQ7 | YES | NO  | NO  | YES | YES | YES | P    |
| RS21 40S ribosomal protein S21                                                   | Q9CQR2 | YES | NO  | YES | YES | YES | YES | P/MQ |
| ACOT13 Acyl-coenzyme A thioesterase 13                                           | Q9CQR4 | NO  | YES | NO  | NO  | NO  | NO  | P    |
| SC61B Protein transport protein Sec61 subunit beta                               | Q9CQS8 | NO  | NO  | NO  | YES | YES | YES | P/MQ |
| MTNA Methylthioribose-1-phosphate isomerase                                      | Q9CQT1 | NO  | YES | NO  | NO  | NO  | NO  | P    |
| TXD12 Thioredoxin domain-containing protein 12                                   | Q9CQU0 | NO  | YES | NO  | NO  | NO  | NO  | P    |

|                                                                     |        |     |     |     |     |     |     |      |
|---------------------------------------------------------------------|--------|-----|-----|-----|-----|-----|-----|------|
| RER1 Protein RER1                                                   | Q9CQU3 | NO  | YES | NO  | NO  | NO  | NO  | P    |
| TIM14 Mitochondrial import inner membrane translocase subunit TIM14 | Q9CQV7 | NO  | YES | NO  | NO  | NO  | NO  | P    |
| 1433B 14-3-3 protein beta/alpha                                     | Q9CQV8 | YES | NO  | YES | YES | YES | YES | P/MQ |
| YKT6 Synaptobrevin homolog YKT6                                     | Q9CQW1 | NO  | NO  | NO  | NO  | YES | NO  | P    |
| ARL8B ADP-ribosylation factor-like protein 8B                       | Q9CQW2 | NO  | YES | NO  | NO  | NO  | NO  | P    |
| RT36 28S ribosomal protein S36, mitochondrial                       | Q9CQX8 | YES | NO  | NO  | NO  | NO  | NO  | P    |
| NDUA6 NADH dehydrogenase [ubiquinone] 1 alpha subcomplex subunit 6  | Q9CQZ5 | NO  | YES | NO  | NO  | NO  | NO  | P    |
| NDUB3 NADH dehydrogenase [ubiquinone] 1 beta subcomplex subunit 3   | Q9CQZ6 | NO  | NO  | NO  | YES | YES | YES | P/MQ |
| PSMD9 26S proteasome non-ATPase regulatory subunit 9                | Q9CR00 | NO  | NO  | NO  | NO  | YES | NO  | P    |
| UFC1 Ubiquitin-fold modifier-conjugating enzyme 1                   | Q9CR09 | NO  | YES | NO  | NO  | NO  | NO  | P    |
| PPID Peptidyl-prolyl cis-trans isomerase D                          | Q9CR16 | NO  | NO  | NO  | YES | YES | YES | P/MQ |
| VTA1 Vacuolar protein sorting-associated protein VTA1 homolog       | Q9CR26 | NO  | NO  | NO  | NO  | YES | NO  | P    |
| VATG1 V-type proton ATPase subunit G 1                              | Q9CR51 | YES | NO  | YES | YES | YES | YES | P/MQ |
| RL14 60S ribosomal protein L14                                      | Q9CR57 | YES | NO  | YES | YES | YES | YES | P    |
| NADH dehydrogenase [ubiquinone] 1 beta subcomplex subunit 7         | Q9CR61 | YES | YES | NO  | YES | YES | YES | MQ   |
| M2OM Mitochondrial 2-oxoglutarate/malate carrier protein            | Q9CR62 | NO  | YES | NO  | NO  | NO  | NO  | P    |
| UCRI Cytochrome b-c1 complex subunit Rieske, mitochondrial          | Q9CR68 | YES | NO  | YES | YES | YES | YES | P    |
| CHSP1 Calcium-regulated heat stable protein 1                       | Q9CR86 | NO  | NO  | NO  | NO  | YES | NO  | P    |
| NHP2 H/ACA ribonucleoprotein complex subunit 2                      | Q9CRB2 | NO  | YES | NO  | NO  | NO  | NO  | P    |
| Tubulin polymerization-promoting protein family member 3            | Q9CRB6 | YES | YES | YES | YES | YES | YES | MQ   |
| MIC19 MICOS complex subunit Mic19                                   | Q9CRB9 | YES | NO  | YES | YES | YES | YES | P/MQ |
| OCAD1 OCIA domain-containing protein 1                              | Q9CRD0 | YES | NO  | NO  | YES | YES | NO  | P/MQ |

|                                                                   |        |     |     |     |     |     |     |      |
|-------------------------------------------------------------------|--------|-----|-----|-----|-----|-----|-----|------|
| EMC2 ER membrane protein complex subunit 2                        | Q9CRD2 | NO  | YES | NO  | NO  | NO  | NO  | P    |
| PRPS2 Ribose-phosphate pyrophosphokinase 2                        | Q9CS42 | NO  | YES | NO  | NO  | NO  | NO  | P    |
| SNW1 SNW domain-containing protein 1                              | Q9CSN1 | NO  | NO  | YES | YES | YES | YES | P    |
| RPR1B Regulation of nuclear pre-mRNA domain-containing protein 1B | Q9CSU0 | NO  | NO  | NO  | YES | YES | NO  | P/MQ |
| RANB3 Ran-binding protein 3                                       | Q9CT10 | NO  | NO  | NO  | YES | YES | YES | P/MQ |
| SMC1A Structural maintenance of chromosomes protein 1A            | Q9CU62 | NO  | NO  | NO  | YES | YES | YES | P/MQ |
| ARPC2 Actin-related protein 2/3 complex subunit 2                 | Q9CVB6 | NO  | NO  | YES | YES | YES | YES | P/MQ |
| SMC3 Structural maintenance of chromosomes protein 3              | Q9CW03 | NO  | NO  | YES | YES | YES | YES | P/MQ |
| RAVR1 Ribonucleoprotein PTB-binding 1                             | Q9CW46 | NO  | NO  | NO  | YES | YES | NO  | P/MQ |
| TBB2B Tubulin beta-2B chain                                       | Q9CWF2 | NO  | YES | NO  | NO  | NO  | NO  | P/MQ |
| PUR9 Bifunctional purine biosynthesis protein PURH                | Q9CWJ9 | YES | NO  | YES | YES | YES | YES | P/MQ |
| SNX2 Sorting nexin-2                                              | Q9CWK8 | YES | NO  | YES | YES | YES | YES | P/MQ |
| PFD1 Prefoldin subunit 1                                          | Q9CWM4 | NO  | NO  | NO  | YES | NO  | NO  | P    |
| DDAH1 N(G),N(G)-dimethylarginine dimethylaminohydrolase 1         | Q9CWS0 | YES | NO  | YES | YES | YES | NO  | P/MQ |
| RBM8A RNA-binding protein 8A                                      | Q9CWZ3 | NO  | YES | NO  | NO  | NO  | NO  | P    |
| IST1 IST1 homolog                                                 | Q9CX00 | NO  | YES | NO  | NO  | NO  | NO  | P    |
| SGT1 Protein SGT1 homolog                                         | Q9CX34 | NO  | NO  | NO  | NO  | NO  | YES | P    |
| CYGB Cytoglobin                                                   | Q9CX80 | NO  | YES | NO  | NO  | NO  | NO  | P    |
| ROA0 Heterogeneous nuclear ribonucleoprotein A0                   | Q9CX86 | NO  | NO  | YES | YES | YES | YES | P/MQ |
| T3HPD Trans-L-3-hydroxyproline dehydratase                        | Q9CXA2 | NO  | YES | NO  | NO  | NO  | NO  | P    |
| TBC15 TBC1 domain family member 15                                | Q9CXF4 | NO  | NO  | NO  | NO  | NO  | YES | P    |
| ABCB8 ATP-binding cassette sub-family B member 8, mitochondrial   | Q9CXJ4 | NO  | YES | NO  | NO  | NO  | NO  | P    |
| CG050 Uncharacterized protein C7orf50 homolog                     | Q9CXL3 | NO  | NO  | NO  | YES | NO  | YES | P    |
| DHRS7 Dehydrogenase/reductase SDR family member 7                 | Q9CXR1 | NO  | NO  | YES | YES | YES | YES | P    |

|                                                                            |        |     |     |     |     |     |     |      |
|----------------------------------------------------------------------------|--------|-----|-----|-----|-----|-----|-----|------|
| CENPV Centromere protein V                                                 | Q9CXS4 | YES | NO  | YES | YES | NO  | NO  | P/MQ |
| MPPB Mitochondrial-processing peptidase subunit beta                       | Q9CXT8 | NO  | YES | NO  | NO  | NO  | NO  | P    |
| CYBP Calcyclin-binding protein                                             | Q9CXW3 | NO  | NO  | NO  | YES | NO  | NO  | P    |
| RL11 60S ribosomal protein L11                                             | Q9CXW4 | YES | NO  | YES | YES | YES | YES | P/MQ |
| ILF2 Interleukin enhancer-binding factor 2                                 | Q9CXY6 | NO  | YES | NO  | NO  | NO  | NO  | P/MQ |
| NDUS4 NADH dehydrogenase [ubiquinone] iron-sulfur protein 4, mitochondrial | Q9CXZ1 | YES | NO  | YES | NO  | YES | NO  | P/MQ |
| RT28 28S ribosomal protein S28, mitochondrial                              | Q9CY16 | NO  | YES | NO  | NO  | NO  | NO  | P    |
| SNX7 Sorting nexin-7                                                       | Q9CY18 | NO  | YES | NO  | NO  | NO  | NO  | P    |
| SSRA Translocon-associated protein subunit alpha                           | Q9CY50 | NO  | NO  | NO  | NO  | YES | NO  | P    |
| PAIRB Plasminogen activator inhibitor 1 RNA-binding protein                | Q9CY58 | YES | NO  | YES | YES | YES | YES | P/MQ |
| BIEA Biliverdin reductase A                                                | Q9CY64 | YES | NO  | YES | YES | YES | YES | P    |
| TOM34 Mitochondrial import receptor subunit TOM34                          | Q9CYG7 | YES | NO  | YES | YES | YES | YES | P/MQ |
| PXL2A Peroxiredoxin-like 2A                                                | Q9CYH2 | NO  | YES | NO  | NO  | NO  | NO  | P    |
| LUC7L Putative RNA-binding protein Luc7-like 1                             | Q9CYI4 | NO  | YES | NO  | NO  | NO  | NO  | P/MQ |
| GAPR1 Golgi-associated plant pathogenesis-related protein 1                | Q9CYL5 | NO  | NO  | NO  | YES | NO  | NO  | P    |
| SPCS2 Signal peptidase complex subunit 2                                   | Q9CYN2 | NO  | YES | NO  | NO  | NO  | NO  | P    |
| TPD54 Tumor protein D54                                                    | Q9CYZ2 | YES | NO  | YES | YES | YES | YES | P/MQ |
| CSN7A COP9 signalosome complex subunit 7a                                  | Q9CZ04 | NO  | NO  | NO  | YES | NO  | NO  | P    |
| QCR1 Cytochrome b-c1 complex subunit 1, mitochondrial                      | Q9CZ13 | YES | NO  | YES | YES | YES | YES | P/MQ |
| SNF8 Vacuolar-sorting protein SNF8                                         | Q9CZ28 | NO  | YES | NO  | NO  | NO  | NO  | P    |
| OLA1 Obg-like ATPase 1                                                     | Q9CZ30 | NO  | NO  | NO  | YES | NO  | YES | P    |
| NNRD ATP-dependent (S)-NAD(P)H-hydrate dehydratase                         | Q9CZ42 | NO  | YES | NO  | NO  | NO  | NO  | P    |
| NSF1C NSFL1 cofactor p47                                                   | Q9CZ44 | YES | NO  | YES | YES | YES | YES | P/MQ |

|                                                                                           |        |     |     |     |     |     |     |      |
|-------------------------------------------------------------------------------------------|--------|-----|-----|-----|-----|-----|-----|------|
| MMAC Methylmalonic aciduria and homocystinuria type C protein homolog                     | Q9CZD0 | NO  | YES | NO  | NO  | NO  | NO  | P    |
| GARS Glycine--tRNA ligase                                                                 | Q9CZD3 | NO  | NO  | YES | YES | YES | YES | P    |
| RAB32 Ras-related protein Rab-32                                                          | Q9CZE3 | NO  | NO  | YES | YES | YES | YES | P    |
| MXRA7 Matrix-remodeling-associated protein 7                                              | Q9CZH7 | NO  | NO  | NO  | NO  | NO  | YES | P    |
| RL15 60S ribosomal protein L15                                                            | Q9CZM2 | YES | NO  | YES | YES | YES | YES | P/MQ |
| GLYM Serine hydroxymethyltransferase, mitochondrial                                       | Q9CZN7 | YES | NO  | YES | YES | YES | NO  | P/MQ |
| MTREX Exosome RNA helicase MTR4                                                           | Q9CZU3 | NO  | NO  | NO  | NO  | YES | NO  | P    |
| TOM70 Mitochondrial import receptor subunit TOM70                                         | Q9CZW5 | NO  | NO  | NO  | YES | NO  | NO  | P    |
| RS19 40S ribosomal protein S19                                                            | Q9CZX8 | YES | NO  | YES | YES | YES | YES | P/MQ |
| UB2V1 Ubiquitin-conjugating enzyme E2 variant 1                                           | Q9CZY3 | NO  | NO  | YES | YES | YES | NO  | P/MQ |
| 5NT3A Cytosolic 5'-nucleotidase 3A                                                        | Q9D020 | NO  | NO  | NO  | NO  | YES | NO  | P/MQ |
| PDHB Pyruvate dehydrogenase E1 component subunit beta, mitochondrial                      | Q9D051 | YES | NO  | YES | YES | YES | YES | P/MQ |
| SRSF9 Serine/arginine-rich splicing factor 9                                              | Q9D0B0 | NO  | NO  | NO  | YES | NO  | NO  | P    |
| HNRPM Heterogeneous nuclear ribonucleoprotein M                                           | Q9D0E1 | YES | NO  | YES | YES | YES | YES | P/MQ |
| LMAN1 Protein ERGIC-53                                                                    | Q9D0F3 | NO  | NO  | NO  | YES | YES | YES | P/MQ |
| PGM1 Phosphoglucomutase-1                                                                 | Q9D0F9 | YES | NO  | YES | YES | YES | YES | P/MQ |
| SYRC Arginine--tRNA ligase, cytoplasmic                                                   | Q9D0I9 | NO  | NO  | YES | YES | YES | YES | P/MQ |
| PTMS Parathyrosin                                                                         | Q9D0J8 | YES | NO  | YES | YES | YES | YES | P/MQ |
| MCES mRNA cap guanine-N7 methyltransferase                                                | Q9D0L8 | NO  | NO  | NO  | YES | NO  | NO  | P    |
| CY1 Cytochrome c1, heme protein, mitochondrial                                            | Q9D0M3 | YES | NO  | YES | YES | NO  | NO  | P    |
| SYTC Threonine--tRNA ligase, cytoplasmic                                                  | Q9D0R2 | NO  | NO  | NO  | YES | NO  | YES | P    |
| HINT2 Histidine triad nucleotide-binding protein 2, mitochondrial                         | Q9D0S9 | YES | NO  | YES | NO  | YES | NO  | P    |
| NH2L1 NHP2-like protein 1                                                                 | Q9D0T1 | NO  | NO  | YES | YES | YES | YES | P    |
| ILEUA Leukocyte elastase inhibitor A                                                      | Q9D154 | NO  | NO  | YES | YES | YES | YES | P/MQ |
| GAL3A Glutamine amidotransferase-like class 1 domain-containing protein 3A, mitochondrial | Q9D172 | YES | NO  | YES | YES | NO  | NO  | P/MQ |



|                                                                                                                       |        |     |     |     |     |     |     |      |
|-----------------------------------------------------------------------------------------------------------------------|--------|-----|-----|-----|-----|-----|-----|------|
| CNDP2 Cytosolic non-specific dipeptidase                                                                              | Q9D1A2 | YES | NO  | YES | YES | YES | YES | P/MQ |
| RM28 39S ribosomal protein L28, mitochondrial                                                                         | Q9D1B9 | NO  | YES | NO  | NO  | NO  | NO  | P    |
| TMEDA Transmembrane emp24 domain-containing protein 10                                                                | Q9D1D4 | NO  | NO  | YES | YES | NO  | YES | P/MQ |
| TBCB Tubulin-folding cofactor B                                                                                       | Q9D1E6 | NO  | NO  | NO  | YES | YES | NO  | P    |
| RAB1B Ras-related protein Rab-1B                                                                                      | Q9D1G1 | NO  | NO  | NO  | YES | YES | NO  | P    |
| RM14 39S ribosomal protein L14, mitochondrial                                                                         | Q9D1I6 | NO  | YES | NO  | NO  | NO  | NO  | P    |
| NECP2 Adaptin ear-binding coat-associated protein 2                                                                   | Q9D1J1 | NO  | NO  | NO  | YES | NO  | NO  | P/MQ |
| SARNP SAP domain-containing ribonucleoprotein                                                                         | Q9D1J3 | YES | NO  | NO  | YES | YES | YES | P/MQ |
| VATF V-type proton ATPase subunit F                                                                                   | Q9D1K2 | NO  | NO  | NO  | YES | YES | YES | P    |
| FKB11 Peptidyl-prolyl cis-trans isomerase FKBP11                                                                      | Q9D1M7 | NO  | NO  | NO  | NO  | YES | NO  | P    |
| RM13 39S ribosomal protein L13, mitochondrial                                                                         | Q9D1P0 | NO  | YES | NO  | NO  | NO  | NO  | P    |
| CHRD1 Cysteine and histidine-rich domain-containing protein 1                                                         | Q9D1P4 | NO  | NO  | NO  | YES | NO  | NO  | P    |
| ERP44 Endoplasmic reticulum resident protein 44                                                                       | Q9D1Q6 | NO  | NO  | NO  | YES | NO  | YES | P/MQ |
| RL34 60S ribosomal protein L34                                                                                        | Q9D1R9 | NO  | NO  | NO  | NO  | YES | NO  | P    |
| noL3 Nucleolar protein 3                                                                                              | Q9D1X0 | NO  | YES | NO  | NO  | NO  | NO  | P    |
| SPF27 Pre-mRNA-splicing factor SPF27                                                                                  | Q9D287 | NO  | NO  | NO  | YES | NO  | NO  | P    |
| DLST Dihydrolipoyllysine-residue succinyltransferase component of 2-oxoglutarate dehydrogenase complex, mitochondrial | Q9D2G2 | YES | NO  | YES | YES | YES | NO  | P/MQ |
| UB2V2 Ubiquitin-conjugating enzyme E2 variant 2                                                                       | Q9D2M8 | NO  | YES | NO  | NO  | NO  | NO  | P    |
| AACS Acetoacetyl-CoA synthetase                                                                                       | Q9D2R0 | NO  | NO  | NO  | YES | NO  | NO  | P    |
| COA3 Cytochrome c oxidase assembly factor 3 homolog, mitochondrial                                                    | Q9D2R6 | NO  | YES | NO  | NO  | NO  | NO  | P    |
| CORO7 Coronin-7                                                                                                       | Q9D2V7 | NO  | NO  | YES | YES | YES | YES | P/MQ |
| K1C20 Keratin, type I cytoskeletal 20                                                                                 | Q9D312 | NO  | YES | NO  | NO  | NO  | NO  | P    |
| RM19 39S ribosomal protein L19, mitochondrial                                                                         | Q9D338 | NO  | YES | NO  | NO  | NO  | NO  | P    |
| PPAC Low molecular weight phosphotyrosine protein phosphatase                                                         | Q9D358 | NO  | NO  | NO  | NO  | YES | NO  | P    |

|                                                                                  |        |     |     |     |     |     |     |      |
|----------------------------------------------------------------------------------|--------|-----|-----|-----|-----|-----|-----|------|
| HYEP Epoxide hydrolase 1                                                         | Q9D379 | NO  | YES | NO  | NO  | NO  | NO  | P    |
| ATPD ATP synthase subunit delta, mitochondrial                                   | Q9D3D9 | YES | NO  | YES | YES | YES | YES | P/MQ |
| SF3A3 Splicing factor 3A subunit 3                                               | Q9D554 | NO  | NO  | YES | YES | YES | YES | P/MQ |
| SYAP1 Synapse-associated protein 1                                               | Q9D5V6 | NO  | NO  | NO  | YES | NO  | NO  | P/MQ |
| RFIP1 Rab11 family-interacting protein 1                                         | Q9D620 | NO  | NO  | NO  | YES | NO  | NO  | P    |
| SC23B Protein transport protein Sec23B                                           | Q9D662 | NO  | NO  | NO  | YES | NO  | NO  | P    |
| S6A19 Sodium-dependent neutral amino acid transporter B(0)AT1                    | Q9D687 | NO  | YES | NO  | NO  | NO  | NO  | P    |
| NDUB8 NADH dehydrogenase [ubiquinone] 1 beta subcomplex subunit 8, mitochondrial | Q9D6J5 | NO  | NO  | NO  | NO  | YES | NO  | P    |
| NDUV2 NADH dehydrogenase [ubiquinone] flavoprotein 2, mitochondrial              | Q9D6J6 | YES | NO  | YES | YES | YES | NO  | P/MQ |
| IDH3A Isocitrate dehydrogenase [NAD] subunit alpha, mitochondrial                | Q9D6R2 | YES | NO  | YES | YES | YES | YES | P/MQ |
| RRFM Ribosome-recycling factor, mitochondrial                                    | Q9D6S7 | NO  | YES | NO  | NO  | NO  | NO  | P    |
| MSRA Mitochondrial peptide methionine sulfoxide reductase                        | Q9D6Y7 | YES | NO  | YES | YES | YES | YES | P/MQ |
| noP56 Nucleolar protein 56                                                       | Q9D6Z1 | YES | NO  | YES | YES | YES | YES | P    |
| TMX2 Thioredoxin-related transmembrane protein 2                                 | Q9D710 | NO  | YES | NO  | NO  | NO  | NO  | P    |
| TRIR Telomerase RNA component interacting RNase                                  | Q9D735 | NO  | NO  | NO  | YES | NO  | NO  | P    |
| PPIL2 RING-type E3 ubiquitin-protein ligase PPIL2                                | Q9D787 | NO  | YES | NO  | NO  | NO  | NO  | P    |
| ACAD8 Isobutyryl-CoA dehydrogenase, mitochondrial                                | Q9D7B6 | NO  | YES | NO  | NO  | NO  | NO  | P    |
| RTCA RNA 3'-terminal phosphate cyclase                                           | Q9D7H3 | NO  | YES | NO  | NO  | NO  | NO  | P    |
| APMAP Adipocyte plasma membrane-associated protein                               | Q9D7N9 | NO  | YES | NO  | NO  | NO  | NO  | P    |
| CHMP5 Charged multivesicular body protein 5                                      | Q9D7S9 | NO  | NO  | NO  | YES | NO  | NO  | P    |
| DUS3 Dual specificity protein phosphatase 3                                      | Q9D7X3 | NO  | NO  | NO  | YES | NO  | NO  | P    |
| IPYR Inorganic pyrophosphatase                                                   | Q9D819 | NO  | NO  | YES | NO  | YES | YES | P/MQ |
| PRXD1 Prolyl-tRNA synthetase associated domain-containing protein 1              | Q9D820 | NO  | YES | NO  | NO  | NO  | NO  | P    |

|                                                                     |        |     |     |     |     |     |     |      |
|---------------------------------------------------------------------|--------|-----|-----|-----|-----|-----|-----|------|
| FIP1 Pre-mRNA 3'-end-processing factor FIP1                         | Q9D824 | NO  | NO  | NO  | YES | NO  | NO  | P/MQ |
| SOX Peroxisomal sarcosine oxidase                                   | Q9D826 | YES | NO  | NO  | NO  | YES | NO  | P    |
| QCR7 Cytochrome b-c1 complex subunit 7                              | Q9D855 | YES | NO  | YES | YES | YES | YES | P/MQ |
| TIM50 Mitochondrial import inner membrane translocase subunit TIM50 | Q9D880 | NO  | NO  | NO  | NO  | YES | NO  | P    |
| U2AF1 Splicing factor U2AF 35 kDa subunit                           | Q9D883 | NO  | NO  | NO  | NO  | NO  | YES | P    |
| ITPA Inosine triphosphate pyrophosphatase                           | Q9D892 | NO  | YES | NO  | NO  | NO  | NO  | P/MQ |
| ARPL Actin-related protein 2/3 complex subunit 5-like protein       | Q9D898 | NO  | YES | NO  | NO  | NO  | NO  | P    |
| CHM4B Charged multivesicular body protein 4b                        | Q9D8B3 | YES | NO  | YES | YES | YES | YES | P/MQ |
| RL4 60S ribosomal protein L4                                        | Q9D8E6 | YES | NO  | YES | YES | YES | YES | P/MQ |
| GLOD5 Glyoxalase domain-containing protein 5                        | Q9D8I3 | NO  | YES | NO  | NO  | NO  | NO  | P    |
| EF1G Elongation factor 1-gamma                                      | Q9D8N0 | YES | NO  | YES | YES | YES | YES | P/MQ |
| ORN Oligoribonuclease, mitochondrial                                | Q9D8S4 | NO  | YES | NO  | NO  | NO  | NO  | P    |
| GSDMD Gasdermin-D                                                   | Q9D8T2 | NO  | NO  | NO  | YES | NO  | NO  | P    |
| SNX5 Sorting nexin-5                                                | Q9D8U8 | YES | NO  | YES | YES | YES | YES | P/MQ |
| PSD12 26S proteasome non-ATPase regulatory subunit 12               | Q9D8W5 | NO  | NO  | NO  | YES | YES | YES | P    |
| CC124 Coiled-coil domain-containing protein 124                     | Q9D8X2 | NO  | NO  | YES | YES | YES | NO  | P    |
| EFHD2 EF-hand domain-containing protein D2                          | Q9D8Y0 | YES | NO  | YES | YES | YES | YES | P/MQ |
| T126A Transmembrane protein 126A                                    | Q9D8Y1 | NO  | YES | NO  | NO  | NO  | NO  | P    |
| ST1C2 Sulfotransferase 1C2                                          | Q9D939 | NO  | YES | NO  | NO  | NO  | NO  | P    |
| DCPS m7GpppX diphosphatase                                          | Q9DAR7 | NO  | NO  | YES | YES | NO  | YES | P/MQ |
| MTU1 Mitochondrial tRNA-specific 2-thiouridylase 1                  | Q9DAT5 | NO  | YES | NO  | NO  | NO  | NO  | P    |
| CNPY3 Protein canopy homolog 3                                      | Q9DAU1 | NO  | NO  | NO  | YES | YES | YES | P/MQ |
| CNN3 Calponin-3                                                     | Q9DAW9 | NO  | NO  | NO  | NO  | YES | NO  | P/MQ |
| SNAA Alpha-soluble NSF attachment protein                           | Q9DB05 | NO  | NO  | NO  | YES | YES | YES | P/MQ |
| RM12 39S ribosomal protein L12, mitochondrial                       | Q9DB15 | YES | NO  | NO  | YES | NO  | YES | P/MQ |
| ATPO ATP synthase subunit O, mitochondrial                          | Q9DB20 | YES | NO  | YES | YES | YES | YES | P/MQ |

|                                                                               |        |     |     |     |     |     |     |      |
|-------------------------------------------------------------------------------|--------|-----|-----|-----|-----|-----|-----|------|
| IAH1 Isoamyl acetate-hydrolyzing esterase 1 homolog                           | Q9DB29 | YES | YES | NO  | NO  | NO  | NO  | P    |
| CHM2A Charged multivesicular body protein 2a                                  | Q9DB34 | NO  | NO  | NO  | NO  | NO  | YES | P    |
| QCR2 Cytochrome b-c1 complex subunit 2, mitochondrial                         | Q9DB77 | YES | NO  | YES | YES | YES | YES | P/MQ |
| KAP0 cAMP-dependent protein kinase type I-alpha regulatory subunit            | Q9DBC7 | NO  | NO  | NO  | YES | NO  | NO  | P    |
| CSAD Cysteine sulfinic acid decarboxylase                                     | Q9DBE0 | NO  | YES | NO  | NO  | NO  | NO  | P    |
| AL7A1 Alpha-aminoadipic semialdehyde dehydrogenase                            | Q9DBF1 | YES | NO  | YES | NO  | YES | NO  | P    |
| PLIN3 Perilipin-3                                                             | Q9DBG5 | NO  | NO  | YES | YES | YES | YES | P    |
| RPN2 Dolichyl-diphosphooligosaccharide--protein glycosyltransferase subunit 2 | Q9DBG6 | NO  | NO  | YES | YES | YES | YES | P/MQ |
| TX1B3 Tax1-binding protein 3                                                  | Q9DBG9 | YES | NO  | NO  | YES | NO  | YES | P/MQ |
| LMAN2 Vesicular integral-membrane protein VIP36                               | Q9DBH5 | NO  | NO  | YES | YES | YES | YES | P    |
| GDAP2 Ganglioside-induced differentiation-associated protein 2                | Q9DBL2 | NO  | YES | NO  | NO  | NO  | NO  | P    |
| COASY Bifunctional coenzyme A synthase                                        | Q9DBL7 | NO  | YES | NO  | NO  | NO  | NO  | P    |
| ECHP Peroxisomal bifunctional enzyme                                          | Q9DBM2 | YES | NO  | YES | NO  | YES | NO  | P/MQ |
| KCY UMP-CMP kinase                                                            | Q9DBP5 | YES | NO  | YES | YES | YES | YES | P/MQ |
| XRN2 5'-3' exoribonuclease 2                                                  | Q9DBR1 | NO  | NO  | NO  | YES | NO  | YES | P/MQ |
| MYPT1 Protein phosphatase 1 regulatory subunit 12A                            | Q9DBR7 | YES | NO  | YES | YES | YES | YES | P/MQ |
| TMM43 Transmembrane protein 43                                                | Q9DBS1 | NO  | NO  | NO  | NO  | YES | NO  | P    |
| KLC4 Kinesin light chain 4                                                    | Q9DBS5 | NO  | YES | NO  | NO  | NO  | NO  | P    |
| M2GD Dimethylglycine dehydrogenase, mitochondrial                             | Q9DBT9 | YES | NO  | YES | NO  | YES | YES | P    |
| SUSD2 Sushi domain-containing protein 2                                       | Q9DBX3 | NO  | YES | NO  | NO  | NO  | NO  | P    |
| KC1D Casein kinase I isoform delta                                            | Q9DC28 | NO  | YES | NO  | NO  | NO  | NO  | P    |
| GNAI3 Guanine nucleotide-binding protein G(k) subunit alpha                   | Q9DC51 | NO  | YES | NO  | NO  | NO  | NO  | P    |
| MPPA Mitochondrial-processing peptidase subunit alpha                         | Q9DC61 | NO  | YES | NO  | NO  | NO  | NO  | P    |

|                                                                                   |        |     |     |     |     |     |     |      |
|-----------------------------------------------------------------------------------|--------|-----|-----|-----|-----|-----|-----|------|
| NDUA9 NADH dehydrogenase [ubiquinone] 1 alpha subcomplex subunit 9, mitochondrial | Q9DC69 | NO  | YES | NO  | NO  | NO  | NO  | P/MQ |
| NDUS7 NADH dehydrogenase [ubiquinone] iron-sulfur protein 7, mitochondrial        | Q9DC70 | NO  | YES | NO  | NO  | NO  | NO  | P    |
| Pyrroline-5-carboxylate reductase 3                                               | Q9DCC4 | YES | YES | YES | YES | YES | YES | MQ   |
| Interferon gamma-induced GTPase                                                   | Q9DCE9 | YES | YES | YES | YES | YES | YES | MQ   |
| SSRG Translocon-associated protein subunit gamma                                  | Q9DCF9 | NO  | NO  | NO  | YES | YES | YES | P    |
| PBLD1 Phenazine biosynthesis-like domain-containing protein 1                     | Q9DCG6 | YES | NO  | NO  | NO  | YES | NO  | P    |
| ZFAN6 AN1-type zinc finger protein 6                                              | Q9DCH6 | NO  | YES | NO  | NO  | NO  | NO  | P    |
| NDUA8 NADH dehydrogenase [ubiquinone] 1 alpha subcomplex subunit 8                | Q9DCJ5 | YES | NO  | YES | YES | YES | NO  | P/MQ |
| NPL N-acetylneuraminate lyase                                                     | Q9DCJ9 | YES | YES | NO  | NO  | NO  | NO  | P    |
| IPP2 Protein phosphatase inhibitor 2                                              | Q9DCL8 | NO  | NO  | NO  | YES | NO  | NO  | P/MQ |
| PUR6 Multifunctional protein ADE2                                                 | Q9DCL9 | NO  | NO  | NO  | NO  | NO  | YES | P/MQ |
| ETHE1 Persulfide dioxygenase ETHE1, mitochondrial                                 | Q9DCM0 | YES | NO  | NO  | YES | NO  | NO  | P    |
| AP3S1 AP-3 complex subunit sigma-1                                                | Q9DCR2 | NO  | NO  | NO  | YES | YES | YES | P    |
| MTL26 Methyltransferase-like 26                                                   | Q9DCS2 | YES | YES | NO  | NO  | NO  | NO  | P    |
| NDUBA NADH dehydrogenase [ubiquinone] 1 beta subcomplex subunit 10                | Q9DCS9 | YES | NO  | YES | NO  | YES | NO  | P/MQ |
| AKCL2 1,5-anhydro-D-fructose reductase                                            | Q9DCT1 | NO  | NO  | NO  | YES | NO  | NO  | P    |
| NDUS3 NADH dehydrogenase [ubiquinone] iron-sulfur protein 3, mitochondrial        | Q9DCT2 | YES | NO  | YES | NO  | YES | NO  | P    |
| Cysteine-rich protein 2                                                           | Q9DCT8 | YES | YES | NO  | YES | YES | YES | MQ   |
| K2C7 Keratin, type II cytoskeletal 7                                              | Q9DCV7 | YES | NO  | YES | YES | YES | YES | P    |
| ETFB Electron transfer flavoprotein subunit beta                                  | Q9DCW4 | YES | NO  | YES | YES | YES | YES | P/MQ |
| ATP5H ATP synthase subunit d, mitochondrial                                       | Q9DCX2 | YES | NO  | YES | YES | YES | YES | P/MQ |
| KEG1 Glycine N-acyltransferase-like protein Keg1                                  | Q9DCY0 | YES | NO  | YES | NO  | YES | NO  | P    |
| MIC26 MICOS complex subunit Mic26                                                 | Q9DCZ4 | YES | YES | NO  | NO  | NO  | NO  | P/MQ |
| DTD1 D-aminoacyl-tRNA deacylase 1                                                 | Q9DD18 | NO  | YES | NO  | NO  | NO  | NO  | P/MQ |

|                                                                           |        |     |     |     |     |     |     |      |
|---------------------------------------------------------------------------|--------|-----|-----|-----|-----|-----|-----|------|
| SAC1 Phosphatidylinositide phosphatase SAC1                               | Q9EP69 | NO  | YES | NO  | NO  | NO  | NO  | P    |
| RAI14 Ankycorbin                                                          | Q9EP71 | NO  | NO  | NO  | YES | YES | YES | P    |
| ASC Apoptosis-associated speck-like protein containing a CARD             | Q9EPB4 | NO  | NO  | NO  | YES | NO  | NO  | P    |
| PARVA Alpha-parvin                                                        | Q9EPC1 | YES | NO  | YES | YES | YES | YES | P/MQ |
| ARFG1 ADP-ribosylation factor GTPase-activating protein 1                 | Q9EPJ9 | NO  | NO  | NO  | NO  | YES | NO  | P    |
| IPO7 Importin-7                                                           | Q9EPL8 | NO  | YES | NO  | NO  | NO  | NO  | P    |
| RENT1 Regulator of nonsense transcripts 1                                 | Q9EPU0 | NO  | NO  | NO  | YES | YES | YES | P/MQ |
| DHB11 Estradiol 17-beta-dehydrogenase 11                                  | Q9EQ06 | NO  | YES | NO  | NO  | NO  | NO  | P/MQ |
| MMSA Methylmalonate-semialdehyde dehydrogenase [acylating], mitochondrial | Q9EQ20 | YES | NO  | YES | YES | YES | NO  | P/MQ |
| VPS35 Vacuolar protein sorting-associated protein 35                      | Q9EQH3 | YES | NO  | YES | YES | YES | YES | P/MQ |
| MVP Major vault protein                                                   | Q9EQK5 | YES | NO  | YES | YES | YES | YES | P/MQ |
| T22D4 TSC22 domain family protein 4                                       | Q9EQN3 | NO  | NO  | NO  | YES | NO  | NO  | P    |
| EHD4 EH domain-containing protein 4                                       | Q9EQP2 | YES | NO  | YES | YES | YES | YES | P/MQ |
| SET Protein SET                                                           | Q9EQU5 | NO  | NO  | YES | YES | YES | YES | P/MQ |
| AIF1L Allograft inflammatory factor 1-like                                | Q9EQX4 | YES | YES | NO  | NO  | NO  | NO  | P    |
| STX12 Syntaxin-12                                                         | Q9ER00 | NO  | NO  | NO  | YES | NO  | YES | P    |
| SYCC Cysteine--tRNA ligase, cytoplasmic                                   | Q9ER72 | NO  | YES | NO  | NO  | NO  | NO  | P    |
| SNP29 Synaptosomal-associated protein 29                                  | Q9ERB0 | NO  | NO  | NO  | YES | YES | YES | P    |
| PARVG Gamma-parvin                                                        | Q9ERD8 | NO  | NO  | NO  | NO  | YES | NO  | P    |
| MESD LRP chaperone MESD                                                   | Q9ERE7 | NO  | NO  | NO  | YES | YES | NO  | P    |
| LIMA1 LIM domain and actin-binding protein 1                              | Q9ERG0 | YES | NO  | YES | YES | YES | YES | P/MQ |
| STRN3 Striatin-3                                                          | Q9ERG2 | NO  | YES | NO  | NO  | NO  | NO  | P    |
| XPO2 Exportin-2                                                           | Q9ERK4 | NO  | NO  | NO  | YES | NO  | NO  | P    |
| GMFG Glia maturation factor gamma                                         | Q9ERL7 | NO  | NO  | NO  | YES | NO  | NO  | P    |
| SCAM2 Secretory carrier-associated membrane protein 2                     | Q9ERNO | NO  | NO  | NO  | YES | NO  | NO  | P/MQ |



|                                                               |        |     |     |     |     |     |     |      |
|---------------------------------------------------------------|--------|-----|-----|-----|-----|-----|-----|------|
| NQO2 Ribosyldihydrionicotinamide dehydrogenase [quinone]      | Q9JI75 | NO  | NO  | NO  | YES | YES | NO  | P/MQ |
| SPHK2 Sphingosine kinase 2                                    | Q9JIA7 | NO  | YES | NO  | NO  | NO  | NO  | P    |
| ANM1 Protein arginine N-methyltransferase 1                   | Q9JIF0 | NO  | YES | NO  | NO  | NO  | NO  | P    |
| COPB Coatomer subunit beta                                    | Q9JIF7 | NO  | NO  | NO  | YES | YES | YES | P/MQ |
| DAZP1 DAZ-associated protein 1                                | Q9JII5 | NO  | NO  | NO  | YES | YES | NO  | P    |
| AK1A1 Aldo-keto reductase family 1 member A1                  | Q9JII6 | YES | NO  | YES | YES | YES | YES | P/MQ |
| DDX21 Nucleolar RNA helicase 2                                | Q9JIK5 | NO  | NO  | YES | YES | YES | YES | P/MQ |
| NHRF3 Na(+)/H(+) exchange regulatory cofactor NHE-RF3         | Q9JIL4 | YES | NO  | NO  | NO  | YES | NO  | P/MQ |
| SMAD9 Mothers against decapentaplegic homolog 9               | Q9JIW5 | NO  | YES | NO  | NO  | NO  | NO  | P    |
| RALB Ras-related protein Ral-B                                | Q9JIW9 | NO  | NO  | NO  | YES | YES | NO  | P    |
| ACINU Apoptotic chromatin condensation inducer in the nucleus | Q9JIX8 | YES | NO  | YES | YES | YES | YES | P/MQ |
| FLII Protein flightless-1 homolog                             | Q9JJ28 | NO  | NO  | NO  | YES | YES | YES | P/MQ |
| RL38 60S ribosomal protein L38                                | Q9JJI8 | NO  | NO  | NO  | YES | YES | NO  | P    |
| SH3L1 SH3 domain-binding glutamic acid-rich-like protein      | Q9JJU8 | NO  | NO  | NO  | YES | NO  | YES | P/MQ |
| SHLB1 Endophilin-B1                                           | Q9JK48 | NO  | NO  | NO  | YES | NO  | NO  | P    |
| PRELP Prolargin                                               | Q9JK53 | NO  | NO  | NO  | YES | NO  | NO  | P    |
| MYG1 UPF0160 protein MYG1, mitochondrial                      | Q9JK81 | NO  | YES | NO  | NO  | NO  | NO  | P    |
| UCHL3 Ubiquitin carboxyl-terminal hydrolase isozyme L3        | Q9JKB1 | NO  | NO  | YES | YES | YES | YES | P    |
| YBOX3 Y-box-binding protein 3                                 | Q9JKB3 | NO  | NO  | NO  | YES | YES | NO  | P/MQ |
| IQGA1 Ras GTPase-activating-like protein IQGAP1               | Q9JKF1 | YES | NO  | YES | YES | YES | YES | P/MQ |
| MBNL1 Muscleblind-like protein 1                              | Q9JKP5 | NO  | YES | NO  | NO  | NO  | NO  | P    |
| HYOU1 Hypoxia up-regulated protein 1                          | Q9JKR6 | NO  | NO  | YES | YES | YES | YES | P/MQ |
| ADRM1 Proteasomal ubiquitin receptor ADRM1                    | Q9JKV1 | NO  | NO  | NO  | YES | YES | YES | P/MQ |
| NUDT5 ADP-sugar pyrophosphatase                               | Q9JKX6 | NO  | NO  | NO  | YES | NO  | NO  | P/MQ |
| HIP1R Huntingtin-interacting protein 1-related protein        | Q9JKY5 | NO  | NO  | NO  | NO  | YES | NO  | P    |



|                                                                         |        |     |     |     |     |     |     |      |
|-------------------------------------------------------------------------|--------|-----|-----|-----|-----|-----|-----|------|
| FMNL1 Formin-like protein 1                                             | Q9JL26 | NO  | NO  | NO  | YES | YES | YES | P    |
| HMG5 High mobility group nucleosome-binding domain-containing protein 5 | Q9JL35 | NO  | NO  | NO  | YES | YES | NO  | P    |
| GLTP Glycolipid transfer protein                                        | Q9JL62 | NO  | NO  | NO  | YES | NO  | NO  | P    |
| MPP6 MAGUK p55 subfamily member 6                                       | Q9JLB0 | YES | YES | NO  | NO  | NO  | NO  | P    |
| CUBN Cubilin                                                            | Q9JLB4 | YES | NO  | YES | NO  | YES | NO  | P    |
| SCLY Selenocysteine lyase                                               | Q9JLI6 | NO  | NO  | NO  | YES | NO  | NO  | P    |
| Squamous cell carcinoma antigen recognized by T-cells 3                 | Q9JLI8 | YES | YES | YES | YES | YES | YES | MQ   |
| AL9A1 4-trimethylaminobutyraldehyde dehydrogenase                       | Q9JLI2 | YES | NO  | YES | YES | YES | YES | P/MQ |
| DCLK1 Serine/threonine-protein kinase DCLK1                             | Q9JLM8 | NO  | NO  | NO  | YES | NO  | NO  | P    |
| CD2AP CD2-associated protein                                            | Q9JLQ0 | YES | NO  | YES | YES | YES | YES | P/MQ |
| GIT2 ARF GTPase-activating protein GIT2                                 | Q9JLQ2 | NO  | NO  | NO  | YES | NO  | NO  | P    |
| TRXR2 Thioredoxin reductase 2, mitochondrial                            | Q9JLT4 | NO  | YES | NO  | NO  | NO  | NO  | P    |
| BAG3 BAG family molecular chaperone regulator 3                         | Q9JLV1 | NO  | NO  | YES | YES | YES | YES | P    |
| PNKP Bifunctional polynucleotide phosphatase/kinase                     | Q9JLV6 | NO  | NO  | YES | YES | YES | YES | P    |
| AUHM Methylglutaconyl-CoA hydratase, mitochondrial                      | Q9JLZ3 | YES | YES | NO  | NO  | NO  | NO  | P    |
| NT5C 5'(3')-deoxyribonucleotidase, cytosolic type                       | Q9JM14 | NO  | NO  | NO  | YES | NO  | NO  | P    |
| ARPC3 Actin-related protein 2/3 complex subunit 3                       | Q9JM76 | NO  | NO  | YES | YES | YES | YES | P    |
| BORG4 Cdc42 effector protein 4                                          | Q9JM96 | NO  | NO  | NO  | YES | NO  | NO  | P    |
| UBP14 Ubiquitin carboxyl-terminal hydrolase 14                          | Q9JMA1 | NO  | NO  | NO  | YES | NO  | NO  | P/MQ |
| STA10 START domain-containing protein 10                                | Q9JMD3 | NO  | YES | NO  | NO  | NO  | NO  | P    |
| EDF1 Endothelial differentiation-related factor 1                       | Q9JMG1 | NO  | NO  | NO  | YES | NO  | NO  | P    |
| TRXR1 Thioredoxin reductase 1, cytoplasmic                              | Q9JMH6 | YES | NO  | YES | YES | YES | YES | P/MQ |
| MY18A Unconventional myosin-XVIIIa                                      | Q9JMH9 | YES | NO  | YES | YES | YES | YES | P/MQ |
| HAOX2 Hydroxyacid oxidase 2                                             | Q9NYQ2 | YES | NO  | YES | NO  | YES | NO  | P    |
| GLRX1 Glutaredoxin-1                                                    | Q9QUH0 | NO  | NO  | YES | YES | YES | YES | P    |

|                                                               |        |     |     |     |     |     |     |      |
|---------------------------------------------------------------|--------|-----|-----|-----|-----|-----|-----|------|
| RHOA Transforming protein RhoA                                | Q9QUI0 | YES | NO  | YES | YES | YES | YES | P/MQ |
| PSA6 Proteasome subunit alpha type-6                          | Q9QUM9 | NO  | NO  | NO  | YES | NO  | YES | P    |
| PPCE Prolyl endopeptidase                                     | Q9QUR6 | NO  | NO  | NO  | YES | YES | YES | P    |
| PIN1 Peptidyl-prolyl cis-trans isomerase NIMA-interacting 1   | Q9QUR7 | NO  | NO  | NO  | YES | NO  | YES | P    |
| NAGAB Alpha-N-acetylgalactosaminidase                         | Q9QWR8 | NO  | YES | NO  | NO  | NO  | NO  | P    |
| CYH1 Cytohesin-1                                              | Q9QX11 | NO  | YES | NO  | NO  | NO  | NO  | P    |
| SON Protein SON                                               | Q9QX47 | NO  | NO  | YES | YES | YES | NO  | P/MQ |
| FBP1 Fructose-1,6-bisphosphatase 1                            | Q9QXD6 | YES | NO  | NO  | NO  | YES | NO  | P/MQ |
| ACSS2 Acetyl-coenzyme A synthetase, cytoplasmic               | Q9QXG4 | NO  | YES | NO  | NO  | NO  | NO  | P    |
| SHRM3 Protein Shroom3                                         | Q9QXN0 | NO  | YES | NO  | NO  | NO  | NO  | P    |
| MIOX Inositol oxygenase                                       | Q9QXN5 | NO  | YES | NO  | NO  | NO  | NO  | P    |
| PLEC Plectin                                                  | Q9QXS1 | YES | NO  | YES | YES | YES | YES | P/MQ |
| DREB Drebrin                                                  | Q9QXS6 | NO  | NO  | NO  | YES | YES | YES | P/MQ |
| CNPY2 Protein canopy homolog 2                                | Q9QXT0 | YES | NO  | YES | YES | YES | YES | P/MQ |
| LAT2 Large neutral amino acids transporter small subunit 2    | Q9QXW9 | NO  | YES | NO  | NO  | NO  | NO  | P    |
| CMC2 Calcium-binding mitochondrial carrier protein Aralar2    | Q9QXX4 | YES | YES | NO  | NO  | NO  | NO  | P    |
| EHD3 EH domain-containing protein 3                           | Q9QXY6 | NO  | NO  | NO  | NO  | YES | NO  | P    |
| MACF1 Microtubule-actin cross-linking factor 1                | Q9QXZ0 | YES | NO  | NO  | YES | YES | YES | P/MQ |
| MYO9B Unconventional myosin-IXb                               | Q9QY06 | NO  | NO  | NO  | YES | YES | YES | P    |
| ZBP1 Z-DNA-binding protein 1                                  | Q9QY24 | NO  | NO  | NO  | NO  | YES | NO  | P/MQ |
| VAPB Vesicle-associated membrane protein-associated protein B | Q9QY76 | YES | NO  | YES | YES | YES | YES | P/MQ |
| CLIC4 Chloride intracellular channel protein 4                | Q9QYB1 | YES | NO  | NO  | YES | YES | YES | P/MQ |
| ADDG Gamma-adducin                                            | Q9QYB5 | YES | NO  | NO  | NO  | YES | NO  | P    |
| ADDA Alpha-adducin                                            | Q9QYC0 | YES | NO  | YES | YES | YES | YES | P/MQ |
| Golgin subfamily A member 5                                   | Q9QYE6 | YES | YES | YES | YES | NO  | YES | MQ   |

|                                                              |        |     |     |     |     |     |     |      |
|--------------------------------------------------------------|--------|-----|-----|-----|-----|-----|-----|------|
| NDRG2 Protein NDRG2                                          | Q9QYG0 | NO  | YES | NO  | NO  | NO  | NO  | P    |
| DNJA2 DnaJ homolog subfamily A member 2                      | Q9QYJ0 | NO  | YES | NO  | NO  | NO  | NO  | P    |
| ACOT2 Acyl-coenzyme A thioesterase 2, mitochondrial          | Q9QYR9 | NO  | NO  | NO  | YES | YES | YES | P    |
| QKI Protein quaking                                          | Q9QYS9 | NO  | NO  | NO  | YES | NO  | NO  | P/MQ |
| PPM1D Protein phosphatase 1D                                 | Q9QZ67 | NO  | YES | NO  | NO  | NO  | NO  | P    |
| IIGP1 Interferon-inducible GTPase 1                          | Q9QZ85 | NO  | NO  | YES | YES | YES | YES | P    |
| VPS29 Vacuolar protein sorting-associated protein 29         | Q9QZ88 | NO  | YES | NO  | NO  | NO  | NO  | P    |
| EIF3I Eukaryotic translation initiation factor 3 subunit I   | Q9QZD9 | NO  | NO  | NO  | YES | YES | YES | P/MQ |
| COPG1 Coatamer subunit gamma-1                               | Q9QZE5 | YES | NO  | YES | YES | YES | YES | P/MQ |
| BCAR3 Breast cancer anti-estrogen resistance protein 3       | Q9QZK2 | NO  | YES | NO  | NO  | NO  | NO  | P    |
| DOK3 Docking protein 3                                       | Q9QZK7 | NO  | NO  | NO  | YES | YES | NO  | P    |
| RIPK3 Receptor-interacting serine/threonine-protein kinase 3 | Q9QZL0 | NO  | NO  | NO  | YES | YES | NO  | P    |
| UBQL2 Ubiquilin-2                                            | Q9QZM0 | NO  | NO  | NO  | YES | NO  | NO  | P    |
| AFAD Afadin                                                  | Q9QZQ1 | NO  | NO  | NO  | YES | YES | NO  | P    |
| H2AY Core histone macro-H2A.1                                | Q9QZQ8 | YES | NO  | YES | YES | YES | YES | P/MQ |
| GLYG Glycogenin-1                                            | Q9R062 | NO  | NO  | NO  | YES | YES | NO  | P    |
| BCAM Basal cell adhesion molecule                            | Q9R069 | YES | YES | NO  | NO  | NO  | NO  | P    |
| GALK1 Galactokinase                                          | Q9R0N0 | NO  | NO  | NO  | YES | NO  | NO  | P    |
| SYT7 Synaptotagmin-7                                         | Q9R0N7 | NO  | YES | NO  | NO  | NO  | NO  | P    |
| ESTD S-formylglutathione hydrolase                           | Q9R0P3 | YES | NO  | YES | YES | YES | YES | P/MQ |
| SMAP Small acidic protein                                    | Q9R0P4 | NO  | NO  | NO  | YES | YES | YES | P/MQ |
| DEST Destrin                                                 | Q9R0P5 | YES | NO  | YES | YES | YES | YES | P/MQ |
| ARC1A Actin-related protein 2/3 complex subunit 1A           | Q9R0Q6 | NO  | YES | NO  | NO  | NO  | NO  | P    |
| TEBP Prostaglandin E synthase 3                              | Q9R0Q7 | NO  | YES | NO  | NO  | NO  | NO  | P    |
| SRS10 Serine/arginine-rich splicing factor 10                | Q9R0U0 | NO  | NO  | NO  | YES | NO  | NO  | P    |
| ACOT9 Acyl-coenzyme A thioesterase 9, mitochondrial          | Q9R0X4 | NO  | YES | NO  | NO  | NO  | NO  | P    |

|                                                    |        |     |     |     |     |     |     |      |
|----------------------------------------------------|--------|-----|-----|-----|-----|-----|-----|------|
| KAD1 Adenylate kinase isoenzyme 1                  | Q9R0Y5 | YES | YES | NO  | NO  | NO  | NO  | P    |
| GUAD Guanine deaminase                             | Q9R111 | NO  | NO  | YES | YES | YES | YES | P/MQ |
| SQOR Sulfide:quinone oxidoreductase, mitochondrial | Q9R112 | YES | NO  | YES | YES | YES | YES | P/MQ |
| MTA2 Metastasis-associated protein MTA2            | Q9R190 | NO  | NO  | NO  | YES | NO  | NO  | P    |
| PSA4 Proteasome subunit alpha type-4               | Q9R1P0 | NO  | NO  | NO  | NO  | YES | YES | P    |
| PSB2 Proteasome subunit beta type-2                | Q9R1P3 | NO  | NO  | NO  | YES | NO  | NO  | P    |
| PSA1 Proteasome subunit alpha type-1               | Q9R1P4 | YES | NO  | YES | YES | YES | YES | P/MQ |
| SAE1 SUMO-activating enzyme subunit 1              | Q9R1T2 | NO  | NO  | YES | YES | YES | YES | P/MQ |
| SEPT6 Septin-6                                     | Q9R1T4 | NO  | NO  | NO  | YES | NO  | NO  | P    |
| VINEX Vinexin                                      | Q9R1Z8 | NO  | YES | NO  | NO  | NO  | NO  | P/MQ |
| TPSN Tapasin                                       | Q9R233 | NO  | NO  | YES | YES | YES | YES | P    |
| PEPL Periplakin                                    | Q9R269 | NO  | YES | NO  | NO  | NO  | NO  | P    |
| MYO1C Unconventional myosin-Ic                     | Q9WTI7 | YES | NO  | YES | YES | YES | YES | P/MQ |
| NFKB2 Nuclear factor NF-kappa-B p100 subunit       | Q9WTK5 | NO  | NO  | NO  | YES | NO  | YES | P    |
| RUVB2 RuvB-like 2                                  | Q9WTM5 | NO  | NO  | YES | YES | YES | YES | P/MQ |
| KAD2 Adenylate kinase 2, mitochondrial             | Q9WTP6 | YES | NO  | YES | YES | YES | YES | P/MQ |
| KAD3 GTP:AMP phosphotransferase AK3, mitochondrial | Q9WTP7 | YES | NO  | YES | YES | YES | NO  | P/MQ |
| AKA12 A-kinase anchor protein 12                   | Q9WTQ5 | YES | NO  | YES | YES | YES | YES | P/MQ |
| CAD13 Cadherin-13                                  | Q9WTR5 | NO  | YES | NO  | NO  | NO  | NO  | P    |
| SKP1 S-phase kinase-associated protein 1           | Q9WTX5 | NO  | NO  | YES | YES | YES | NO  | P/MQ |
| PDC6I Programmed cell death 6-interacting protein  | Q9WU78 | YES | NO  | YES | YES | YES | YES | P/MQ |
| PROD Proline dehydrogenase 1, mitochondrial        | Q9WU79 | YES | YES | NO  | NO  | NO  | NO  | P    |
| CCS Copper chaperone for superoxide dismutase      | Q9WU84 | NO  | YES | NO  | NO  | NO  | NO  | P    |
| SYFB Phenylalanine--tRNA ligase beta subunit       | Q9WUA2 | YES | NO  | YES | YES | YES | YES | P    |
| PYGM Glycogen phosphorylase, muscle form           | Q9WUB3 | NO  | YES | NO  | NO  | NO  | NO  | P    |
| CLCKB Chloride channel protein CIC-Kb              | Q9WUB6 | NO  | YES | NO  | NO  | NO  | NO  | P    |
| IF4H Eukaryotic translation initiation factor 4H   | Q9WUK2 | NO  | NO  | YES | YES | YES | YES | P/MQ |

|                                                                         |        |     |     |     |     |     |     |      |
|-------------------------------------------------------------------------|--------|-----|-----|-----|-----|-----|-----|------|
| ARL3 ADP-ribosylation factor-like protein 3                             | Q9WUL7 | NO  | YES | NO  | NO  | NO  | NO  | P    |
| COR1B Coronin-1B                                                        | Q9WUM3 | NO  | NO  | NO  | YES | YES | YES | P    |
| COR1C Coronin-1C                                                        | Q9WUM4 | NO  | NO  | NO  | YES | NO  | NO  | P    |
| UCHL5 Ubiquitin carboxyl-terminal hydrolase isozyme L5                  | Q9WUP7 | NO  | YES | NO  | NO  | NO  | NO  | P    |
| PREB Prolactin regulatory element-binding protein                       | Q9WUQ2 | NO  | NO  | NO  | NO  | YES | NO  | P    |
| ECI2 Enoyl-CoA delta isomerase 2, mitochondrial                         | Q9WUR2 | YES | NO  | YES | YES | YES | NO  | P    |
| KAD4 Adenylate kinase 4, mitochondrial                                  | Q9WUR9 | YES | NO  | NO  | NO  | NO  | NO  | P    |
| CATZ Cathepsin Z                                                        | Q9WUU7 | NO  | NO  | NO  | YES | YES | YES | P/MQ |
| RBMX RNA-binding motif protein, X chromosome                            | Q9WV02 | NO  | NO  | YES | YES | YES | YES | P/MQ |
| ARC1B Actin-related protein 2/3 complex subunit 1B                      | Q9WV32 | YES | NO  | YES | YES | YES | YES | P/MQ |
| VAPA Vesicle-associated membrane protein-associated protein A           | Q9WV55 | NO  | NO  | NO  | YES | YES | YES | P    |
| DEMA Dematin                                                            | Q9WV69 | NO  | YES | NO  | NO  | NO  | NO  | P    |
| SNX1 Sorting nexin-1                                                    | Q9WV80 | YES | NO  | YES | YES | YES | YES | P/MQ |
| E41L3 Band 4.1-like protein 3                                           | Q9WV92 | YES | NO  | YES | NO  | YES | NO  | P/MQ |
| TIM8A Mitochondrial import inner membrane translocase subunit Tim8 A    | Q9WVA2 | NO  | YES | NO  | NO  | NO  | NO  | P    |
| BUB3 Mitotic checkpoint protein BUB3                                    | Q9WVA3 | NO  | NO  | NO  | YES | YES | YES | P    |
| TAGL2 Transgelin-2                                                      | Q9WVA4 | YES | NO  | YES | YES | YES | YES | P/MQ |
| RBPMS RNA-binding protein with multiple splicing                        | Q9WVB0 | YES | NO  | YES | YES | YES | YES | P    |
| PACN2 Protein kinase C and casein kinase substrate in neurons protein 2 | Q9WVE8 | YES | NO  | YES | YES | YES | YES | P/MQ |
| EHD1 EH domain-containing protein 1                                     | Q9WVK4 | NO  | NO  | YES | YES | YES | YES | P/MQ |
| MAAI Maleylacetoacetate isomerase                                       | Q9WVL0 | YES | YES | NO  | NO  | NO  | NO  | P    |
| S12A7 Solute carrier family 12 member 7                                 | Q9WVL3 | NO  | YES | NO  | NO  | NO  | NO  | P    |
| AADAT Kynurenine/alpha-aminoadipate aminotransferase, mitochondrial     | Q9WVM8 | NO  | NO  | NO  | YES | YES | NO  | P    |
| GBP2 Guanylate-binding protein 2                                        | Q9Z0E6 | NO  | NO  | YES | YES | YES | YES | P/MQ |
| SYUG Gamma-synuclein                                                    | Q9Z0F7 | YES | NO  | NO  | NO  | YES | NO  | P/MQ |

|                                                                       |        |     |     |     |     |     |     |      |
|-----------------------------------------------------------------------|--------|-----|-----|-----|-----|-----|-----|------|
| CELF2 CUGBP Elav-like family member 2                                 | Q9Z0H4 | NO  | NO  | NO  | YES | NO  | NO  | P    |
| CLIP2 CAP-Gly domain-containing linker protein 2                      | Q9Z0H8 | NO  | NO  | NO  | YES | NO  | NO  | P    |
| VNN1 Pantetheinase                                                    | Q9Z0K8 | YES | YES | NO  | NO  | NO  | NO  | P    |
| IF2G Eukaryotic translation initiation factor 2 subunit 3, X-linked   | Q9Z0N1 | NO  | NO  | YES | YES | YES | YES | P/MQ |
| PALM Paralemmin-1                                                     | Q9Z0P4 | YES | NO  | NO  | YES | YES | YES | P/MQ |
| TWF2 Twinfilin-2                                                      | Q9Z0P5 | NO  | NO  | NO  | YES | YES | YES | P    |
| ITSN1 Intersectin-1                                                   | Q9Z0R4 | NO  | NO  | NO  | YES | NO  | NO  | P    |
| ITSN2 Intersectin-2                                                   | Q9Z0R6 | NO  | NO  | NO  | YES | NO  | NO  | P    |
| BPNT1 3'(2'),5'-bisphosphate nucleotidase 1                           | Q9Z0S1 | NO  | YES | NO  | NO  | NO  | NO  | P    |
| ZO2 Tight junction protein ZO-2                                       | Q9Z0U1 | YES | NO  | YES | YES | YES | YES | P/MQ |
| TI17B Mitochondrial import inner membrane translocase subunit Tim17-B | Q9Z0V7 | NO  | YES | NO  | NO  | NO  | NO  | P    |
| AIFM1 Apoptosis-inducing factor 1, mitochondrial                      | Q9Z0X1 | YES | NO  | YES | YES | YES | NO  | P/MQ |
| STAU1 Double-stranded RNA-binding protein Staufen homolog 1           | Q9Z108 | NO  | NO  | NO  | NO  | YES | NO  | P    |
| HNRDL Heterogeneous nuclear ribonucleoprotein D-like                  | Q9Z130 | NO  | NO  | NO  | YES | NO  | NO  | P    |
| SUMO3 Small ubiquitin-related modifier 3                              | Q9Z172 | NO  | YES | NO  | NO  | NO  | NO  | P    |
| PADI4 Protein-arginine deiminase type-4                               | Q9Z183 | NO  | NO  | NO  | YES | YES | YES | P    |
| EIF3G Eukaryotic translation initiation factor 3 subunit G            | Q9Z1D1 | YES | NO  | YES | YES | YES | YES | P/MQ |
| GYS1 Glycogen [starch] synthase, muscle                               | Q9Z1E4 | NO  | NO  | NO  | YES | NO  | NO  | P    |
| SAE2 SUMO-activating enzyme subunit 2                                 | Q9Z1F9 | NO  | NO  | NO  | YES | NO  | NO  | P/MQ |
| VATC1 V-type proton ATPase subunit C 1                                | Q9Z1G3 | NO  | NO  | NO  | YES | NO  | NO  | P/MQ |
| NFS1 Cysteine desulfurase, mitochondrial                              | Q9Z1J3 | NO  | YES | NO  | NO  | NO  | NO  | P    |
| DX39B Spliceosome RNA helicase Ddx39b                                 | Q9Z1N5 | NO  | NO  | YES | NO  | YES | YES | P    |
| NDUA7 NADH dehydrogenase [ubiquinone] 1 alpha subcomplex subunit 7    | Q9Z1P6 | YES | YES | NO  | NO  | NO  | NO  | P    |
| CLIC1 Chloride intracellular channel protein 1                        | Q9Z1Q5 | YES | NO  | YES | YES | YES | YES | P/MQ |

|                                                           |        |     |     |     |     |     |     |      |
|-----------------------------------------------------------|--------|-----|-----|-----|-----|-----|-----|------|
| SYVC Valine--tRNA ligase                                  | Q9Z1Q9 | NO  | NO  | YES | YES | YES | YES | P/MQ |
| BAG6 Large proline-rich protein BAG6                      | Q9Z1R2 | NO  | NO  | NO  | YES | NO  | NO  | P    |
| ILF3 Interleukin enhancer-binding factor 3                | Q9Z1X4 | NO  | NO  | NO  | YES | NO  | YES | P    |
| TRIP6 Thyroid receptor-interacting protein 6              | Q9Z1Y4 | NO  | YES | NO  | NO  | NO  | NO  | P    |
| USO1 General vesicular transport factor p115              | Q9Z1Z0 | NO  | NO  | NO  | YES | YES | YES | P/MQ |
| STRAP Serine-threonine kinase receptor-associated protein | Q9Z1Z2 | YES | NO  | NO  | NO  | YES | NO  | P    |
| HNRPC Heterogeneous nuclear ribonucleoproteins C1/C2      | Q9Z204 | YES | NO  | YES | YES | YES | YES | P/MQ |
| MECP2 Methyl-CpG-binding protein 2                        | Q9Z2D6 | YES | NO  | YES | YES | YES | YES | P/MQ |
| MBD2 Methyl-CpG-binding domain protein 2                  | Q9Z2E1 | NO  | NO  | NO  | YES | NO  | NO  | P    |
| E41L1 Band 4.1-like protein 1                             | Q9Z2H5 | NO  | YES | NO  | NO  | NO  | NO  | P    |
| GIPC2 PDZ domain-containing protein GIPC2                 | Q9Z2H7 | YES | YES | NO  | NO  | NO  | NO  | P    |
| LETM1 Mitochondrial proton/calcium exchanger protein      | Q9Z2I0 | YES | NO  | NO  | YES | NO  | NO  | P    |
| S23A1 Solute carrier family 23 member 1                   | Q9Z2J0 | NO  | YES | NO  | NO  | NO  | NO  | P    |
| PMM2 Phosphomannomutase 2                                 | Q9Z2M7 | NO  | NO  | YES | YES | NO  | YES | P    |
| ACL6A Actin-like protein 6A                               | Q9Z2N8 | NO  | NO  | NO  | YES | NO  | NO  | P    |
| KOP1 Lysine-rich nucleolar protein 1                      | Q9Z2Q2 | NO  | YES | NO  | NO  | NO  | NO  | P    |
| SEPT5 Septin-5                                            | Q9Z2Q6 | NO  | NO  | NO  | YES | NO  | NO  | P    |
| U119A Protein unc-119 homolog A                           | Q9Z2R6 | NO  | NO  | NO  | YES | NO  | NO  | P    |
| PSA7 Proteasome subunit alpha type-7                      | Q9Z2U0 | YES | NO  | YES | YES | YES | YES | P/MQ |
| PSA5 Proteasome subunit alpha type-5                      | Q9Z2U1 | NO  | NO  | NO  | YES | NO  | YES | P/MQ |
| PCK1 Phosphoenolpyruvate carboxykinase, cytosolic [GTP]   | Q9Z2V4 | YES | NO  | NO  | NO  | YES | NO  | P    |
| DNPEP Aspartyl aminopeptidase                             | Q9Z2W0 | NO  | YES | NO  | NO  | NO  | NO  | P    |
| HNRPF Heterogeneous nuclear ribonucleoprotein F           | Q9Z2X1 | NO  | NO  | YES | YES | YES | YES | P/MQ |
| PLPHP Pyridoxal phosphate homeostasis protein             | Q9Z2Y8 | NO  | NO  | YES | NO  | YES | YES | P    |
| SNUT1 U4/U6.U5 tri-snRNP-associated protein 1             | Q9Z315 | YES | NO  | YES | YES | YES | YES | P/MQ |

|                                                    |        |     |     |     |     |     |     |    |
|----------------------------------------------------|--------|-----|-----|-----|-----|-----|-----|----|
| ITPR2 Inositol 1,4,5-trisphosphate receptor type 2 | Q9Z329 | NO  | YES | NO  | NO  | NO  | NO  | P  |
| 2-oxoglutarate dehydrogenase, mitochondrial        | Z4YJV4 | YES | YES | YES | YES | YES | YES | MQ |
