# Supplementary material
Source: PubMed Central journal article supplement (PMC7796985)
Supplement: NIHMS1654501-supplement-table_S2.pdf [file NIHMS1654501-supplement-table_S2.pdf]

| Protein Name                                        | Protein Id | Gene product | Function                      | 4 dpi SAC | 10 dpi SAC | 4 dpi Interface | 10 dpi Interface | Platform |
|-----------------------------------------------------|------------|--------------|-------------------------------|-----------|------------|-----------------|------------------|----------|
| 50S ribosomal protein L30                           | Q2FEQ7     | RpmD         | Ribosome                      | YES       | YES        | NO              | YES              | P/MQ     |
| 50S ribosomal protein L17                           | Q2FER6     | RplQ         | Ribosome                      | YES       | YES        | NO              | YES              | P/MQ     |
| Threonine--tRNA ligase                              | Q2FG54     | ThrS         | Translation                   | NO        | YES        | YES             | YES              | P/MQ     |
| Elongation factor Ts                                | Q2FHI1     | Tsf          | Translation                   | YES       | YES        | NO              | YES              | P/MQ     |
| Elongation factor Tu                                | Q2FJ92     | Tuf          | Translation                   | YES       | YES        | YES             | YES              | P/MQ     |
| Elongation factor G                                 | Q2FJ93     | FusA         | Translation                   | NO        | YES        | YES             | YES              | P        |
| 50S ribosomal protein L7/L12                        | Q2FJA0     | RplL         | Ribosome                      | YES       | YES        | NO              | YES              | P        |
| Uncharacterized leukocidin-like protein 2           | Q2FFA2     | LukA         | Virulence                     | NO        | YES        | NO              | YES              | P/MQ     |
| Extracellular matrix-binding protein ebh            | Q2FH04     | Ebh          | Virulence                     | YES       | YES        | YES             | YES              | P        |
| Extracellular adherence protein                     | A6QIG2     | Eap          | Virulence                     | YES       | YES        | YES             | YES              | P        |
| FPRL1 inhibitory protein                            | Q2FHS7     | FLIPr        | Virulence/<br>Immune Evasion  | NO        | YES        | NO              | YES              | P/MQ     |
| Extracellular matrix protein-binding protein emp    | Q2FIK4     | Emp          | Virulence                     | YES       | YES        | YES             | YES              | P/MQ     |
| Iron-regulated surface determinant protein A        | Q2FHV1     | IsdA         | Metal homeostasis             | NO        | YES        | NO              | YES              | P/MQ     |
| Iron-regulated surface determinant protein B        | Q2FHV2     | IsdB         | Metal homeostasis             | NO        | NO         | NO              | YES              | P        |
| L-lactate dehydrogenase 2                           | Q2FDQ7     | Ldh2         | Anaerobic metabolism          | YES       | YES        | YES             | YES              | P/MQ     |
| Enolase                                             | Q2FIL7     | Eno          | Energy                        | YES       | YES        | NO              | YES              | P/MQ     |
| Alcohol dehydrogenase                               | Q2FJ31     | Adh          | Anaerobic metabolism          | YES       | YES        | YES             | YES              | P/MQ     |
| Formate acetyltransferase                           | Q2FK44     | PflB         | Anaerobic metabolism          | YES       | YES        | YES             | YES              | P/MQ     |
| ATP-dependent Clp protease ATP-binding subunit ClpL | Q2FDV8     | ClpL         | Stress                        | NO        | YES        | NO              | YES              | P        |
| Putative universal stress protein SAUSA300_1656     | Q2FG28     | USP2         | Stress                        | YES       | YES        | YES             | YES              | P/MQ     |
| Alanine dehydrogenase 1                             | Q2FH00     | Ald1         | L-alanine catabolic processes | NO        | YES        | NO              | YES              | P/MQ     |
| Alkyl hydroperoxide reductase C                     | Q2FJN4     | AhpC         | Stress                        | YES       | YES        | YES             | YES              | P/MQ     |
| Trigger factor                                      | Q2FG61     | Tig          | Protein folding               | NO        | YES        | NO              | YES              | P/MQ     |

|                                                        |        |               |                         |     |     |     |     |      |
|--------------------------------------------------------|--------|---------------|-------------------------|-----|-----|-----|-----|------|
| Chaperone protein DnaK                                 | Q2FGE3 | DnaK          | Protein folding         | YES | YES | YES | YES | P/MQ |
| UPF0337 protein SAUSA300_0816                          | Q2FIG2 | SAUSA300_0816 | Unknown function        | NO  | NO  | NO  | YES | P/MQ |
| GTP-sensing transcriptional pleiotropic repressor CodY | Q2FHI3 | CodY          | Regulation/ Nutrition   | YES | YES | NO  | YES | P/MQ |
| Fructose-bisphosphate aldolase class 1                 | Q2FDQ4 | Fda           | Glycolysis              | YES | YES | YES | YES | P/MQ |
| ATP synthase subunit alpha                             | Q2FF22 | AtpA          | Energy                  | YES | YES | YES | YES | P    |
| ATP synthase subunit beta                              | Q2FF24 | AtpD          | Energy                  | YES | YES | YES | YES | P    |
| S-adenosylmethionine synthase                          | Q2FFV6 | MetK          | Amino acid biosynthesis | YES | YES | YES | YES | P    |
| Pyruvate kinase                                        | Q2FG40 | Pyk           | Glycolysis              | NO  | YES | NO  | YES | P    |
| Glucose-6-phosphate isomerase                          | Q2FIB3 | Pgi           | Glycolysis              | NO  | YES | NO  | YES | P/MQ |

Table S2: List of bacterial proteins detected and their localizations based on stringent search criteria from Protalizer and MaxQuant. No bacterial proteins were detected in the cortex.
